# Supplementary material
Source: publisher site journal article supplement (http://www.spandidos-publications.com/62/downloadSupplementary)
Supplement: Supplementary file 1 [file downloadSupplementary]

## Sheet: topblast
Table SIV. GO annotation analysis of differentailly expressed protins in the 3 h/0 h group.
Sequence name	Sequence desc.	Sequence length	Hit desc.	Hit ACC	E-Value	Similarity	Bit-Score	Alignment length	Positives
P60524	HBB_CHRBRHemoglobin subunit beta OS=Chrysocyon brachyurus GN=HBB PE=1 SV=1	146	sp|P60526|HBB_CHRBRHemoglobin subunit beta OS=Chrysocyon brachyurus GN=HBB PE=1 SV=1	P60526	1.62469e-102	100	298.13	146	146
P60529	HBA_CANLFHemoglobin subunit alpha OS=Canis lupus familiaris GN=HBA PE=1 SV=1	141	sp|P60529|HBA_CANLFHemoglobin subunit alpha OS=Canis lupus familiaris GN=HBA PE=1 SV=1	P60529	1.2284e-97	100	285.419	141	141
J9JHF7	HBA_CANLAHemoglobin subunit alpha OS=Canis latrans GN=HBA PE=1 SV=2	142	tr|J9JHF7|J9JHF7_CANLFUncharacterized protein OS=Canis lupus familiaris GN=LOC100855540 PE=3 SV=1	J9JHF7	7.00044e-99	100	288.5	142	142
F1PJ74	F1PJ74_CANLFApolipo E OS=Canis lupus familiaris GN=APOE PE=3 SV=1	323	tr|F1PJ74|F1PJ74_CANLFApolipoprotein E OS=Canis lupus familiaris GN=APOE PE=3 SV=1	F1PJ74	0	100	635.95	323	323
J9PBN6	L5KI66_PTEALAlpha-2-macroglobulin OS=Pteropus alecto GN=PAL_GLEAN10015609 PE=4 SV=1	1478	tr|J9PBN6|J9PBN6_CANLFUncharacterized protein OS=Canis lupus familiaris GN=LOC611458 PE=4 SV=1	J9PBN6	0	100	3067.33	1478	1478
J9P8M2	J9P8M2_CANLFFibronectin OS=Canis lupus familiaris GN=FN1 PE=4 SV=1	2256	tr|J9P8M2|J9P8M2_CANLFFibronectin OS=Canis lupus familiaris GN=FN1 PE=4 SV=1	J9P8M2	0	100	4659.36	2256	2256
F1P6H7	F1P6H7_CANLFFibronectin OS=Canis lupus familiaris GN=FN1 PE=4 SV=2	2426	tr|F1P6H7|F1P6H7_CANLFFibronectin OS=Canis lupus familiaris GN=FN1 PE=4 SV=2	F1P6H7	0	100	4999.49	2426	2426
E2QYB2	E2QYB2_CANLFUncharacterized protein OS=Canis lupus familiaris PE=4 SV=2	111	tr|E2QYB2|E2QYB2_CANLFUncharacterized protein OS=Canis lupus familiaris PE=4 SV=2	E2QYB2	4.98648e-76	100	228.024	111	111
P00011	G4XXS8_CANLUCytochrome c OS=Canis lupus GN=CYCS PE=3 SV=1	105	tr|G4XXS8|G4XXS8_CANLUCytochrome c OS=Canis lupus GN=CYCS PE=3 SV=1	G4XXS8	2.96835e-71	100	215.312	105	105
E2R7A3	U6DIQ6_NEOVIComplement factor I (Fragment) OS=Neovison vison GN=E7ETH0 PE=2 SV=1	565	tr|E2R7A3|E2R7A3_CANLFUncharacterized protein OS=Canis lupus familiaris GN=CFI PE=3 SV=2	E2R7A3	0	100	1170.61	565	565
F1PDY8	M1EKL8_MUSPFCarbonic anhydrase II (Fragment) OS=Mustela putorius furo PE=2 SV=1	260	tr|F1PDY8|F1PDY8_CANLFUncharacterized protein OS=Canis lupus familiaris GN=CA2 PE=4 SV=2	F1PDY8	0	100	543.502	260	260
F1PNY4	F1PNY4_CANLFKeratinocyte differentiation-associated OS=Canis lupus familiaris GN=KRTDAP PE=4 SV=2	98	tr|F1PNY4|F1PNY4_CANLFKeratinocyte differentiation-associated protein OS=Canis lupus familiaris GN=KRTDAP PE=4 SV=2	F1PNY4	6.69421e-64	100	196.438	98	98
E2R4H4	Q5U0A0_HUMANProteasome subunit alpha type OS=Homo sapiens PE=2 SV=1	183	tr|E2R4H4|E2R4H4_CANLFUncharacterized protein OS=Canis lupus familiaris GN=PSMA5 PE=4 SV=2	E2R4H4	4.01691e-133	100	378.637	183	183
J9NVE9	J9NVE9_CANLFSerum amyloid A OS=Canis lupus familiaris GN=LOC102155886 PE=3 SV=1	130	tr|J9NVE9|J9NVE9_CANLFSerum amyloid A protein OS=Canis lupus familiaris GN=LOC102155886 PE=3 SV=1	J9NVE9	2.39204e-92	100	271.166	130	130
J9P9B9	L9JM01_TUPCHIg kappa chain V-II region RPMI 6410 OS=Tupaia chinensis GN=TREES_T100021696 PE=4 SV=1	126	tr|J9P9B9|J9P9B9_CANLFUncharacterized protein OS=Canis lupus familiaris PE=4 SV=1	J9P9B9	6.8171e-88	100	259.225	126	126
J9NS29	J9NS29_CANLFCystatin OS=Canis lupus familiaris GN=LOC607874 PE=3 SV=1	153	tr|J9NS29|J9NS29_CANLFCystatin OS=Canis lupus familiaris GN=LOC607874 PE=3 SV=1	J9NS29	1.55169e-108	100	313.923	153	153
F1P8V6	F1P8V6_CANLFMyoglobin OS=Canis lupus familiaris GN=MB PE=3 SV=1	154	tr|F1P8V6|F1P8V6_CANLFMyoglobin OS=Canis lupus familiaris GN=MB PE=3 SV=1	F1P8V6	4.29115e-107	100	310.457	154	154
J9P4B4	S7MGY1_MYOBRComplement C1q subcomponent subunit A OS=Myotis brandtii GN=D623_10012686 PE=4 SV=1	264	tr|J9P4B4|J9P4B4_CANLFUncharacterized protein OS=Canis lupus familiaris GN=C1QA PE=4 SV=1	J9P4B4	0	100	528.48	264	264
F1PYZ1	gamma A (Fragment) OS=Mustela putorius furo PE=2 SV=1	149	tr|F1PYZ1|F1PYZ1_CANLFUncharacterized protein OS=Canis lupus familiaris GN=LOC485255 PE=3 SV=2	F1PYZ1	6.02438e-107	100	309.686	149	149
E2QUU8	L5KZ88_PTEALIg lambda chain V region 4A OS=Pteropus alecto GN=PAL_GLEAN10000188 PE=4 SV=1	145	tr|E2QUU8|E2QUU8_CANLFUncharacterized protein OS=Canis lupus familiaris PE=4 SV=2	E2QUU8	1.95054e-100	100	292.738	145	145
F1Q0N9	A0A0K2A1G0_CASFIKeratin 19 OS=Castor fiber PE=2 SV=1	399	tr|F1Q0N9|F1Q0N9_CANLFUncharacterized protein OS=Canis lupus familiaris GN=KRT19 PE=3 SV=1	F1Q0N9	0	100	805.438	399	399
F1P8A6	G7Q2X0_MACFA Z39Ig OS=Macaca fascicularis GN=EGM_18851 PE=4 SV=1	399	tr|F1P8A6|F1P8A6_CANLFUncharacterized protein OS=Canis lupus familiaris GN=VSIG4 PE=4 SV=2	F1P8A6	0	100	829.321	399	399
J9NYN2	CSRP1_RATCysteine and glycine-rich 1 OS=Rattus norvegicus GN=Csrp1 PE=1 SV=2	193	tr|J9NYN2|J9NYN2_CANLFUncharacterized protein OS=Canis lupus familiaris GN=CSRP1 PE=4 SV=1	J9NYN2	6.48177e-138	100	391.734	193	193
Q0QEN2	L5KVR4_PTEALATP synthase subunit beta OS=Pteropus alecto GN=PAL_GLEAN10004833 PE=3 SV=1	321	tr|L5KVR4|L5KVR4_PTEALATP synthase subunit beta OS=Pteropus alecto GN=PAL_GLEAN10004833 PE=3 SV=1	L5KVR4	0	100	656.751	321	321
J9NZW6	L8I3W2_9CETAApolipo F (Fragment) OS=Bos mutus GN=M91_19740 PE=4 SV=1	288	tr|J9NZW6|J9NZW6_CANLFUncharacterized protein OS=Canis lupus familiaris GN=APOF PE=4 SV=1	J9NZW6	0	100	592.038	288	288
E2RKW4	M1EPH8_MUSPFCysteine-rich secretory 3 (Fragment) OS=Mustela putorius furo PE=2 SV=1	183	tr|E2RKW4|E2RKW4_CANLFUncharacterized protein OS=Canis lupus familiaris GN=CRISP2 PE=3 SV=2	E2RKW4	1.80047e-136	100	387.111	183	183
E2QW34	M3YTX0_MUSPFProteasome subunit beta type OS=Mustela putorius furo GN=PSMB2 PE=3 SV=1	201	tr|M3YTX0|M3YTX0_MUSPFProteasome subunit beta type OS=Mustela putorius furo GN=PSMB2 PE=3 SV=1	M3YTX0	7.94565e-148	100	417.542	201	201
E2R5H4	G5BBQ5_HETGAIntegrin-linked kinase OS=Heterocephalus glaber GN=ILK PE=4 SV=1	452	tr|G5BBQ5|G5BBQ5_HETGAIntegrin-linked protein kinase OS=Heterocephalus glaber GN=ILK PE=4 SV=1	G5BBQ5	0	100	946.036	452	452
J9PB81	A0A061IJ91_CRIGRCathepsin G OS=Cricetulus griseus GN=H671_1g4192 PE=3 SV=1	247	tr|J9PB81|J9PB81_CANLFUncharacterized protein OS=Canis lupus familiaris GN=CTSG PE=3 SV=1	J9PB81	5.40263e-179	100	500.36	247	247
E2QXH0	U6CSB5_NEOVIPhospholipase A1 member A OS=Neovison vison GN=PLA1A PE=2 SV=1	456	tr|E2QXH0|E2QXH0_CANLFUncharacterized protein OS=Canis lupus familiaris GN=PLA1A PE=3 SV=2	E2QXH0	0	100	944.88	456	456
C4MW55	C4MW55_CANLFCytochrome c oxidase subunit 2 OS=Canis lupus familiaris GN=COX2 PE=3 SV=1	227	tr|C4MW55|C4MW55_CANLFCytochrome c oxidase subunit 2 OS=Canis lupus familiaris GN=COX2 PE=3 SV=1	C4MW55	8.02406e-165	100	462.611	227	227
F6Y5M8	L5KT98_PTEALUPF0566 OS=Pteropus alecto GN=PAL_GLEAN10021244 PE=4 SV=1	171	tr|F6Y5M8|F6Y5M8_CANLFUncharacterized protein OS=Canis lupus familiaris GN=LOC100856725 PE=4 SV=1	F6Y5M8	1.72459e-123	100	353.214	171	171
F1PIF2	A0A091DGR2_FUKDACathepsin Z OS=Fukomys damarensis GN=H920_07249 PE=3 SV=1	261	tr|F1PIF2|F1PIF2_CANLFUncharacterized protein OS=Canis lupus familiaris GN=CTSZ PE=3 SV=2	F1PIF2	0	100	546.969	261	261
L7N0L9	KCRB_CANLFCreatine kinase B-type OS=Canis lupus familiaris GN=CKB PE=1 SV=1	349	tr|L7N0L9|L7N0L9_CANLFUncharacterized protein OS=Canis lupus familiaris PE=3 SV=1	L7N0L9	0	100	718.768	349	349
F1PGC3	K9K225_HORSEInterferon-induced wit tetratricopeptide repeats 2 OS=Equus caballus PE=2 SV=1	468	tr|F1PGC3|F1PGC3_CANLFUncharacterized protein OS=Canis lupus familiaris GN=IFIT2 PE=4 SV=2	F1PGC3	0	100	973.385	468	468
E2RLF1	L5KDZ0_PTEALProactivator polypeptide OS=Pteropus alecto GN=PAL_GLEAN10020518 PE=4 SV=1	524	tr|E2RLF1|E2RLF1_CANLFUncharacterized protein OS=Canis lupus familiaris GN=PSAP PE=4 SV=1	E2RLF1	0	100	1069.3	524	524
E2R997	U6CU16_NEOVIPhenazine biosynthesis-like domain-containing OS=Neovison vison GN=PBLD PE=2 SV=1	255	tr|E2R997|E2R997_CANLFUncharacterized protein OS=Canis lupus familiaris GN=PBLD PE=4 SV=2	E2R997	0	100	528.094	255	255
E2R357	D5K8A6_PIGSperm associated antigen 4 OS=Sus scrofa GN=SPAG4L PE=2 SV=1	365	tr|E2R357|E2R357_CANLFUncharacterized protein OS=Canis lupus familiaris GN=SUN5 PE=4 SV=1	E2R357	0	100	767.303	365	365
F1PB77	F1PB77_CANLFAlpha-1,4 glucan phosphorylase OS=Canis lupus familiaris GN=PYGL PE=3 SV=2	870	tr|F1PB77|F1PB77_CANLFAlpha-1,4 glucan phosphorylase OS=Canis lupus familiaris GN=PYGL PE=3 SV=2	F1PB77	0	100	1813.12	870	870
E2RL75	L5JNT1_PTEALIntegrator complex subunit 4 OS=Pteropus alecto GN=PAL_GLEAN10025536 PE=4 SV=1	964	tr|E2RL75|E2RL75_CANLFUncharacterized protein OS=Canis lupus familiaris GN=INTS4 PE=4 SV=1	E2RL75	0	100	1985.69	964	964
J9NU17	MYO1A_HUMANUnconventional myosin-Ia OS=Homo sapiens GN=MYO1A PE=2 SV=1	927	tr|F1PD99|F1PD99_CANLFUncharacterized protein OS=Canis lupus familiaris GN=MYO1A PE=3 SV=2	F1PD99	0	100	1926.37	927	927
J9P5Z0	J9P5Z0_CANLFMyosin-1 OS=Canis lupus familiaris GN=MYH1 PE=4 SV=1	773	tr|J9P5Z0|J9P5Z0_CANLFMyosin-1 OS=Canis lupus familiaris GN=MYH1 PE=4 SV=1	J9P5Z0	0	100	1505.73	773	773
J9P992	L8YAK9_TUPCHMyosin-XVIIIa OS=Tupaia chinensis GN=TREES_T100003570 PE=3 SV=1	1945	tr|J9P992|J9P992_CANLFUncharacterized protein OS=Canis lupus familiaris GN=MYO18A PE=3 SV=1	J9P992	0	100	3970.62	1945	1945
GO, Gene Ontology; bp, biological process; mf, molecular function; cc, cellular component; OS, OrganismName; GN, GeneName; PE, protein existence; SV, SequenceVersion; Sequence desc, sequence description; Hit desc, hit description; Protein name and description; Hit ACC, protein ID number of the sequence; E-Value, reliability evaluation of the results; Similarity, positives/alignment; positives, nu…

## Sheet: protein2go
SeqName	Hit-Desc	GO-Group	GO-ID	Term
P60524	HBB_CHRBRHemoglobin subunit beta OS=Chrysocyon brachyurus GN=HBB PE=1 SV=1	C	GO:0005833	hemoglobin complex
P60524	HBB_CHRBRHemoglobin subunit beta OS=Chrysocyon brachyurus GN=HBB PE=1 SV=1	F	GO:0005506	iron ion binding
P60524	HBB_CHRBRHemoglobin subunit beta OS=Chrysocyon brachyurus GN=HBB PE=1 SV=1	F	GO:0019825	oxygen binding
P60524	HBB_CHRBRHemoglobin subunit beta OS=Chrysocyon brachyurus GN=HBB PE=1 SV=1	F	GO:0020037	heme binding
P60524	HBB_CHRBRHemoglobin subunit beta OS=Chrysocyon brachyurus GN=HBB PE=1 SV=1	P	GO:0015671	oxygen transport
P60529	HBA_CANLFHemoglobin subunit alpha OS=Canis lupus familiaris GN=HBA PE=1 SV=1	C	GO:0005833	hemoglobin complex
P60529	HBA_CANLFHemoglobin subunit alpha OS=Canis lupus familiaris GN=HBA PE=1 SV=1	F	GO:0005506	iron ion binding
P60529	HBA_CANLFHemoglobin subunit alpha OS=Canis lupus familiaris GN=HBA PE=1 SV=1	F	GO:0019825	oxygen binding
P60529	HBA_CANLFHemoglobin subunit alpha OS=Canis lupus familiaris GN=HBA PE=1 SV=1	F	GO:0020037	heme binding
P60529	HBA_CANLFHemoglobin subunit alpha OS=Canis lupus familiaris GN=HBA PE=1 SV=1	P	GO:0015671	oxygen transport
J9JHF7	HBA_CANLAHemoglobin subunit alpha OS=Canis latrans GN=HBA PE=1 SV=2	C	GO:0005833	hemoglobin complex
J9JHF7	HBA_CANLAHemoglobin subunit alpha OS=Canis latrans GN=HBA PE=1 SV=2	F	GO:0005506	iron ion binding
J9JHF7	HBA_CANLAHemoglobin subunit alpha OS=Canis latrans GN=HBA PE=1 SV=2	F	GO:0019825	oxygen binding
J9JHF7	HBA_CANLAHemoglobin subunit alpha OS=Canis latrans GN=HBA PE=1 SV=2	F	GO:0020037	heme binding
J9JHF7	HBA_CANLAHemoglobin subunit alpha OS=Canis latrans GN=HBA PE=1 SV=2	P	GO:0015671	oxygen transport
F1PJ74	F1PJ74_CANLFApolipo E OS=Canis lupus familiaris GN=APOE PE=3 SV=1	C	GO:0034358	plasma lipoprotein particle
F1PJ74	F1PJ74_CANLFApolipo E OS=Canis lupus familiaris GN=APOE PE=3 SV=1	C	GO:0043227	membrane-bounded organelle
F1PJ74	F1PJ74_CANLFApolipo E OS=Canis lupus familiaris GN=APOE PE=3 SV=1	C	GO:0044464	cell part
F1PJ74	F1PJ74_CANLFApolipo E OS=Canis lupus familiaris GN=APOE PE=3 SV=1	F	GO:0005515	protein binding
F1PJ74	F1PJ74_CANLFApolipo E OS=Canis lupus familiaris GN=APOE PE=3 SV=1	F	GO:0008289	lipid binding
F1PJ74	F1PJ74_CANLFApolipo E OS=Canis lupus familiaris GN=APOE PE=3 SV=1	P	GO:0008203	cholesterol metabolic process
F1PJ74	F1PJ74_CANLFApolipo E OS=Canis lupus familiaris GN=APOE PE=3 SV=1	P	GO:0009892	negative regulation of metabolic process
F1PJ74	F1PJ74_CANLFApolipo E OS=Canis lupus familiaris GN=APOE PE=3 SV=1	P	GO:0010975	regulation of neuron projection development
F1PJ74	F1PJ74_CANLFApolipo E OS=Canis lupus familiaris GN=APOE PE=3 SV=1	P	GO:0031325	positive regulation of cellular metabolic process
F1PJ74	F1PJ74_CANLFApolipo E OS=Canis lupus familiaris GN=APOE PE=3 SV=1	P	GO:0032268	regulation of cellular protein metabolic process
F1PJ74	F1PJ74_CANLFApolipo E OS=Canis lupus familiaris GN=APOE PE=3 SV=1	P	GO:0032374	regulation of cholesterol transport
F1PJ74	F1PJ74_CANLFApolipo E OS=Canis lupus familiaris GN=APOE PE=3 SV=1	P	GO:0034369	plasma lipoprotein particle remodeling
F1PJ74	F1PJ74_CANLFApolipo E OS=Canis lupus familiaris GN=APOE PE=3 SV=1	P	GO:0042157	lipoprotein metabolic process
F1PJ74	F1PJ74_CANLFApolipo E OS=Canis lupus familiaris GN=APOE PE=3 SV=1	P	GO:0046890	regulation of lipid biosynthetic process
F1PJ74	F1PJ74_CANLFApolipo E OS=Canis lupus familiaris GN=APOE PE=3 SV=1	P	GO:0048585	negative regulation of response to stimulus
F1PJ74	F1PJ74_CANLFApolipo E OS=Canis lupus familiaris GN=APOE PE=3 SV=1	P	GO:0050790	regulation of catalytic activity
F1PJ74	F1PJ74_CANLFApolipo E OS=Canis lupus familiaris GN=APOE PE=3 SV=1	P	GO:0050807	regulation of synapse organization
F1PJ74	F1PJ74_CANLFApolipo E OS=Canis lupus familiaris GN=APOE PE=3 SV=1	P	GO:0051129	negative regulation of cellular component organization
F1PJ74	F1PJ74_CANLFApolipo E OS=Canis lupus familiaris GN=APOE PE=3 SV=1	P	GO:0051130	positive regulation of cellular component organization
F1PJ74	F1PJ74_CANLFApolipo E OS=Canis lupus familiaris GN=APOE PE=3 SV=1	P	GO:0051241	negative regulation of multicellular organismal process
F1PJ74	F1PJ74_CANLFApolipo E OS=Canis lupus familiaris GN=APOE PE=3 SV=1	P	GO:0051716	cellular response to stimulus
F1PJ74	F1PJ74_CANLFApolipo E OS=Canis lupus familiaris GN=APOE PE=3 SV=1	P	GO:0055088	lipid homeostasis
F1PJ74	F1PJ74_CANLFApolipo E OS=Canis lupus familiaris GN=APOE PE=3 SV=1	P	GO:1901214	regulation of neuron death
F1PJ74	F1PJ74_CANLFApolipo E OS=Canis lupus familiaris GN=APOE PE=3 SV=1	P	GO:1901575	organic substance catabolic process
J9PBN6	L5KI66_PTEALAlpha-2-macroglobulin OS=Pteropus alecto GN=PAL_GLEAN10015609 PE=4 SV=1	C	GO:0005615	extracellular space
J9PBN6	L5KI66_PTEALAlpha-2-macroglobulin OS=Pteropus alecto GN=PAL_GLEAN10015609 PE=4 SV=1	F	GO:0004866	endopeptidase inhibitor activity
J9P8M2	J9P8M2_CANLFFibronectin OS=Canis lupus familiaris GN=FN1 PE=4 SV=1	C	GO:0044421	extracellular region part
J9P8M2	J9P8M2_CANLFFibronectin OS=Canis lupus familiaris GN=FN1 PE=4 SV=1	F	GO:0005515	protein binding
J9P8M2	J9P8M2_CANLFFibronectin OS=Canis lupus familiaris GN=FN1 PE=4 SV=1	P	GO:0048522	positive regulation of cellular process
F1P6H7	F1P6H7_CANLFFibronectin OS=Canis lupus familiaris GN=FN1 PE=4 SV=2	C	GO:0031012	extracellular matrix
F1P6H7	F1P6H7_CANLFFibronectin OS=Canis lupus familiaris GN=FN1 PE=4 SV=2	F	GO:0005515	protein binding
F1P6H7	F1P6H7_CANLFFibronectin OS=Canis lupus familiaris GN=FN1 PE=4 SV=2	P	GO:0007155	cell adhesion
F1P6H7	F1P6H7_CANLFFibronectin OS=Canis lupus familiaris GN=FN1 PE=4 SV=2	P	GO:0016043	cellular component organization
F1P6H7	F1P6H7_CANLFFibronectin OS=Canis lupus familiaris GN=FN1 PE=4 SV=2	P	GO:0044763	single-organism cellular process
F1P6H7	F1P6H7_CANLFFibronectin OS=Canis lupus familiaris GN=FN1 PE=4 SV=2	P	GO:0044767	single-organism developmental process
F1P6H7	F1P6H7_CANLFFibronectin OS=Canis lupus familiaris GN=FN1 PE=4 SV=2	P	GO:0048522	positive regulation of cellular process
F1P6H7	F1P6H7_CANLFFibronectin OS=Canis lupus familiaris GN=FN1 PE=4 SV=2	P	GO:0048856	anatomical structure development
F1P6H7	F1P6H7_CANLFFibronectin OS=Canis lupus familiaris GN=FN1 PE=4 SV=2	P	GO:0060255	regulation of macromolecule metabolic process
E2QYB2	E2QYB2_CANLFUncharacterized protein OS=Canis lupus familiaris PE=4 SV=2	F	GO:0005515	protein binding
E2QYB2	E2QYB2_CANLFUncharacterized protein OS=Canis lupus familiaris PE=4 SV=2	P	GO:0002376	immune system process
P00011	G4XXS8_CANLUCytochrome c OS=Canis lupus GN=CYCS PE=3 SV=1	C	GO:0005739	mitochondrion
P00011	G4XXS8_CANLUCytochrome c OS=Canis lupus GN=CYCS PE=3 SV=1	F	GO:0009055	electron carrier activity
P00011	G4XXS8_CANLUCytochrome c OS=Canis lupus GN=CYCS PE=3 SV=1	F	GO:0020037	heme binding
P00011	G4XXS8_CANLUCytochrome c OS=Canis lupus GN=CYCS PE=3 SV=1	P	GO:0042775	mitochondrial ATP synthesis coupled electron transport
P00011	G4XXS8_CANLUCytochrome c OS=Canis lupus GN=CYCS PE=3 SV=1	P	GO:0006118	electron transport
E2R7A3	U6DIQ6_NEOVIComplement factor I (Fragment) OS=Neovison vison GN=E7ETH0 PE=2 SV=1	C	GO:0016020	membrane
E2R7A3	U6DIQ6_NEOVIComplement factor I (Fragment) OS=Neovison vison GN=E7ETH0 PE=2 SV=1	F	GO:0004252	serine-type endopeptidase activity
E2R7A3	U6DIQ6_NEOVIComplement factor I (Fragment) OS=Neovison vison GN=E7ETH0 PE=2 SV=1	F	GO:0005044	scavenger receptor activity
E2R7A3	U6DIQ6_NEOVIComplement factor I (Fragment) OS=Neovison vison GN=E7ETH0 PE=2 SV=1	F	GO:0005515	protein binding
E2R7A3	U6DIQ6_NEOVIComplement factor I (Fragment) OS=Neovison vison GN=E7ETH0 PE=2 SV=1	P	GO:0006508	proteolysis
E2R7A3	U6DIQ6_NEOVIComplement factor I (Fragment) OS=Neovison vison GN=E7ETH0 PE=2 SV=1	P	GO:0007165	signal transduction
F1PDY8	M1EKL8_MUSPFCarbonic anhydrase II (Fragment) OS=Mustela putorius furo PE=2 SV=1	C	GO:0044464	cell part
F1PDY8	M1EKL8_MUSPFCarbonic anhydrase II (Fragment) OS=Mustela putorius furo PE=2 SV=1	P	GO:0042221	response to chemical stimulus
F1PDY8	M1EKL8_MUSPFCarbonic anhydrase II (Fragment) OS=Mustela putorius furo PE=2 SV=1	P	GO:0044763	single-organism cellular process
F1PDY8	M1EKL8_MUSPFCarbonic anhydrase II (Fragment) OS=Mustela putorius furo PE=2 SV=1	P	GO:0048518	positive regulation of biological process
F1PDY8	M1EKL8_MUSPFCarbonic anhydrase II (Fragment) OS=Mustela putorius furo PE=2 SV=1	P	GO:0050794	regulation of cellular process
F1PNY4	F1PNY4_CANLFKeratinocyte differentiation-associated OS=Canis lupus familiaris GN=KRTDAP PE=4 SV=2	C	GO:0005576	extracellular region
E2R4H4	Q5U0A0_HUMANProteasome subunit alpha type OS=Homo sapiens PE=2 SV=1	C	GO:0005839	proteasome core complex
E2R4H4	Q5U0A0_HUMANProteasome subunit alpha type OS=Homo sapiens PE=2 SV=1	F	GO:0004298	threonine-type endopeptidase activity
E2R4H4	Q5U0A0_HUMANProteasome subunit alpha type OS=Homo sapiens PE=2 SV=1	P	GO:0051603	proteolysis involved in cellular protein catabolic process
J9NVE9	J9NVE9_CANLFSerum amyloid A OS=Canis lupus familiaris GN=LOC102155886 PE=3 SV=1	C	GO:0005576	extracellular region
J9NVE9	J9NVE9_CANLFSerum amyloid A OS=Canis lupus familiaris GN=LOC102155886 PE=3 SV=1	P	GO:0006953	acute-phase response
J9NVE9	J9NVE9_CANLFSerum amyloid A OS=Canis lupus familiaris GN=LOC102155886 PE=3 SV=1	P	GO:0010739	positive regulation of protein kinase A signaling cascade
J9NVE9	J9NVE9_CANLFSerum amyloid A OS=Canis lupus familiaris GN=LOC102155886 PE=3 SV=1	P	GO:0033138	positive regulation of peptidyl-serine phosphorylation
J9NVE9	J9NVE9_CANLFSerum amyloid A OS=Canis lupus familiaris GN=LOC102155886 PE=3 SV=1	P	GO:0042221	response to chemical stimulus
J9NVE9	J9NVE9_CANLFSerum amyloid A OS=Canis lupus familiaris GN=LOC102155886 PE=3 SV=1	P	GO:0044242	cellular lipid catabolic process
J9NVE9	J9NVE9_CANLFSerum amyloid A OS=Canis lupus familiaris GN=LOC102155886 PE=3 SV=1	P	GO:0045892	negative regulation of transcription, DNA-dependent
J9NVE9	J9NVE9_CANLFSerum amyloid A OS=Canis lupus familiaris GN=LOC102155886 PE=3 SV=1	P	GO:0050996	positive regulation of lipid catabolic process
J9NVE9	J9NVE9_CANLFSerum amyloid A OS=Canis lupus familiaris GN=LOC102155886 PE=3 SV=1	P	GO:0070374	positive regulation of ERK1 and ERK2 cascade
J9P9B9	L9JM01_TUPCHIg kappa chain V-II region RPMI 6410 OS=Tupaia chinensis GN=TREES_T100021696 PE=4 SV=1	F	GO:0005515	protein binding
J9P9B9	L9JM01_TUPCHIg kappa chain V-II region RPMI 6410 OS=Tupaia chinensis GN=TREES_T100021696 PE=4 SV=1	P	GO:0002376	immune system process
J9NS29	J9NS29_CANLFCystatin OS=Canis lupus familiaris GN=LOC607874 PE=3 SV=1	F	GO:0004869	cysteine-type endopeptidase inhibitor activity
J9NS29	J9NS29_CANLFCystatin OS=Canis lupus familiaris GN=LOC607874 PE=3 SV=1	P	GO:0010605	negative regulation of macromolecule metabolic process
J9NS29	J9NS29_CANLFCystatin OS=Canis lupus familiaris GN=LOC607874 PE=3 SV=1	P	GO:0031324	negative regulation of cellular metabolic process
F1P8V6	F1P8V6_CANLFMyoglobin OS=Canis lupus familiaris GN=MB PE=3 SV=1	F	GO:0019825	oxygen binding
F1P8V6	F1P8V6_CANLFMyoglobin OS=Canis lupus familiaris GN=MB PE=3 SV=1	F	GO:0020037	heme binding
F1P8V6	F1P8V6_CANLFMyoglobin OS=Canis lupus familiaris GN=MB PE=3 SV=1	P	GO:0015671	oxygen transport
J9P4B4	S7MGY1_MYOBRComplement C1q subcomponent subunit A OS=Myotis brandtii GN=D623_10012686 PE=4 SV=1	C	GO:0043234	protein complex
J9P4B4	S7MGY1_MYOBRComplement C1q subcomponent subunit A OS=Myotis brandtii GN=D623_10012686 PE=4 SV=1	C	GO:0070062	extracellular vesicular exosome
J9P4B4	S7MGY1_MYOBRComplement C1q subcomponent subunit A OS=Myotis brandtii GN=D623_10012686 PE=4 SV=1	F	GO:0005515	protein binding
J9P4B4	S7MGY1_MYOBRComplement C1q subcomponent subunit A OS=Myotis brandtii GN=D623_10012686 PE=4 SV=1	P	GO:0006956	complement activation
F1PYZ1	gamma A (Fragment) OS=Mustela putorius furo PE=2 SV=1	C	GO:0005833	hemoglobin complex
F1PYZ1	gamma A (Fragment) OS=Mustela putorius furo PE=2 SV=1	F	GO:0005506	iron ion binding
F1PYZ1	gamma A (Fragment) OS=Mustela putorius furo PE=2 SV=1	F	GO:0019825	oxygen binding
F1PYZ1	gamma A (Fragment) OS=Mustela putorius furo PE=2 SV=1	F	GO:0020037	heme binding
F1PYZ1	gamma A (Fragment) OS=Mustela putorius furo PE=2 SV=1	P	GO:0015671	oxygen transport
E2QUU8	L5KZ88_PTEALIg lambda chain V region 4A OS=Pteropus alecto GN=PAL_GLEAN10000188 PE=4 SV=1	F	GO:0005515	protein binding
E2QUU8	L5KZ88_PTEALIg lambda chain V region 4A OS=Pteropus alecto GN=PAL_GLEAN10000188 PE=4 SV=1	P	GO:0002376	immune system process
F1Q0N9	A0A0K2A1G0_CASFIKeratin 19 OS=Castor fiber PE=2 SV=1	C	GO:0005882	intermediate filament
F1Q0N9	A0A0K2A1G0_CASFIKeratin 19 OS=Castor fiber PE=2 SV=1	C	GO:0071944	cell periphery
F1Q0N9	A0A0K2A1G0_CASFIKeratin 19 OS=Castor fiber PE=2 SV=1	F	GO:0005198	structural molecule activity
F1P8A6	G7Q2X0_MACFA Z39Ig OS=Macaca fascicularis GN=EGM_18851 PE=4 SV=1	C	GO:0016020	membrane
F1P8A6	G7Q2X0_MACFA Z39Ig OS=Macaca fascicularis GN=EGM_18851 PE=4 SV=1	F	GO:0005515	protein binding
J9NYN2	CSRP1_RATCysteine and glycine-rich 1 OS=Rattus norvegicus GN=Csrp1 PE=1 SV=2	C	GO:0043227	membrane-bounded organelle
J9NYN2	CSRP1_RATCysteine and glycine-rich 1 OS=Rattus norvegicus GN=Csrp1 PE=1 SV=2	F	GO:0008270	zinc ion binding
Q0QEN2	L5KVR4_PTEALATP synthase subunit beta OS=Pteropus alecto GN=PAL_GLEAN10004833 PE=3 SV=1	C	GO:0033178	proton-transporting two-sector ATPase complex, catalytic domain
Q0QEN2	L5KVR4_PTEALATP synthase subunit beta OS=Pteropus alecto GN=PAL_GLEAN10004833 PE=3 SV=1	C	GO:0044429	mitochondrial part
Q0QEN2	L5KVR4_PTEALATP synthase subunit beta OS=Pteropus alecto GN=PAL_GLEAN10004833 PE=3 SV=1	F	GO:0005524	ATP binding
Q0QEN2	L5KVR4_PTEALATP synthase subunit beta OS=Pteropus alecto GN=PAL_GLEAN10004833 PE=3 SV=1	F	GO:0046933	proton-transporting ATP synthase activity, rotational mechanism
Q0QEN2	L5KVR4_PTEALATP synthase subunit beta OS=Pteropus alecto GN=PAL_GLEAN10004833 PE=3 SV=1	P	GO:0015986	ATP synthesis coupled proton transport
Q0QEN2	L5KVR4_PTEALATP synthase subunit beta OS=Pteropus alecto GN=PAL_GLEAN10004833 PE=3 SV=1	P	GO:0015991	ATP hydrolysis coupled proton transport
Q0QEN2	L5KVR4_PTEALATP synthase subunit beta OS=Pteropus alecto GN=PAL_GLEAN10004833 PE=3 SV=1	C	GO:0045259	proton-transporting ATP synthase complex
J9NZW6	L8I3W2_9CETAApolipo F (Fragment) OS=Bos mutus GN=M91_19740 PE=4 SV=1	C	GO:0016021	integral to membrane
E2RKW4	M1EPH8_MUSPFCysteine-rich secretory 3 (Fragment) OS=Mustela putorius furo PE=2 SV=1	C	GO:0005576	extracellular region
E2QW34	M3YTX0_MUSPFProteasome subunit beta type OS=Mustela putorius furo GN=PSMB2 PE=3 SV=1	C	GO:0005839	proteasome core complex
E2QW34	M3YTX0_MUSPFProteasome subunit beta type OS=Mustela putorius furo GN=PSMB2 PE=3 SV=1	F	GO:0004298	threonine-type endopeptidase activity
E2QW34	M3YTX0_MUSPFProteasome subunit beta type OS=Mustela putorius furo GN=PSMB2 PE=3 SV=1	P	GO:0051603	proteolysis involved in cellular protein catabolic process
E2R5H4	G5BBQ5_HETGAIntegrin-linked kinase OS=Heterocephalus glaber GN=ILK PE=4 SV=1	F	GO:0004672	protein kinase activity
E2R5H4	G5BBQ5_HETGAIntegrin-linked kinase OS=Heterocephalus glaber GN=ILK PE=4 SV=1	F	GO:0005515	protein binding
E2R5H4	G5BBQ5_HETGAIntegrin-linked kinase OS=Heterocephalus glaber GN=ILK PE=4 SV=1	F	GO:0005524	ATP binding
E2R5H4	G5BBQ5_HETGAIntegrin-linked kinase OS=Heterocephalus glaber GN=ILK PE=4 SV=1	P	GO:0006468	protein phosphorylation
E2R5H4	G5BBQ5_HETGAIntegrin-linked kinase OS=Heterocephalus glaber GN=ILK PE=4 SV=1	P	GO:0044763	single-organism cellular process
E2R5H4	G5BBQ5_HETGAIntegrin-linked kinase OS=Heterocephalus glaber GN=ILK PE=4 SV=1	P	GO:0048522	positive regulation of cellular process
E2R5H4	G5BBQ5_HETGAIntegrin-linked kinase OS=Heterocephalus glaber GN=ILK PE=4 SV=1	P	GO:0048731	system development
J9PB81	A0A061IJ91_CRIGRCathepsin G OS=Cricetulus griseus GN=H671_1g4192 PE=3 SV=1	C	GO:0005737	cytoplasm
J9PB81	A0A061IJ91_CRIGRCathepsin G OS=Cricetulus griseus GN=H671_1g4192 PE=3 SV=1	C	GO:0043231	intracellular membrane-bounded organelle
J9PB81	A0A061IJ91_CRIGRCathepsin G OS=Cricetulus griseus GN=H671_1g4192 PE=3 SV=1	F	GO:0004252	serine-type endopeptidase activity
J9PB81	A0A061IJ91_CRIGRCathepsin G OS=Cricetulus griseus GN=H671_1g4192 PE=3 SV=1	P	GO:0002376	immune system process
J9PB81	A0A061IJ91_CRIGRCathepsin G OS=Cricetulus griseus GN=H671_1g4192 PE=3 SV=1	P	GO:0006508	proteolysis
J9PB81	A0A061IJ91_CRIGRCathepsin G OS=Cricetulus griseus GN=H671_1g4192 PE=3 SV=1	P	GO:0051707	response to other organism
E2QXH0	U6CSB5_NEOVIPhospholipase A1 member A OS=Neovison vison GN=PLA1A PE=2 SV=1	C	GO:0005576	extracellular region
E2QXH0	U6CSB5_NEOVIPhospholipase A1 member A OS=Neovison vison GN=PLA1A PE=2 SV=1	C	GO:0031988	membrane-bounded vesicle
E2QXH0	U6CSB5_NEOVIPhospholipase A1 member A OS=Neovison vison GN=PLA1A PE=2 SV=1	F	GO:0052689	carboxylic ester hydrolase activity
E2QXH0	U6CSB5_NEOVIPhospholipase A1 member A OS=Neovison vison GN=PLA1A PE=2 SV=1	P	GO:0006629	lipid metabolic process
C4MW55	C4MW55_CANLFCytochrome c oxidase subunit 2 OS=Canis lupus familiaris GN=COX2 PE=3 SV=1	C	GO:0016021	integral to membrane
C4MW55	C4MW55_CANLFCytochrome c oxidase subunit 2 OS=Canis lupus familiaris GN=COX2 PE=3 SV=1	F	GO:0004129	cytochrome-c oxidase activity
C4MW55	C4MW55_CANLFCytochrome c oxidase subunit 2 OS=Canis lupus familiaris GN=COX2 PE=3 SV=1	F	GO:0005507	copper ion binding
C4MW55	C4MW55_CANLFCytochrome c oxidase subunit 2 OS=Canis lupus familiaris GN=COX2 PE=3 SV=1	P	GO:0006123	mitochondrial electron transport, cytochrome c to oxygen
C4MW55	C4MW55_CANLFCytochrome c oxidase subunit 2 OS=Canis lupus familiaris GN=COX2 PE=3 SV=1	P	GO:0015992	proton transport
C4MW55	C4MW55_CANLFCytochrome c oxidase subunit 2 OS=Canis lupus familiaris GN=COX2 PE=3 SV=1	C	GO:0045277	respiratory chain complex IV
F6Y5M8	L5KT98_PTEALUPF0566 OS=Pteropus alecto GN=PAL_GLEAN10021244 PE=4 SV=1	F	GO:0002161	aminoacyl-tRNA editing activity
F6Y5M8	L5KT98_PTEALUPF0566 OS=Pteropus alecto GN=PAL_GLEAN10021244 PE=4 SV=1	P	GO:0006450	regulation of translational fidelity
F1PIF2	A0A091DGR2_FUKDACathepsin Z OS=Fukomys damarensis GN=H920_07249 PE=3 SV=1	C	GO:0043231	intracellular membrane-bounded organelle
F1PIF2	A0A091DGR2_FUKDACathepsin Z OS=Fukomys damarensis GN=H920_07249 PE=3 SV=1	C	GO:0044421	extracellular region part
F1PIF2	A0A091DGR2_FUKDACathepsin Z OS=Fukomys damarensis GN=H920_07249 PE=3 SV=1	C	GO:0044444	cytoplasmic part
F1PIF2	A0A091DGR2_FUKDACathepsin Z OS=Fukomys damarensis GN=H920_07249 PE=3 SV=1	F	GO:0008234	cysteine-type peptidase activity
F1PIF2	A0A091DGR2_FUKDACathepsin Z OS=Fukomys damarensis GN=H920_07249 PE=3 SV=1	P	GO:0006508	proteolysis
L7N0L9	KCRB_CANLFCreatine kinase B-type OS=Canis lupus familiaris GN=CKB PE=1 SV=1	F	GO:0016301	kinase activity
F1PGC3	K9K225_HORSEInterferon-induced wit tetratricopeptide repeats 2 OS=Equus caballus PE=2 SV=1	F	GO:0003723	RNA binding
F1PGC3	K9K225_HORSEInterferon-induced wit tetratricopeptide repeats 2 OS=Equus caballus PE=2 SV=1	F	GO:0005515	protein binding
F1PGC3	K9K225_HORSEInterferon-induced wit tetratricopeptide repeats 2 OS=Equus caballus PE=2 SV=1	P	GO:0009615	response to virus
F1PGC3	K9K225_HORSEInterferon-induced wit tetratricopeptide repeats 2 OS=Equus caballus PE=2 SV=1	P	GO:0035457	cellular response to interferon-alpha
E2RLF1	L5KDZ0_PTEALProactivator polypeptide OS=Pteropus alecto GN=PAL_GLEAN10020518 PE=4 SV=1	C	GO:0005764	lysosome
E2RLF1	L5KDZ0_PTEALProactivator polypeptide OS=Pteropus alecto GN=PAL_GLEAN10020518 PE=4 SV=1	C	GO:0044421	extracellular region part
E2RLF1	L5KDZ0_PTEALProactivator polypeptide OS=Pteropus alecto GN=PAL_GLEAN10020518 PE=4 SV=1	P	GO:0006665	sphingolipid metabolic process
E2RLF1	L5KDZ0_PTEALProactivator polypeptide OS=Pteropus alecto GN=PAL_GLEAN10020518 PE=4 SV=1	P	GO:0030850	prostate gland development
E2RLF1	L5KDZ0_PTEALProactivator polypeptide OS=Pteropus alecto GN=PAL_GLEAN10020518 PE=4 SV=1	P	GO:0048589	developmental growth
E2RLF1	L5KDZ0_PTEALProactivator polypeptide OS=Pteropus alecto GN=PAL_GLEAN10020518 PE=4 SV=1	P	GO:0050794	regulation of cellular process
E2RLF1	L5KDZ0_PTEALProactivator polypeptide OS=Pteropus alecto GN=PAL_GLEAN10020518 PE=4 SV=1	P	GO:0051716	cellular response to stimulus
E2RLF1	L5KDZ0_PTEALProactivator polypeptide OS=Pteropus alecto GN=PAL_GLEAN10020518 PE=4 SV=1	P	GO:0080090	regulation of primary metabolic process
E2R997	U6CU16_NEOVIPhenazine biosynthesis-like domain-containing OS=Neovison vison GN=PBLD PE=2 SV=1	F	GO:0003824	catalytic activity
E2R997	U6CU16_NEOVIPhenazine biosynthesis-like domain-containing OS=Neovison vison GN=PBLD PE=2 SV=1	P	GO:0009058	biosynthetic process
E2R997	U6CU16_NEOVIPhenazine biosynthesis-like domain-containing OS=Neovison vison GN=PBLD PE=2 SV=1	P	GO:0065007	biological regulation
E2R357	D5K8A6_PIGSperm associated antigen 4 OS=Sus scrofa GN=SPAG4L PE=2 SV=1	P	GO:0006996	organelle organization
E2R357	D5K8A6_PIGSperm associated antigen 4 OS=Sus scrofa GN=SPAG4L PE=2 SV=1	P	GO:0007283	spermatogenesis
E2R357	D5K8A6_PIGSperm associated antigen 4 OS=Sus scrofa GN=SPAG4L PE=2 SV=1	P	GO:0044763	single-organism cellular process
F1PB77	F1PB77_CANLFAlpha-1,4 glucan phosphorylase OS=Canis lupus familiaris GN=PYGL PE=3 SV=2	C	GO:0044464	cell part
F1PB77	F1PB77_CANLFAlpha-1,4 glucan phosphorylase OS=Canis lupus familiaris GN=PYGL PE=3 SV=2	F	GO:0008184	glycogen phosphorylase activity
F1PB77	F1PB77_CANLFAlpha-1,4 glucan phosphorylase OS=Canis lupus familiaris GN=PYGL PE=3 SV=2	F	GO:0030170	pyridoxal phosphate binding
F1PB77	F1PB77_CANLFAlpha-1,4 glucan phosphorylase OS=Canis lupus familiaris GN=PYGL PE=3 SV=2	F	GO:0036094	small molecule binding
F1PB77	F1PB77_CANLFAlpha-1,4 glucan phosphorylase OS=Canis lupus familiaris GN=PYGL PE=3 SV=2	F	GO:0097159	organic cyclic compound binding
F1PB77	F1PB77_CANLFAlpha-1,4 glucan phosphorylase OS=Canis lupus familiaris GN=PYGL PE=3 SV=2	F	GO:1901363	heterocyclic compound binding
F1PB77	F1PB77_CANLFAlpha-1,4 glucan phosphorylase OS=Canis lupus familiaris GN=PYGL PE=3 SV=2	P	GO:0005977	glycogen metabolic process
E2RL75	L5JNT1_PTEALIntegrator complex subunit 4 OS=Pteropus alecto GN=PAL_GLEAN10025536 PE=4 SV=1	C	GO:0032039	integrator complex
E2RL75	L5JNT1_PTEALIntegrator complex subunit 4 OS=Pteropus alecto GN=PAL_GLEAN10025536 PE=4 SV=1	F	GO:0005488	binding
E2RL75	L5JNT1_PTEALIntegrator complex subunit 4 OS=Pteropus alecto GN=PAL_GLEAN10025536 PE=4 SV=1	P	GO:0016180	snRNA processing
J9NU17	MYO1A_HUMANUnconventional myosin-Ia OS=Homo sapiens GN=MYO1A PE=2 SV=1	C	GO:0005902	microvillus
J9NU17	MYO1A_HUMANUnconventional myosin-Ia OS=Homo sapiens GN=MYO1A PE=2 SV=1	C	GO:0005903	brush border
J9NU17	MYO1A_HUMANUnconventional myosin-Ia OS=Homo sapiens GN=MYO1A PE=2 SV=1	C	GO:0016323	basolateral plasma membrane
J9NU17	MYO1A_HUMANUnconventional myosin-Ia OS=Homo sapiens GN=MYO1A PE=2 SV=1	C	GO:0016328	lateral plasma membrane
J9NU17	MYO1A_HUMANUnconventional myosin-Ia OS=Homo sapiens GN=MYO1A PE=2 SV=1	C	GO:0016459	myosin complex
J9NU17	MYO1A_HUMANUnconventional myosin-Ia OS=Homo sapiens GN=MYO1A PE=2 SV=1	C	GO:0030864	cortical actin cytoskeleton
J9NU17	MYO1A_HUMANUnconventional myosin-Ia OS=Homo sapiens GN=MYO1A PE=2 SV=1	C	GO:0031941	filamentous actin
J9NU17	MYO1A_HUMANUnconventional myosin-Ia OS=Homo sapiens GN=MYO1A PE=2 SV=1	F	GO:0003774	motor activity
J9NU17	MYO1A_HUMANUnconventional myosin-Ia OS=Homo sapiens GN=MYO1A PE=2 SV=1	F	GO:0005515	protein binding
J9NU17	MYO1A_HUMANUnconventional myosin-Ia OS=Homo sapiens GN=MYO1A PE=2 SV=1	F	GO:0005524	ATP binding
J9NU17	MYO1A_HUMANUnconventional myosin-Ia OS=Homo sapiens GN=MYO1A PE=2 SV=1	P	GO:0007605	sensory perception of sound
J9NU17	MYO1A_HUMANUnconventional myosin-Ia OS=Homo sapiens GN=MYO1A PE=2 SV=1	P	GO:0051648	vesicle localization
J9P5Z0	J9P5Z0_CANLFMyosin-1 OS=Canis lupus familiaris GN=MYH1 PE=4 SV=1	C	GO:0005737	cytoplasm
J9P5Z0	J9P5Z0_CANLFMyosin-1 OS=Canis lupus familiaris GN=MYH1 PE=4 SV=1	C	GO:0016459	myosin complex
J9P5Z0	J9P5Z0_CANLFMyosin-1 OS=Canis lupus familiaris GN=MYH1 PE=4 SV=1	F	GO:0003774	motor activity
J9P992	L8YAK9_TUPCHMyosin-XVIIIa OS=Tupaia chinensis GN=TREES_T100003570 PE=3 SV=1	C	GO:0016459	myosin complex
J9P992	L8YAK9_TUPCHMyosin-XVIIIa OS=Tupaia chinensis GN=TREES_T100003570 PE=3 SV=1	F	GO:0003774	motor activity
J9P992	L8YAK9_TUPCHMyosin-XVIIIa OS=Tupaia chinensis GN=TREES_T100003570 PE=3 SV=1	F	GO:0005524	ATP binding
J9P992	L8YAK9_TUPCHMyosin-XVIIIa OS=Tupaia chinensis GN=TREES_T100003570 PE=3 SV=1	F	GO:0051015	actin filament binding
J9P992	L8YAK9_TUPCHMyosin-XVIIIa OS=Tupaia chinensis GN=TREES_T100003570 PE=3 SV=1	P	GO:0006996	organelle organization

## Sheet: bp
Level	GO ID	Term	GO Type	#Seqs	Sequence Names
1	GO:0008150	biological_process	Biological Process	34	E2RL75, E2QYB2, J9P9B9, F1PYZ1, J9NVE9, F1PJ74, F1P6H7, J9P4B4, C4MW55, E2QUU8, J9NU17, J9JHF7, J9P8M2, J9PB81, F1PDY8, E2RLF1, F1PIF2, E2R7A3, P60529, F6Y5M8, E2QW34, E2R357, J9NS29, Q0QEN2, F1PB77, E2R997, E2R5H4, E2QXH0, F1PGC3, F1P8V6, J9P992, E2R4H4, P00011, P60524
2	GO:0071840	cellular component organization or biogenesis	Biological Process	4	E2R357, F1PJ74, F1P6H7, J9P992
2	GO:0051179	localization	Biological Process	9	F1PYZ1, P60529, J9NU17, J9JHF7, Q0QEN2, F1P8V6, F1PJ74, C4MW55, P60524
2	GO:0040007	growth	Biological Process	1	E2RLF1
2	GO:0048519	negative regulation of biological process	Biological Process	3	J9NVE9, J9NS29, F1PJ74
2	GO:0000003	reproduction	Biological Process	2	E2R357, E2RLF1
2	GO:0008152	metabolic process	Biological Process	20	E2RL75, E2R7A3, F6Y5M8, J9NVE9, F1PJ74, F1P6H7, J9P4B4, C4MW55, E2QW34, Q0QEN2, J9PB81, J9NS29, F1PB77, E2RLF1, E2R997, E2QXH0, E2R5H4, F1PIF2, E2R4H4, P00011
2	GO:0022610	biological adhesion	Biological Process	1	F1P6H7
2	GO:0032502	developmental process	Biological Process	4	E2RLF1, E2R5H4, F1PJ74, F1P6H7
2	GO:0065007	biological regulation	Biological Process	12	E2R7A3, F6Y5M8, J9P8M2, J9NVE9, J9NS29, F1PDY8, E2RLF1, E2R997, F1PJ74, E2R5H4, F1P6H7, J9P4B4
2	GO:0009987	cellular process	Biological Process	20	E2RL75, E2R7A3, F6Y5M8, J9NVE9, F1PJ74, F1P6H7, C4MW55, E2QW34, J9P8M2, Q0QEN2, E2R357, J9NS29, F1PDY8, F1PB77, E2RLF1, F1PGC3, E2R5H4, E2R4H4, P00011, J9P992
2	GO:0050896	response to stimulus	Biological Process	8	E2R7A3, J9NVE9, F1PDY8, J9PB81, E2RLF1, F1PGC3, F1PJ74, J9P4B4
2	GO:0032501	multicellular organismal process	Biological Process	5	J9NU17, E2R357, E2RLF1, E2R5H4, F1PJ74
2	GO:0044699	single-organism process	Biological Process	18	F1PYZ1, E2R7A3, P60529, J9NVE9, F1PJ74, F1P6H7, C4MW55, J9JHF7, Q0QEN2, F1PDY8, E2R357, F1PB77, E2RLF1, E2R5H4, E2QXH0, F1P8V6, P60524, P00011
2	GO:0022414	reproductive process	Biological Process	2	E2R357, E2RLF1
2	GO:0023052	signaling	Biological Process	2	E2R7A3, J9NVE9
2	GO:0002376	immune system process	Biological Process	5	E2QYB2, J9P9B9, E2QUU8, J9PB81, J9P4B4
2	GO:0050789	regulation of biological process	Biological Process	11	E2R7A3, F6Y5M8, J9P8M2, J9NVE9, J9NS29, F1PDY8, E2RLF1, F1PJ74, E2R5H4, F1P6H7, J9P4B4
2	GO:0048518	positive regulation of biological process	Biological Process	7	J9P8M2, J9NVE9, F1PDY8, F1PJ74, E2R5H4, J9P4B4, F1P6H7
2	GO:0051704	multi-organism process	Biological Process	3	J9PB81, E2R357, F1PGC3
3	GO:0051234	establishment of localization	Biological Process	8	F1PYZ1, P60529, J9JHF7, Q0QEN2, F1P8V6, F1PJ74, C4MW55, P60524
3	GO:0044237	cellular metabolic process	Biological Process	13	E2RL75, F6Y5M8, J9NVE9, F1PJ74, C4MW55, E2QW34, J9NS29, Q0QEN2, F1PB77, E2RLF1, E2R5H4, E2R4H4, P00011
3	GO:0051707	response to other organism	Biological Process	2	J9PB81, F1PGC3
3	GO:0002682	regulation of immune system process	Biological Process	1	J9P4B4
3	GO:0019222	regulation of metabolic process	Biological Process	6	F6Y5M8, J9NVE9, J9NS29, E2RLF1, F1PJ74, F1P6H7
3	GO:0009607	response to biotic stimulus	Biological Process	2	J9PB81, F1PGC3
3	GO:0048609	multicellular organismal reproductive process	Biological Process	1	E2R357
3	GO:0006955	immune response	Biological Process	1	J9P4B4
3	GO:0044707	single-multicellular organism process	Biological Process	3	E2RLF1, E2R5H4, F1PJ74
3	GO:0003008	system process	Biological Process	1	J9NU17
3	GO:0009058	biosynthetic process	Biological Process	5	F6Y5M8, J9NVE9, Q0QEN2, E2R997, F1PJ74
3	GO:0097006	regulation of plasma lipoprotein particle levels	Biological Process	1	F1PJ74
3	GO:0042221	response to chemical	Biological Process	3	F1PDY8, J9NVE9, F1PGC3
3	GO:0007155	cell adhesion	Biological Process	1	F1P6H7
3	GO:0048584	positive regulation of response to stimulus	Biological Process	2	J9NVE9, J9P4B4
3	GO:0044700	single organism signaling	Biological Process	2	E2R7A3, J9NVE9
3	GO:0065008	regulation of biological quality	Biological Process	2	F6Y5M8, F1PJ74
3	GO:0048589	developmental growth	Biological Process	1	E2RLF1
3	GO:0051716	cellular response to stimulus	Biological Process	5	E2R7A3, J9NVE9, E2RLF1, F1PGC3, F1PJ74
3	GO:0044767	single-organism developmental process	Biological Process	4	E2RLF1, E2R5H4, F1PJ74, F1P6H7
3	GO:0009892	negative regulation of metabolic process	Biological Process	3	J9NVE9, J9NS29, F1PJ74
3	GO:0032879	regulation of localization	Biological Process	1	F1PJ74
3	GO:0002684	positive regulation of immune system process	Biological Process	1	J9P4B4
3	GO:0048522	positive regulation of cellular process	Biological Process	5	J9P8M2, J9NVE9, F1PJ74, E2R5H4, F1P6H7
3	GO:0051641	cellular localization	Biological Process	1	J9NU17
3	GO:0048856	anatomical structure development	Biological Process	4	E2RLF1, E2R5H4, F1PJ74, F1P6H7
3	GO:0051239	regulation of multicellular organismal process	Biological Process	1	F1PJ74
3	GO:0065009	regulation of molecular function	Biological Process	1	F1PJ74
3	GO:0009605	response to external stimulus	Biological Process	2	J9PB81, F1PGC3
3	GO:0048585	negative regulation of response to stimulus	Biological Process	1	F1PJ74
3	GO:0050794	regulation of cellular process	Biological Process	10	E2R7A3, F6Y5M8, J9P8M2, J9NVE9, J9NS29, F1PDY8, E2RLF1, F1PJ74, E2R5H4, F1P6H7
3	GO:0016043	cellular component organization	Biological Process	4	E2R357, F1PJ74, F1P6H7, J9P992
3	GO:0006950	response to stress	Biological Process	1	J9NVE9
3	GO:0023051	regulation of signaling	Biological Process	1	J9NVE9
3	GO:0044764	multi-organism cellular process	Biological Process	1	F1PGC3
3	GO:0050793	regulation of developmental process	Biological Process	1	F1PJ74
3	GO:0048523	negative regulation of cellular process	Biological Process	3	J9NS29, J9NVE9, F1PJ74
3	GO:0002253	activation of immune response	Biological Process	1	J9P4B4
3	GO:0044419	interspecies interaction between organisms	Biological Process	1	F1PGC3
3	GO:0048583	regulation of response to stimulus	Biological Process	3	J9NVE9, F1PJ74, J9P4B4
3	GO:0009893	positive regulation of metabolic process	Biological Process	2	J9NVE9, F1PJ74
3	GO:0023056	positive regulation of signaling	Biological Process	1	J9NVE9
3	GO:0044702	single organism reproductive process	Biological Process	2	E2R357, E2RLF1
3	GO:0044710	single-organism metabolic process	Biological Process	8	Q0QEN2, J9NVE9, F1PB77, E2RLF1, F1PJ74, E2QXH0, P00011, C4MW55
3	GO:0033036	macromolecule localization	Biological Process	1	F1PJ74
3	GO:0072376	protein activation cascade	Biological Process	1	J9P4B4
3	GO:0044238	primary metabolic process	Biological Process	17	E2RL75, E2R7A3, F6Y5M8, J9NVE9, F1PJ74, J9P4B4, C4MW55, E2QW34, Q0QEN2, J9PB81, F1PB77, E2RLF1, E2QXH0, E2R5H4, F1PIF2, E2R4H4, P00011
3	GO:0003006	developmental process involved in reproduction	Biological Process	1	E2RLF1
3	GO:0051241	negative regulation of multicellular organismal process	Biological Process	1	F1PJ74
3	GO:0032504	multicellular organism reproduction	Biological Process	1	E2R357
3	GO:0002252	immune effector process	Biological Process	1	J9P4B4
3	GO:0044763	single-organism cellular process	Biological Process	12	E2R7A3, Q0QEN2, J9NVE9, F1PDY8, E2R357, F1PB77, E2RLF1, F1PJ74, E2R5H4, F1P6H7, P00011, C4MW55
3	GO:1902578	single-organism localization	Biological Process	8	F1PYZ1, P60529, J9JHF7, Q0QEN2, F1P8V6, F1PJ74, P60524, C4MW55
3	GO:0009056	catabolic process	Biological Process	4	E2QW34, J9NVE9, F1PJ74, E2R4H4
3	GO:0071704	organic substance metabolic process	Biological Process	19	E2RL75, E2R7A3, F6Y5M8, J9NVE9, F1PJ74, F1P6H7, J9P4B4, C4MW55, E2QW34, J9NS29, Q0QEN2, J9PB81, F1PB77, E2RLF1, E2QXH0, E2R5H4, F1PIF2, E2R4H4, P00011
3	GO:0044703	multi-organism reproductive process	Biological Process	1	E2R357
3	GO:0006807	nitrogen compound metabolic process	Biological Process	7	E2RL75, F6Y5M8, J9NVE9, Q0QEN2, E2RLF1, P00011, C4MW55
3	GO:0019953	sexual reproduction	Biological Process	1	E2R357
4	GO:0048731	system development	Biological Process	3	E2RLF1, F1PJ74, E2R5H4
4	GO:0016032	viral process	Biological Process	1	F1PGC3
4	GO:0043207	response to external biotic stimulus	Biological Process	2	J9PB81, F1PGC3
4	GO:0019538	protein metabolic process	Biological Process	10	E2R7A3, E2QW34, F6Y5M8, J9NVE9, J9PB81, F1PJ74, E2R5H4, J9P4B4, F1PIF2, E2R4H4
4	GO:0045834	positive regulation of lipid metabolic process	Biological Process	1	J9NVE9
4	GO:0044262	cellular carbohydrate metabolic process	Biological Process	1	F1PB77
4	GO:0006091	generation of precursor metabolites and energy	Biological Process	3	F1PB77, P00011, C4MW55
4	GO:0055114	oxidation-reduction process	Biological Process	3	F1PB77, P00011, C4MW55
4	GO:0048869	cellular developmental process	Biological Process	1	F1PJ74
4	GO:0030030	cell projection organization	Biological Process	1	F1PJ74
4	GO:0050808	synapse organization	Biological Process	1	F1PJ74
4	GO:0009967	positive regulation of signal transduction	Biological Process	1	J9NVE9
4	GO:1901360	organic cyclic compound metabolic process	Biological Process	6	E2RL75, J9NVE9, Q0QEN2, F1PJ74, P00011, C4MW55
4	GO:0044712	single-organism catabolic process	Biological Process	1	J9NVE9
4	GO:0051130	positive regulation of cellular component organization	Biological Process	1	F1PJ74
4	GO:0034641	cellular nitrogen compound metabolic process	Biological Process	6	E2RL75, F6Y5M8, J9NVE9, Q0QEN2, P00011, C4MW55
4	GO:0044255	cellular lipid metabolic process	Biological Process	2	J9NVE9, E2RLF1
4	GO:0070887	cellular response to chemical stimulus	Biological Process	1	F1PGC3
4	GO:0010033	response to organic substance	Biological Process	1	F1PGC3
4	GO:0006996	organelle organization	Biological Process	2	E2R357, J9P992
4	GO:1901575	organic substance catabolic process	Biological Process	4	E2QW34, J9NVE9, F1PJ74, E2R4H4
4	GO:0006959	humoral immune response	Biological Process	1	J9P4B4
4	GO:0031324	negative regulation of cellular metabolic process	Biological Process	2	J9NVE9, J9NS29
4	GO:0044765	single-organism transport	Biological Process	8	F1PYZ1, P60529, J9JHF7, Q0QEN2, F1P8V6, F1PJ74, P60524, C4MW55
4	GO:0006450	regulation of translational fidelity	Biological Process	1	F6Y5M8
4	GO:0006139	nucleobase-containing compound metabolic process	Biological Process	5	E2RL75, J9NVE9, Q0QEN2, P00011, C4MW55
4	GO:0007165	signal transduction	Biological Process	2	E2R7A3, J9NVE9
4	GO:0009896	positive regulation of catabolic process	Biological Process	1	J9NVE9
4	GO:0030850	prostate gland development	Biological Process	1	E2RLF1
4	GO:0044281	small molecule metabolic process	Biological Process	4	Q0QEN2, F1PJ74, P00011, C4MW55
4	GO:0051129	negative regulation of cellular component organization	Biological Process	1	F1PJ74
4	GO:0009966	regulation of signal transduction	Biological Process	1	J9NVE9
4	GO:1901564	organonitrogen compound metabolic process	Biological Process	5	F6Y5M8, Q0QEN2, E2RLF1, P00011, C4MW55
4	GO:0010604	positive regulation of macromolecule metabolic process	Biological Process	1	J9NVE9
4	GO:0051128	regulation of cellular component organization	Biological Process	1	F1PJ74
4	GO:0071827	plasma lipoprotein particle organization	Biological Process	1	F1PJ74
4	GO:1901615	organic hydroxy compound metabolic process	Biological Process	1	F1PJ74
4	GO:0044260	cellular macromolecule metabolic process	Biological Process	8	E2RL75, E2QW34, F6Y5M8, J9NVE9, F1PB77, F1PJ74, E2R5H4, E2R4H4
4	GO:0045595	regulation of cell differentiation	Biological Process	1	F1PJ74
4	GO:0044711	single-organism biosynthetic process	Biological Process	2	Q0QEN2, F1PJ74
4	GO:0010605	negative regulation of macromolecule metabolic process	Biological Process	2	J9NVE9, J9NS29
4	GO:0006793	phosphorus metabolic process	Biological Process	5	J9NVE9, Q0QEN2, E2R5H4, P00011, C4MW55
4	GO:0009889	regulation of biosynthetic process	Biological Process	3	F6Y5M8, J9NVE9, F1PJ74
4	GO:0048513	animal organ development	Biological Process	1	E2RLF1
4	GO:0044403	symbiosis, encompassing mutualism through parasitism	Biological Process	1	F1PGC3
4	GO:0006725	cellular aromatic compound metabolic process	Biological Process	5	E2RL75, J9NVE9, Q0QEN2, P00011, C4MW55
4	GO:0019637	organophosphate metabolic process	Biological Process	3	Q0QEN2, P00011, C4MW55
4	GO:0034369	plasma lipoprotein particle remodeling	Biological Process	1	F1PJ74
4	GO:1901576	organic substance biosynthetic process	Biological Process	4	F6Y5M8, J9NVE9, Q0QEN2, F1PJ74
4	GO:0010646	regulation of cell communication	Biological Process	1	J9NVE9
4	GO:0051640	organelle localization	Biological Process	1	J9NU17
4	GO:0048468	cell development	Biological Process	1	F1PJ74
4	GO:0010876	lipid localization	Biological Process	1	F1PJ74
4	GO:0006810	transport	Biological Process	8	F1PYZ1, P60529, J9JHF7, Q0QEN2, F1P8V6, F1PJ74, C4MW55, P60524
4	GO:0043933	macromolecular complex subunit organization	Biological Process	1	F1PJ74
4	GO:0006952	defense response	Biological Process	1	J9NVE9
4	GO:0010941	regulation of cell death	Biological Process	1	F1PJ74
4	GO:0050803	regulation of synapse structure or activity	Biological Process	1	F1PJ74
4	GO:0006629	lipid metabolic process	Biological Process	4	J9NVE9, E2RLF1, F1PJ74, E2QXH0
4	GO:0009615	response to virus	Biological Process	1	F1PGC3
4	GO:0080090	regulation of primary metabolic process	Biological Process	4	F6Y5M8, J9NVE9, E2RLF1, F1PJ74
4	GO:0051172	negative regulation of nitrogen compound metabolic process	Biological Process	1	J9NVE9
4	GO:0050778	positive regulation of immune response	Biological Process	1	J9P4B4
4	GO:0050790	regulation of catalytic activity	Biological Process	1	F1PJ74
4	GO:0022900	electron transport chain	Biological Process	2	P00011, C4MW55
4	GO:0051049	regulation of transport	Biological Process	1	F1PJ74
4	GO:0048608	reproductive structure development	Biological Process	1	E2RLF1
4	GO:0051171	regulation of nitrogen compound metabolic process	Biological Process	2	F6Y5M8, J9NVE9
4	GO:0031323	regulation of cellular metabolic process	Biological Process	4	F6Y5M8, J9NVE9, J9NS29, F1PJ74
4	GO:0046483	heterocycle metabolic process	Biological Process	5	E2RL75, J9NVE9, Q0QEN2, P00011, C4MW55
4	GO:0007154	cell communication	Biological Process	2	E2R7A3, J9NVE9
4	GO:0042592	homeostatic process	Biological Process	1	F1PJ74
4	GO:0060255	regulation of macromolecule metabolic process	Biological Process	5	F6Y5M8, J9NVE9, J9NS29, F1PJ74, F1P6H7
4	GO:0006956	complement activation	Biological Process	1	J9P4B4
4	GO:0015980	energy derivation by oxidation of organic compounds	Biological Process	3	F1PB77, P00011, C4MW55
4	GO:0044249	cellular biosynthetic process	Biological Process	3	F6Y5M8, J9NVE9, Q0QEN2
4	GO:0008219	cell death	Biological Process	1	F1PJ74
4	GO:0050877	neurological system process	Biological Process	1	J9NU17
4	GO:0050776	regulation of immune response	Biological Process	1	J9P4B4
4	GO:0009890	negative regulation of biosynthetic process	Biological Process	1	J9NVE9
4	GO:0007276	gamete generation	Biological Process	1	E2R357
4	GO:0048732	gland development	Biological Process	1	E2RLF1
4	GO:0031325	positive regulation of cellular metabolic process	Biological Process	2	J9NVE9, F1PJ74
4	GO:0007275	multicellular organism development	Biological Process	3	E2RLF1, E2R5H4, F1PJ74
4	GO:2000026	regulation of multicellular organismal development	Biological Process	1	F1PJ74
4	GO:1901135	carbohydrate derivative metabolic process	Biological Process	3	Q0QEN2, P00011, C4MW55
4	GO:0010647	positive regulation of cell communication	Biological Process	1	J9NVE9
4	GO:0009894	regulation of catabolic process	Biological Process	1	J9NVE9
4	GO:1901657	glycosyl compound metabolic process	Biological Process	3	Q0QEN2, P00011, C4MW55
4	GO:0055086	nucleobase-containing small molecule metabolic process	Biological Process	3	Q0QEN2, P00011, C4MW55
4	GO:0023014	signal transduction by protein phosphorylation	Biological Process	1	J9NVE9
4	GO:0043170	macromolecule metabolic process	Biological Process	14	E2RL75, E2R7A3, F6Y5M8, J9NVE9, F1PJ74, F1P6H7, J9P4B4, E2QW34, J9NS29, J9PB81, F1PB77, E2R5H4, F1PIF2, E2R4H4
4	GO:0005975	carbohydrate metabolic process	Biological Process	1	F1PB77
4	GO:0044248	cellular catabolic process	Biological Process	3	E2QW34, J9NVE9, E2R4H4
4	GO:0044723	single-organism carbohydrate metabolic process	Biological Process	1	F1PB77
5	GO:0001655	urogenital system development	Biological Process	1	E2RLF1
5	GO:0007600	sensory perception	Biological Process	1	J9NU17
5	GO:0010562	positive regulation of phosphorus metabolic process	Biological Process	1	J9NVE9
5	GO:0043412	macromolecule modification	Biological Process	2	J9NVE9, E2R5H4
5	GO:0031327	negative regulation of cellular biosynthetic process	Biological Process	1	J9NVE9
5	GO:1902531	regulation of intracellular signal transduction	Biological Process	1	J9NVE9
5	GO:0050807	regulation of synapse organization	Biological Process	1	F1PJ74
5	GO:0044271	cellular nitrogen compound biosynthetic process	Biological Process	3	F6Y5M8, J9NVE9, Q0QEN2
5	GO:1901362	organic cyclic compound biosynthetic process	Biological Process	2	J9NVE9, Q0QEN2
5	GO:0006643	membrane lipid metabolic process	Biological Process	1	E2RLF1
5	GO:0044267	cellular protein metabolic process	Biological Process	6	E2QW34, F6Y5M8, J9NVE9, F1PJ74, E2R5H4, E2R4H4
5	GO:0051253	negative regulation of RNA metabolic process	Biological Process	1	J9NVE9
5	GO:0051648	vesicle localization	Biological Process	1	J9NU17
5	GO:0008610	lipid biosynthetic process	Biological Process	1	F1PJ74
5	GO:1901137	carbohydrate derivative biosynthetic process	Biological Process	1	Q0QEN2
5	GO:0042157	lipoprotein metabolic process	Biological Process	1	F1PJ74
5	GO:0010467	gene expression	Biological Process	3	E2RL75, F6Y5M8, J9NVE9
5	GO:0006954	inflammatory response	Biological Process	1	J9NVE9
5	GO:1901293	nucleoside phosphate biosynthetic process	Biological Process	1	Q0QEN2
5	GO:0061458	reproductive system development	Biological Process	1	E2RLF1
5	GO:0006119	oxidative phosphorylation	Biological Process	2	P00011, C4MW55
5	GO:1901566	organonitrogen compound biosynthetic process	Biological Process	2	F6Y5M8, Q0QEN2
5	GO:0044265	cellular macromolecule catabolic process	Biological Process	2	E2QW34, E2R4H4
5	GO:0034654	nucleobase-containing compound biosynthetic process	Biological Process	2	J9NVE9, Q0QEN2
5	GO:0034248	regulation of cellular amide metabolic process	Biological Process	1	F6Y5M8
5	GO:0051246	regulation of protein metabolic process	Biological Process	3	F6Y5M8, J9NVE9, F1PJ74
5	GO:0010629	negative regulation of gene expression	Biological Process	1	J9NVE9
5	GO:1901214	regulation of neuron death	Biological Process	1	F1PJ74
5	GO:0051174	regulation of phosphorus metabolic process	Biological Process	1	J9NVE9
5	GO:0071702	organic substance transport	Biological Process	1	F1PJ74
5	GO:0005977	glycogen metabolic process	Biological Process	1	F1PB77
5	GO:0035556	intracellular signal transduction	Biological Process	1	J9NVE9
5	GO:0051247	positive regulation of protein metabolic process	Biological Process	1	J9NVE9
5	GO:0036211	protein modification process	Biological Process	2	J9NVE9, E2R5H4
5	GO:0018130	heterocycle biosynthetic process	Biological Process	2	J9NVE9, Q0QEN2
5	GO:0090407	organophosphate biosynthetic process	Biological Process	1	Q0QEN2
5	GO:1902533	positive regulation of intracellular signal transduction	Biological Process	1	J9NVE9
5	GO:0060284	regulation of cell development	Biological Process	1	F1PJ74
5	GO:0045934	negative regulation of nucleobase-containing compound metabolic process	Biological Process	1	J9NVE9
5	GO:0070997	neuron death	Biological Process	1	F1PJ74
5	GO:0032268	regulation of cellular protein metabolic process	Biological Process	3	F6Y5M8, J9NVE9, F1PJ74
5	GO:0050996	positive regulation of lipid catabolic process	Biological Process	1	J9NVE9
5	GO:0051960	regulation of nervous system development	Biological Process	1	F1PJ74
5	GO:0050994	regulation of lipid catabolic process	Biological Process	1	J9NVE9
5	GO:0034367	macromolecular complex remodeling	Biological Process	1	F1PJ74
5	GO:0005976	polysaccharide metabolic process	Biological Process	1	F1PB77
5	GO:0010558	negative regulation of macromolecule biosynthetic process	Biological Process	1	J9NVE9
5	GO:0016070	RNA metabolic process	Biological Process	2	E2RL75, J9NVE9
5	GO:0048666	neuron development	Biological Process	1	F1PJ74
5	GO:0034645	cellular macromolecule biosynthetic process	Biological Process	2	F6Y5M8, J9NVE9
5	GO:0006665	sphingolipid metabolic process	Biological Process	1	E2RLF1
5	GO:0022904	respiratory electron transport chain	Biological Process	2	P00011, C4MW55
5	GO:0090304	nucleic acid metabolic process	Biological Process	2	E2RL75, J9NVE9
5	GO:0044264	cellular polysaccharide metabolic process	Biological Process	1	F1PB77
5	GO:0031326	regulation of cellular biosynthetic process	Biological Process	2	F6Y5M8, J9NVE9
5	GO:0006112	energy reserve metabolic process	Biological Process	1	F1PB77
5	GO:0009059	macromolecule biosynthetic process	Biological Process	2	F6Y5M8, J9NVE9
5	GO:0000165	MAPK cascade	Biological Process	1	J9NVE9
5	GO:0009116	nucleoside metabolic process	Biological Process	3	Q0QEN2, P00011, C4MW55
5	GO:0019219	regulation of nucleobase-containing compound metabolic process	Biological Process	1	J9NVE9
5	GO:0006818	hydrogen transport	Biological Process	2	Q0QEN2, C4MW55
5	GO:0015850	organic hydroxy compound transport	Biological Process	1	F1PJ74
5	GO:0045333	cellular respiration	Biological Process	2	P00011, C4MW55
5	GO:0006811	ion transport	Biological Process	2	Q0QEN2, C4MW55
5	GO:0034097	response to cytokine	Biological Process	1	F1PGC3
5	GO:0051252	regulation of RNA metabolic process	Biological Process	1	J9NVE9
5	GO:0006796	phosphate-containing compound metabolic process	Biological Process	5	J9NVE9, Q0QEN2, E2R5H4, P00011, C4MW55
5	GO:0030154	cell differentiation	Biological Process	1	F1PJ74
5	GO:0006518	peptide metabolic process	Biological Process	1	F6Y5M8
5	GO:0006508	proteolysis	Biological Process	5	E2QW34, E2R7A3, J9PB81, F1PIF2, E2R4H4
5	GO:0031175	neuron projection development	Biological Process	1	F1PJ74
5	GO:0030163	protein catabolic process	Biological Process	2	E2QW34, E2R4H4
5	GO:0007399	nervous system development	Biological Process	1	F1PJ74
5	GO:0071825	protein-lipid complex subunit organization	Biological Process	1	F1PJ74
5	GO:0010556	regulation of macromolecule biosynthetic process	Biological Process	2	F6Y5M8, J9NVE9
5	GO:0031344	regulation of cell projection organization	Biological Process	1	F1PJ74
5	GO:0006066	alcohol metabolic process	Biological Process	1	F1PJ74
5	GO:0032270	positive regulation of cellular protein metabolic process	Biological Process	1	J9NVE9
5	GO:0048878	chemical homeostasis	Biological Process	1	F1PJ74
5	GO:0009057	macromolecule catabolic process	Biological Process	2	E2QW34, E2R4H4
5	GO:0006869	lipid transport	Biological Process	1	F1PJ74
5	GO:0072521	purine-containing compound metabolic process	Biological Process	3	Q0QEN2, P00011, C4MW55
5	GO:0044242	cellular lipid catabolic process	Biological Process	1	J9NVE9
5	GO:0010468	regulation of gene expression	Biological Process	2	F6Y5M8, J9NVE9
5	GO:0046890	regulation of lipid biosynthetic process	Biological Process	1	F1PJ74
5	GO:0016125	sterol metabolic process	Biological Process	1	F1PJ74
5	GO:0071310	cellular response to organic substance	Biological Process	1	F1PGC3
5	GO:0015669	gas transport	Biological Process	5	F1PYZ1, P60529, J9JHF7, F1P8V6, P60524
5	GO:0019216	regulation of lipid metabolic process	Biological Process	2	J9NVE9, F1PJ74
5	GO:0019693	ribose phosphate metabolic process	Biological Process	3	Q0QEN2, P00011, C4MW55
5	GO:0048232	male gamete generation	Biological Process	1	E2R357
5	GO:1901659	glycosyl compound biosynthetic process	Biological Process	1	Q0QEN2
5	GO:0032368	regulation of lipid transport	Biological Process	1	F1PJ74
5	GO:0019438	aromatic compound biosynthetic process	Biological Process	2	J9NVE9, Q0QEN2
5	GO:0008202	steroid metabolic process	Biological Process	1	F1PJ74
5	GO:0055085	transmembrane transport	Biological Process	1	Q0QEN2
5	GO:0016042	lipid catabolic process	Biological Process	1	J9NVE9
5	GO:0043603	cellular amide metabolic process	Biological Process	1	F6Y5M8
5	GO:0006753	nucleoside phosphate metabolic process	Biological Process	3	Q0QEN2, P00011, C4MW55
6	GO:0042773	ATP synthesis coupled electron transport	Biological Process	2	P00011, C4MW55
6	GO:0030182	neuron differentiation	Biological Process	1	F1PJ74
6	GO:0009117	nucleotide metabolic process	Biological Process	3	Q0QEN2, P00011, C4MW55
6	GO:0010739	positive regulation of protein kinase A signaling	Biological Process	1	J9NVE9
6	GO:0010608	posttranscriptional regulation of gene expression	Biological Process	1	F6Y5M8
6	GO:0015992	proton transport	Biological Process	2	Q0QEN2, C4MW55
6	GO:0043043	peptide biosynthetic process	Biological Process	1	F6Y5M8
6	GO:0055088	lipid homeostasis	Biological Process	1	F1PJ74
6	GO:0006355	regulation of transcription, DNA-templated	Biological Process	1	J9NVE9
6	GO:0006073	cellular glucan metabolic process	Biological Process	1	F1PB77
6	GO:0009123	nucleoside monophosphate metabolic process	Biological Process	3	Q0QEN2, P00011, C4MW55
6	GO:0006412	translation	Biological Process	1	F6Y5M8
6	GO:0043408	regulation of MAPK cascade	Biological Process	1	J9NVE9
6	GO:0006163	purine nucleotide metabolic process	Biological Process	3	Q0QEN2, P00011, C4MW55
6	GO:0009141	nucleoside triphosphate metabolic process	Biological Process	3	Q0QEN2, P00011, C4MW55
6	GO:0031401	positive regulation of protein modification process	Biological Process	1	J9NVE9
6	GO:0072522	purine-containing compound biosynthetic process	Biological Process	1	Q0QEN2
6	GO:1902679	negative regulation of RNA biosynthetic process	Biological Process	1	J9NVE9
6	GO:0046390	ribose phosphate biosynthetic process	Biological Process	1	Q0QEN2
6	GO:0010738	regulation of protein kinase A signaling	Biological Process	1	J9NVE9
6	GO:0034220	ion transmembrane transport	Biological Process	1	Q0QEN2
6	GO:0034368	protein-lipid complex remodeling	Biological Process	1	F1PJ74
6	GO:0022008	neurogenesis	Biological Process	1	F1PJ74
6	GO:0045892	negative regulation of transcription, DNA-templated	Biological Process	1	J9NVE9
6	GO:0042278	purine nucleoside metabolic process	Biological Process	3	Q0QEN2, P00011, C4MW55
6	GO:0044042	glucan metabolic process	Biological Process	1	F1PB77
6	GO:0010737	protein kinase A signaling	Biological Process	1	J9NVE9
6	GO:0044257	cellular protein catabolic process	Biological Process	2	E2QW34, E2R4H4
6	GO:0006464	cellular protein modification process	Biological Process	2	J9NVE9, E2R5H4
6	GO:0019220	regulation of phosphate metabolic process	Biological Process	1	J9NVE9
6	GO:0006417	regulation of translation	Biological Process	1	F6Y5M8
6	GO:1902652	secondary alcohol metabolic process	Biological Process	1	F1PJ74
6	GO:0043410	positive regulation of MAPK cascade	Biological Process	1	J9NVE9
6	GO:0008203	cholesterol metabolic process	Biological Process	1	F1PJ74
6	GO:0009119	ribonucleoside metabolic process	Biological Process	3	Q0QEN2, P00011, C4MW55
6	GO:0071345	cellular response to cytokine stimulus	Biological Process	1	F1PGC3
6	GO:0043604	amide biosynthetic process	Biological Process	1	F6Y5M8
6	GO:0007283	spermatogenesis	Biological Process	1	E2R357
6	GO:0006351	transcription, DNA-templated	Biological Process	1	J9NVE9
6	GO:0051603	proteolysis involved in cellular protein catabolic process	Biological Process	2	E2QW34, E2R4H4
6	GO:0032371	regulation of sterol transport	Biological Process	1	F1PJ74
6	GO:0050954	sensory perception of mechanical stimulus	Biological Process	1	J9NU17
6	GO:0070371	ERK1 and ERK2 cascade	Biological Process	1	J9NVE9
6	GO:0009259	ribonucleotide metabolic process	Biological Process	3	Q0QEN2, P00011, C4MW55
6	GO:0034660	ncRNA metabolic process	Biological Process	1	E2RL75
6	GO:0035455	response to interferon-alpha	Biological Process	1	F1PGC3
6	GO:0050767	regulation of neurogenesis	Biological Process	1	F1PJ74
6	GO:0009124	nucleoside monophosphate biosynthetic process	Biological Process	1	Q0QEN2
6	GO:0009163	nucleoside biosynthetic process	Biological Process	1	Q0QEN2
6	GO:2001141	regulation of RNA biosynthetic process	Biological Process	1	J9NVE9
6	GO:0016310	phosphorylation	Biological Process	4	J9NVE9, E2R5H4, P00011, C4MW55
6	GO:2000113	negative regulation of cellular macromolecule biosynthetic process	Biological Process	1	J9NVE9
6	GO:0006123	mitochondrial electron transport, cytochrome c to oxygen	Biological Process	1	C4MW55
6	GO:0002526	acute inflammatory response	Biological Process	1	J9NVE9
6	GO:0032774	RNA biosynthetic process	Biological Process	1	J9NVE9
6	GO:0045937	positive regulation of phosphate metabolic process	Biological Process	1	J9NVE9
6	GO:0006812	cation transport	Biological Process	2	Q0QEN2, C4MW55
6	GO:0015918	sterol transport	Biological Process	1	F1PJ74
6	GO:0015671	oxygen transport	Biological Process	5	F1PYZ1, P60529, J9JHF7, F1P8V6, P60524
6	GO:0009142	nucleoside triphosphate biosynthetic process	Biological Process	1	Q0QEN2
6	GO:0090662	ATP hydrolysis coupled transmembrane transport	Biological Process	1	Q0QEN2
6	GO:2000112	regulation of cellular macromolecule biosynthetic process	Biological Process	2	F6Y5M8, J9NVE9
6	GO:0006396	RNA processing	Biological Process	1	E2RL75
6	GO:0006414	translational elongation	Biological Process	1	F6Y5M8
6	GO:0009165	nucleotide biosynthetic process	Biological Process	1	Q0QEN2
6	GO:0010975	regulation of neuron projection development	Biological Process	1	F1PJ74
6	GO:0031399	regulation of protein modification process	Biological Process	1	J9NVE9
7	GO:0045664	regulation of neuron differentiation	Biological Process	1	F1PJ74
7	GO:0042451	purine nucleoside biosynthetic process	Biological Process	1	Q0QEN2
7	GO:0001934	positive regulation of protein phosphorylation	Biological Process	1	J9NVE9
7	GO:0009199	ribonucleoside triphosphate metabolic process	Biological Process	3	Q0QEN2, P00011, C4MW55
7	GO:0009201	ribonucleoside triphosphate biosynthetic process	Biological Process	1	Q0QEN2
7	GO:0016073	snRNA metabolic process	Biological Process	1	E2RL75
7	GO:0018193	peptidyl-amino acid modification	Biological Process	1	J9NVE9
7	GO:0046128	purine ribonucleoside metabolic process	Biological Process	3	Q0QEN2, P00011, C4MW55
7	GO:0042327	positive regulation of phosphorylation	Biological Process	1	J9NVE9
7	GO:0009150	purine ribonucleotide metabolic process	Biological Process	3	Q0QEN2, P00011, C4MW55
7	GO:0009260	ribonucleotide biosynthetic process	Biological Process	1	Q0QEN2
7	GO:0030301	cholesterol transport	Biological Process	1	F1PJ74
7	GO:0001932	regulation of protein phosphorylation	Biological Process	1	J9NVE9
7	GO:0098660	inorganic ion transmembrane transport	Biological Process	1	Q0QEN2
7	GO:0006448	regulation of translational elongation	Biological Process	1	F6Y5M8
7	GO:0042455	ribonucleoside biosynthetic process	Biological Process	1	Q0QEN2
7	GO:0009144	purine nucleoside triphosphate metabolic process	Biological Process	3	Q0QEN2, P00011, C4MW55
7	GO:0034470	ncRNA processing	Biological Process	1	E2RL75
7	GO:0009156	ribonucleoside monophosphate biosynthetic process	Biological Process	1	Q0QEN2
7	GO:0097659	nucleic acid-templated transcription	Biological Process	1	J9NVE9
7	GO:0007605	sensory perception of sound	Biological Process	1	J9NU17
7	GO:0006953	acute-phase response	Biological Process	1	J9NVE9
7	GO:0015672	monovalent inorganic cation transport	Biological Process	2	Q0QEN2, C4MW55
7	GO:0070374	positive regulation of ERK1 and ERK2 cascade	Biological Process	1	J9NVE9
7	GO:0015991	ATP hydrolysis coupled proton transport	Biological Process	1	Q0QEN2
7	GO:0070372	regulation of ERK1 and ERK2 cascade	Biological Process	1	J9NVE9
7	GO:0098655	cation transmembrane transport	Biological Process	1	Q0QEN2
7	GO:1902600	hydrogen ion transmembrane transport	Biological Process	1	Q0QEN2
7	GO:0048699	generation of neurons	Biological Process	1	F1PJ74
7	GO:0042775	mitochondrial ATP synthesis coupled electron transport	Biological Process	2	C4MW55, P00011
7	GO:0042325	regulation of phosphorylation	Biological Process	1	J9NVE9
7	GO:1903507	negative regulation of nucleic acid-templated transcription	Biological Process	1	J9NVE9
7	GO:0035457	cellular response to interferon-alpha	Biological Process	1	F1PGC3
7	GO:0009161	ribonucleoside monophosphate metabolic process	Biological Process	3	Q0QEN2, P00011, C4MW55
7	GO:0009127	purine nucleoside monophosphate biosynthetic process	Biological Process	1	Q0QEN2
7	GO:0009126	purine nucleoside monophosphate metabolic process	Biological Process	3	Q0QEN2, P00011, C4MW55
7	GO:0006164	purine nucleotide biosynthetic process	Biological Process	1	Q0QEN2
7	GO:0006468	protein phosphorylation	Biological Process	2	J9NVE9, E2R5H4
7	GO:0009145	purine nucleoside triphosphate biosynthetic process	Biological Process	1	Q0QEN2
7	GO:1903506	regulation of nucleic acid-templated transcription	Biological Process	1	J9NVE9
7	GO:0032374	regulation of cholesterol transport	Biological Process	1	F1PJ74
8	GO:0033138	positive regulation of peptidyl-serine phosphorylation	Biological Process	1	J9NVE9
8	GO:0016180	snRNA processing	Biological Process	1	E2RL75
8	GO:0009167	purine ribonucleoside monophosphate metabolic process	Biological Process	3	Q0QEN2, P00011, C4MW55
8	GO:0009206	purine ribonucleoside triphosphate biosynthetic process	Biological Process	1	Q0QEN2
8	GO:0009205	purine ribonucleoside triphosphate metabolic process	Biological Process	3	Q0QEN2, P00011, C4MW55
8	GO:0015985	energy coupled proton transport, down electrochemical gradient	Biological Process	1	Q0QEN2
8	GO:0033135	regulation of peptidyl-serine phosphorylation	Biological Process	1	J9NVE9
8	GO:0046129	purine ribonucleoside biosynthetic process	Biological Process	1	Q0QEN2
8	GO:0009168	purine ribonucleoside monophosphate biosynthetic process	Biological Process	1	Q0QEN2
8	GO:0018105	peptidyl-serine phosphorylation	Biological Process	1	J9NVE9
8	GO:0098662	inorganic cation transmembrane transport	Biological Process	1	Q0QEN2
8	GO:0018209	peptidyl-serine modification	Biological Process	1	J9NVE9
8	GO:0015988	energy coupled proton transmembrane transport, against electrochemical gradient	Biological Process	1	Q0QEN2
8	GO:0046034	ATP metabolic process	Biological Process	3	Q0QEN2, P00011, C4MW55
8	GO:0009152	purine ribonucleotide biosynthetic process	Biological Process	1	Q0QEN2
9	GO:0015986	ATP synthesis coupled proton transport	Biological Process	1	Q0QEN2
9	GO:0006754	ATP biosynthetic process	Biological Process	1	Q0QEN2

## Sheet: mf
Level	GO ID	Term	GO Type	#Seqs	Sequence Names
1	GO:0003674	molecular_function	Molecular Function	36	F1PYZ1, E2RL75, E2QYB2, J9P9B9, J9PBN6, F1PJ74, F1P6H7, J9P4B4, C4MW55, J9NYN2, E2QUU8, J9JHF7, J9NU17, J9P8M2, J9PB81, F1PIF2, F1Q0N9, E2R7A3, P60529, L7N0L9, F6Y5M8, F1P8A6, J9P5Z0, E2QW34, Q0QEN2, J9NS29, F1PB77, E2R997, E2R5H4, E2QXH0, F1P8V6, F1PGC3, P00011, J9P992, P60524, E2R4H4
2	GO:0009055	electron carrier activity	Molecular Function	2	C4MW55, P00011
2	GO:0005198	structural molecule activity	Molecular Function	1	F1Q0N9
2	GO:0005488	binding	Molecular Function	24	F1PYZ1, E2QYB2, J9P9B9, E2RL75, P60529, E2R7A3, F1P8A6, F1PJ74, F1P6H7, J9P4B4, C4MW55, J9NYN2, E2QUU8, J9JHF7, J9NU17, J9P8M2, Q0QEN2, F1PB77, F1P8V6, E2R5H4, F1PGC3, P60524, P00011, J9P992
2	GO:0003824	catalytic activity	Molecular Function	16	E2R7A3, L7N0L9, F6Y5M8, J9P5Z0, C4MW55, E2QW34, J9NU17, Q0QEN2, J9PB81, F1PB77, E2R997, E2R5H4, E2QXH0, F1PIF2, J9P992, E2R4H4
2	GO:0098772	molecular function regulator	Molecular Function	2	J9NS29, J9PBN6
2	GO:0005215	transporter activity	Molecular Function	2	Q0QEN2, C4MW55
2	GO:0060089	molecular transducer activity	Molecular Function	1	E2R7A3
3	GO:0097159	organic cyclic compound binding	Molecular Function	12	F1PYZ1, P60529, J9JHF7, J9NU17, Q0QEN2, F1PB77, F1P8V6, E2R5H4, F1PGC3, P60524, P00011, J9P992
3	GO:0016491	oxidoreductase activity	Molecular Function	1	C4MW55
3	GO:0016740	transferase activity	Molecular Function	3	L7N0L9, F1PB77, E2R5H4
3	GO:0030234	enzyme regulator activity	Molecular Function	2	J9NS29, J9PBN6
3	GO:0043167	ion binding	Molecular Function	7	J9NYN2, F1PYZ1, P60529, J9JHF7, F1PB77, C4MW55, P60524
3	GO:0022857	transmembrane transporter activity	Molecular Function	2	Q0QEN2, C4MW55
3	GO:0016787	hydrolase activity	Molecular Function	11	E2R7A3, E2QW34, J9NU17, F6Y5M8, J9P5Z0, Q0QEN2, J9PB81, E2QXH0, F1PIF2, J9P992, E2R4H4
3	GO:0019825	oxygen binding	Molecular Function	5	F1PYZ1, P60529, J9JHF7, F1P8V6, P60524
3	GO:0004872	receptor activity	Molecular Function	1	E2R7A3
3	GO:0048037	cofactor binding	Molecular Function	1	F1PB77
3	GO:0008289	lipid binding	Molecular Function	1	F1PJ74
3	GO:0036094	small molecule binding	Molecular Function	5	J9NU17, Q0QEN2, F1PB77, E2R5H4, J9P992
3	GO:0044877	macromolecular complex binding	Molecular Function	1	J9P992
3	GO:0097367	carbohydrate derivative binding	Molecular Function	4	J9NU17, Q0QEN2, E2R5H4, J9P992
3	GO:0005515	protein binding	Molecular Function	13	E2QYB2, J9P9B9, E2R7A3, F1P8A6, F1PJ74, F1P6H7, J9P4B4, E2QUU8, J9NU17, J9P8M2, E2R5H4, F1PGC3, J9P992
3	GO:1901363	heterocyclic compound binding	Molecular Function	12	F1PYZ1, P60529, J9JHF7, J9NU17, Q0QEN2, F1PB77, F1P8V6, E2R5H4, F1PGC3, P60524, P00011, J9P992
3	GO:0004129	cytochrome-c oxidase activity	Molecular Function	1	C4MW55
3	GO:0022892	substrate-specific transporter activity	Molecular Function	2	Q0QEN2, C4MW55
4	GO:0022804	active transmembrane transporter activity	Molecular Function	1	Q0QEN2
4	GO:0003676	nucleic acid binding	Molecular Function	1	F1PGC3
4	GO:0061134	peptidase regulator activity	Molecular Function	2	J9NS29, J9PBN6
4	GO:0015002	heme-copper terminal oxidase activity	Molecular Function	1	C4MW55
4	GO:0032553	ribonucleotide binding	Molecular Function	4	J9NU17, Q0QEN2, E2R5H4, J9P992
4	GO:0022891	substrate-specific transmembrane transporter activity	Molecular Function	2	Q0QEN2, C4MW55
4	GO:0046906	tetrapyrrole binding	Molecular Function	6	F1PYZ1, P60529, J9JHF7, F1P8V6, P60524, P00011
4	GO:0001882	nucleoside binding	Molecular Function	4	J9NU17, Q0QEN2, E2R5H4, J9P992
4	GO:0016817	hydrolase activity, acting on acid anhydrides	Molecular Function	4	J9NU17, J9P5Z0, Q0QEN2, J9P992
4	GO:0016772	transferase activity, transferring phosphorus-containing groups	Molecular Function	2	L7N0L9, E2R5H4
4	GO:0030170	pyridoxal phosphate binding	Molecular Function	1	F1PB77
4	GO:0016788	hydrolase activity, acting on ester bonds	Molecular Function	2	F6Y5M8, E2QXH0
4	GO:0043168	anion binding	Molecular Function	1	F1PB77
4	GO:0017171	serine hydrolase activity	Molecular Function	2	E2R7A3, J9PB81
4	GO:1901265	nucleoside phosphate binding	Molecular Function	4	J9NU17, Q0QEN2, E2R5H4, J9P992
4	GO:0016757	transferase activity, transferring glycosyl groups	Molecular Function	1	F1PB77
4	GO:0032403	protein complex binding	Molecular Function	1	J9P992
4	GO:0038024	cargo receptor activity	Molecular Function	1	E2R7A3
4	GO:0008092	cytoskeletal protein binding	Molecular Function	1	J9P992
4	GO:0043169	cation binding	Molecular Function	6	J9NYN2, F1PYZ1, P60529, J9JHF7, C4MW55, P60524
4	GO:0000166	nucleotide binding	Molecular Function	4	J9NU17, Q0QEN2, E2R5H4, J9P992
4	GO:0016675	oxidoreductase activity, acting on a heme group of donors	Molecular Function	1	C4MW55
4	GO:0004857	enzyme inhibitor activity	Molecular Function	2	J9NS29, J9PBN6
4	GO:0008233	peptidase activity	Molecular Function	5	E2R7A3, E2QW34, J9PB81, F1PIF2, E2R4H4
5	GO:0022853	active ion transmembrane transporter activity	Molecular Function	1	Q0QEN2
5	GO:0005044	scavenger receptor activity	Molecular Function	1	E2R7A3
5	GO:0017076	purine nucleotide binding	Molecular Function	4	J9NU17, Q0QEN2, E2R5H4, J9P992
5	GO:0051015	actin filament binding	Molecular Function	1	J9P992
5	GO:0035639	purine ribonucleoside triphosphate binding	Molecular Function	4	J9NU17, Q0QEN2, E2R5H4, J9P992
5	GO:0016758	transferase activity, transferring hexosyl groups	Molecular Function	1	F1PB77
5	GO:0030414	peptidase inhibitor activity	Molecular Function	2	J9NS29, J9PBN6
5	GO:0070011	peptidase activity, acting on L-amino acid peptides	Molecular Function	5	E2R7A3, E2QW34, J9PB81, F1PIF2, E2R4H4
5	GO:0001883	purine nucleoside binding	Molecular Function	4	J9NU17, Q0QEN2, E2R5H4, J9P992
5	GO:0032549	ribonucleoside binding	Molecular Function	4	J9NU17, Q0QEN2, E2R5H4, J9P992
5	GO:0052689	carboxylic ester hydrolase activity	Molecular Function	2	F6Y5M8, E2QXH0
5	GO:0016301	kinase activity	Molecular Function	2	L7N0L9, E2R5H4
5	GO:0061135	endopeptidase regulator activity	Molecular Function	2	J9NS29, J9PBN6
5	GO:0020037	heme binding	Molecular Function	6	F1PYZ1, P60529, J9JHF7, F1P8V6, P60524, P00011
5	GO:0015075	ion transmembrane transporter activity	Molecular Function	2	Q0QEN2, C4MW55
5	GO:0016676	oxidoreductase activity, acting on a heme group of donors, oxygen as acceptor	Molecular Function	1	C4MW55
5	GO:0008236	serine-type peptidase activity	Molecular Function	2	E2R7A3, J9PB81
5	GO:0016773	phosphotransferase activity, alcohol group as acceptor	Molecular Function	1	E2R5H4
5	GO:0046872	metal ion binding	Molecular Function	6	J9NYN2, F1PYZ1, P60529, J9JHF7, C4MW55, P60524
5	GO:0016818	hydrolase activity, acting on acid anhydrides, in phosphorus-containing anhydrides	Molecular Function	4	J9NU17, Q0QEN2, J9P5Z0, J9P992
5	GO:0003779	actin binding	Molecular Function	1	J9P992
5	GO:0015399	primary active transmembrane transporter activity	Molecular Function	1	Q0QEN2
5	GO:0032555	purine ribonucleotide binding	Molecular Function	4	J9NU17, Q0QEN2, E2R5H4, J9P992
5	GO:0016820	hydrolase activity, acting on acid anhydrides, catalyzing transmembrane movement of substances	Molecular Function	1	Q0QEN2
5	GO:0003723	RNA binding	Molecular Function	1	F1PGC3
6	GO:0008324	cation transmembrane transporter activity	Molecular Function	2	Q0QEN2, C4MW55
6	GO:0042626	ATPase activity, coupled to transmembrane movement of substances	Molecular Function	1	Q0QEN2
6	GO:0030554	adenyl nucleotide binding	Molecular Function	4	J9NU17, Q0QEN2, E2R5H4, J9P992
6	GO:0004672	protein kinase activity	Molecular Function	1	E2R5H4
6	GO:0008234	cysteine-type peptidase activity	Molecular Function	1	F1PIF2
6	GO:0002161	aminoacyl-tRNA editing activity	Molecular Function	1	F6Y5M8
6	GO:0032550	purine ribonucleoside binding	Molecular Function	4	J9NU17, Q0QEN2, E2R5H4, J9P992
6	GO:0015405	P-P-bond-hydrolysis-driven transmembrane transporter activity	Molecular Function	1	Q0QEN2
6	GO:0004645	phosphorylase activity	Molecular Function	1	F1PB77
6	GO:0016462	pyrophosphatase activity	Molecular Function	4	J9NU17, Q0QEN2, J9P5Z0, J9P992
6	GO:0004175	endopeptidase activity	Molecular Function	4	E2R7A3, E2QW34, J9PB81, E2R4H4
6	GO:0004252	serine-type endopeptidase activity	Molecular Function	2	E2R7A3, J9PB81
6	GO:0070003	threonine-type peptidase activity	Molecular Function	2	E2QW34, E2R4H4
6	GO:0005524	ATP binding	Molecular Function	4	J9NU17, Q0QEN2, E2R5H4, J9P992
6	GO:0042625	ATPase coupled ion transmembrane transporter activity	Molecular Function	1	Q0QEN2
6	GO:0032559	adenyl ribonucleotide binding	Molecular Function	4	J9NU17, Q0QEN2, E2R5H4, J9P992
6	GO:0004866	endopeptidase inhibitor activity	Molecular Function	2	J9NS29, J9PBN6
6	GO:0046914	transition metal ion binding	Molecular Function	6	J9NYN2, F1PYZ1, P60529, J9JHF7, C4MW55, P60524
7	GO:0017111	nucleoside-triphosphatase activity	Molecular Function	4	J9NU17, Q0QEN2, J9P5Z0, J9P992
7	GO:0022890	inorganic cation transmembrane transporter activity	Molecular Function	2	Q0QEN2, C4MW55
7	GO:0019829	cation-transporting ATPase activity	Molecular Function	1	Q0QEN2
7	GO:0005506	iron ion binding	Molecular Function	4	F1PYZ1, P60529, J9JHF7, P60524
7	GO:0008184	glycogen phosphorylase activity	Molecular Function	1	F1PB77
7	GO:0044769	ATPase activity, coupled to transmembrane movement of ions, rotational mechanism	Molecular Function	1	Q0QEN2
7	GO:0005507	copper ion binding	Molecular Function	1	C4MW55
7	GO:0008270	zinc ion binding	Molecular Function	1	J9NYN2
7	GO:0004298	threonine-type endopeptidase activity	Molecular Function	2	E2QW34, E2R4H4
7	GO:0004869	cysteine-type endopeptidase inhibitor activity	Molecular Function	1	J9NS29
8	GO:0046933	proton-transporting ATP synthase activity, rotational mechanism	Molecular Function	1	Q0QEN2
8	GO:0015077	monovalent inorganic cation transmembrane transporter activity	Molecular Function	2	Q0QEN2, C4MW55
8	GO:0003774	motor activity	Molecular Function	3	J9NU17, J9P5Z0, J9P992
8	GO:0016887	ATPase activity	Molecular Function	1	Q0QEN2
9	GO:0042623	ATPase activity, coupled	Molecular Function	1	Q0QEN2
9	GO:0015078	hydrogen ion transmembrane transporter activity	Molecular Function	2	Q0QEN2, C4MW55
10	GO:0043492	ATPase activity, coupled to movement of substances	Molecular Function	1	Q0QEN2

## Sheet: cc
Level	GO ID	Term	GO Type	#Seqs	Sequence Names
1	GO:0005575	cellular_component	Cellular Component	32	F1PYZ1, E2RL75, J9NVE9, J9PBN6, F1PJ74, F1P6H7, J9P4B4, C4MW55, J9NYN2, J9NU17, J9JHF7, J9P8M2, F1PDY8, J9PB81, E2RLF1, F1PIF2, F1Q0N9, P60529, E2R7A3, F1P8A6, J9P5Z0, E2RKW4, F1PNY4, E2QW34, J9NZW6, Q0QEN2, F1PB77, E2QXH0, E2R4H4, P00011, J9P992, P60524
2	GO:0005623	cell	Cellular Component	20	F1PYZ1, E2RL75, P60529, J9P5Z0, F1PJ74, C4MW55, E2QW34, J9NU17, J9JHF7, F1PDY8, J9PB81, Q0QEN2, F1PB77, E2RLF1, F1PIF2, E2R4H4, F1Q0N9, P00011, J9P992, P60524
2	GO:0044421	extracellular region part	Cellular Component	7	J9P8M2, J9PBN6, E2RLF1, F1PJ74, J9P4B4, F1P6H7, F1PIF2
2	GO:0044422	organelle part	Cellular Component	6	E2RL75, J9NU17, J9P5Z0, Q0QEN2, J9P992, F1Q0N9
2	GO:0043226	organelle	Cellular Component	14	E2RL75, J9P5Z0, F1PJ74, J9P4B4, J9NYN2, J9NU17, J9PB81, Q0QEN2, E2RLF1, E2QXH0, F1PIF2, J9P992, F1Q0N9, P00011
2	GO:0044464	cell part	Cellular Component	20	F1PYZ1, E2RL75, P60529, J9P5Z0, F1PJ74, C4MW55, E2QW34, J9NU17, J9JHF7, J9PB81, Q0QEN2, F1PDY8, F1PB77, E2RLF1, F1PIF2, E2R4H4, F1Q0N9, P00011, J9P992, P60524
2	GO:0044425	membrane part	Cellular Component	4	J9NU17, J9NZW6, Q0QEN2, C4MW55
2	GO:0032991	macromolecular complex	Cellular Component	14	F1PYZ1, E2RL75, P60529, J9P5Z0, F1PJ74, J9P4B4, C4MW55, E2QW34, J9NU17, J9JHF7, Q0QEN2, J9P992, P60524, E2R4H4
2	GO:0031974	membrane-enclosed lumen	Cellular Component	1	E2RL75
2	GO:0016020	membrane	Cellular Component	6	E2R7A3, J9NU17, F1P8A6, J9NZW6, Q0QEN2, C4MW55
2	GO:0005576	extracellular region	Cellular Component	11	J9P8M2, J9NVE9, J9PBN6, E2RKW4, E2RLF1, F1PJ74, E2QXH0, J9P4B4, F1P6H7, F1PIF2, F1PNY4
2	GO:0099080	supramolecular complex	Cellular Component	2	J9NU17, F1Q0N9
3	GO:0098590	plasma membrane region	Cellular Component	1	J9NU17
3	GO:0098796	membrane protein complex	Cellular Component	2	Q0QEN2, C4MW55
3	GO:0043227	membrane-bounded organelle	Cellular Component	10	E2RL75, J9NYN2, J9PB81, Q0QEN2, E2RLF1, E2QXH0, F1PJ74, J9P4B4, F1PIF2, P00011
3	GO:0031012	extracellular matrix	Cellular Component	1	F1P6H7
3	GO:0005622	intracellular	Cellular Component	17	F1PYZ1, E2RL75, P60529, J9P5Z0, C4MW55, E2QW34, J9NU17, J9JHF7, J9PB81, Q0QEN2, E2RLF1, F1PIF2, J9P992, P60524, F1Q0N9, E2R4H4, P00011
3	GO:0034358	plasma lipoprotein particle	Cellular Component	1	F1PJ74
3	GO:0071944	cell periphery	Cellular Component	2	J9NU17, F1Q0N9
3	GO:0043230	extracellular organelle	Cellular Component	1	J9P4B4
3	GO:0042995	cell projection	Cellular Component	1	J9NU17
3	GO:0070469	respiratory chain	Cellular Component	1	C4MW55
3	GO:0098862	cluster of actin-based cell projections	Cellular Component	1	J9NU17
3	GO:0043228	non-membrane-bounded organelle	Cellular Component	4	J9NU17, J9P5Z0, J9P992, F1Q0N9
3	GO:0044424	intracellular part	Cellular Component	17	F1PYZ1, E2RL75, P60529, J9P5Z0, C4MW55, E2QW34, J9NU17, J9JHF7, J9PB81, Q0QEN2, E2RLF1, F1PIF2, J9P992, P60524, F1Q0N9, E2R4H4, P00011
3	GO:0099081	supramolecular polymer	Cellular Component	2	J9NU17, F1Q0N9
3	GO:0043234	protein complex	Cellular Component	13	F1PYZ1, E2RL75, P60529, J9P5Z0, J9P4B4, C4MW55, E2QW34, J9NU17, J9JHF7, Q0QEN2, J9P992, P60524, E2R4H4
3	GO:0070062	extracellular exosome	Cellular Component	1	J9P4B4
3	GO:0043229	intracellular organelle	Cellular Component	10	E2RL75, J9NU17, J9P5Z0, J9PB81, Q0QEN2, E2RLF1, F1PIF2, J9P992, F1Q0N9, P00011
3	GO:0044446	intracellular organelle part	Cellular Component	6	E2RL75, J9NU17, J9P5Z0, Q0QEN2, J9P992, F1Q0N9
3	GO:0031224	intrinsic component of membrane	Cellular Component	2	J9NZW6, C4MW55
3	GO:0005886	plasma membrane	Cellular Component	1	J9NU17
3	GO:1903561	extracellular vesicle	Cellular Component	1	J9P4B4
3	GO:0005615	extracellular space	Cellular Component	2	J9PBN6, F1PJ74
3	GO:0032994	protein-lipid complex	Cellular Component	1	F1PJ74
3	GO:0043233	organelle lumen	Cellular Component	1	E2RL75
3	GO:0044459	plasma membrane part	Cellular Component	1	J9NU17
4	GO:0005903	brush border	Cellular Component	1	J9NU17
4	GO:0044430	cytoskeletal part	Cellular Component	4	J9NU17, J9P5Z0, J9P992, F1Q0N9
4	GO:0005839	proteasome core complex	Cellular Component	2	E2QW34, E2R4H4
4	GO:0070069	cytochrome complex	Cellular Component	1	C4MW55
4	GO:0099512	supramolecular fiber	Cellular Component	2	J9NU17, F1Q0N9
4	GO:0016021	integral component of membrane	Cellular Component	2	J9NZW6, C4MW55
4	GO:0030880	RNA polymerase complex	Cellular Component	1	E2RL75
4	GO:0098858	actin-based cell projection	Cellular Component	1	J9NU17
4	GO:0005938	cell cortex	Cellular Component	1	J9NU17
4	GO:0070013	intracellular organelle lumen	Cellular Component	1	E2RL75
4	GO:0005737	cytoplasm	Cellular Component	11	F1PYZ1, P60529, J9NU17, J9JHF7, Q0QEN2, J9PB81, J9P5Z0, E2RLF1, F1PIF2, P60524, P00011
4	GO:0033178	proton-transporting two-sector ATPase complex, catalytic domain	Cellular Component	1	Q0QEN2
4	GO:0043232	intracellular non-membrane-bounded organelle	Cellular Component	4	J9NU17, J9P5Z0, J9P992, F1Q0N9
4	GO:0016459	myosin complex	Cellular Component	3	J9NU17, J9P5Z0, J9P992
4	GO:0044444	cytoplasmic part	Cellular Component	9	F1PYZ1, P60529, J9NU17, J9JHF7, Q0QEN2, E2RLF1, F1PIF2, P60524, P00011
4	GO:0005833	hemoglobin complex	Cellular Component	4	F1PYZ1, P60529, J9JHF7, P60524
4	GO:0016328	lateral plasma membrane	Cellular Component	1	J9NU17
4	GO:0016469	proton-transporting two-sector ATPase complex	Cellular Component	1	Q0QEN2
4	GO:0031982	vesicle	Cellular Component	2	E2QXH0, J9P4B4
4	GO:0045277	respiratory chain complex IV	Cellular Component	1	C4MW55
4	GO:0043231	intracellular membrane-bounded organelle	Cellular Component	6	E2RL75, Q0QEN2, J9PB81, E2RLF1, F1PIF2, P00011
4	GO:0032039	integrator complex	Cellular Component	1	E2RL75
4	GO:0031941	filamentous actin	Cellular Component	1	J9NU17
4	GO:0045259	proton-transporting ATP synthase complex	Cellular Component	1	Q0QEN2
4	GO:1902494	catalytic complex	Cellular Component	3	E2RL75, E2QW34, E2R4H4
4	GO:1990777	lipoprotein particle	Cellular Component	1	F1PJ74
4	GO:0044429	mitochondrial part	Cellular Component	1	Q0QEN2
4	GO:0044428	nuclear part	Cellular Component	1	E2RL75
4	GO:0000502	proteasome complex	Cellular Component	2	E2QW34, E2R4H4
4	GO:0016323	basolateral plasma membrane	Cellular Component	1	J9NU17
4	GO:0098803	respiratory chain complex	Cellular Component	1	C4MW55
5	GO:0044445	cytosolic part	Cellular Component	4	F1PYZ1, P60529, J9JHF7, P60524
5	GO:1905368	peptidase complex	Cellular Component	2	E2QW34, E2R4H4
5	GO:0031988	membrane-bounded vesicle	Cellular Component	2	E2QXH0, J9P4B4
5	GO:0005773	vacuole	Cellular Component	1	E2RLF1
5	GO:0044448	cell cortex part	Cellular Component	1	J9NU17
5	GO:0005902	microvillus	Cellular Component	1	J9NU17
5	GO:0055029	nuclear DNA-directed RNA polymerase complex	Cellular Component	1	E2RL75
5	GO:0000428	DNA-directed RNA polymerase complex	Cellular Component	1	E2RL75
5	GO:0005829	cytosol	Cellular Component	4	F1PYZ1, P60529, J9JHF7, P60524
5	GO:0005654	nucleoplasm	Cellular Component	1	E2RL75
5	GO:1990234	transferase complex	Cellular Component	1	E2RL75
5	GO:0005739	mitochondrion	Cellular Component	2	Q0QEN2, P00011
5	GO:0099513	polymeric cytoskeletal fiber	Cellular Component	2	J9NU17, F1Q0N9
5	GO:0031981	nuclear lumen	Cellular Component	1	E2RL75
5	GO:0044451	nucleoplasm part	Cellular Component	1	E2RL75
5	GO:0099568	cytoplasmic region	Cellular Component	1	J9NU17
5	GO:0030864	cortical actin cytoskeleton	Cellular Component	1	J9NU17
5	GO:0005856	cytoskeleton	Cellular Component	4	J9NU17, J9P5Z0, J9P992, F1Q0N9
5	GO:0005634	nucleus	Cellular Component	1	E2RL75
6	GO:0005884	actin filament	Cellular Component	1	J9NU17
6	GO:1905369	endopeptidase complex	Cellular Component	2	E2QW34, E2R4H4
6	GO:0016591	DNA-directed RNA polymerase II, holoenzyme	Cellular Component	1	E2RL75
6	GO:0030863	cortical cytoskeleton	Cellular Component	1	J9NU17
6	GO:0061695	transferase complex, transferring phosphorus-containing groups	Cellular Component	1	E2RL75
6	GO:0045111	intermediate filament cytoskeleton	Cellular Component	1	F1Q0N9
6	GO:0015629	actin cytoskeleton	Cellular Component	3	J9NU17, J9P5Z0, J9P992
6	GO:0005882	intermediate filament	Cellular Component	1	F1Q0N9
6	GO:0000323	lytic vacuole	Cellular Component	1	E2RLF1
7	GO:0005764	lysosome	Cellular Component	1	E2RLF1

## Sheet: enrich
GO-ID	Term	Category	#Diff	#Ref	%Diff	%Ref	P-Value	FDR	Over/Under	DiffSeqs
GO:0020037	heme binding	F	6	11	13.9535	1.5919	1.70484e-05	0.0259078	OVER	P60529, J9JHF7, P60524, F1PYZ1, F1P8V6, P00011
GO:0046906	tetrapyrrole binding	F	6	12	13.9535	1.73661	3.24809e-05	0.0259078	OVER	P60529, J9JHF7, P60524, F1PYZ1, F1P8V6, P00011
GO:0015671	oxygen transport	P	5	8	11.6279	1.15774	4.02294e-05	0.0259078	OVER	P60529, J9JHF7, P60524, F1PYZ1, F1P8V6
GO:0015669	gas transport	P	5	8	11.6279	1.15774	4.02294e-05	0.0259078	OVER	P60529, J9JHF7, P60524, F1PYZ1, F1P8V6
GO:0019825	oxygen binding	F	5	8	11.6279	1.15774	4.02294e-05	0.0259078	OVER	P60529, J9JHF7, P60524, F1PYZ1, F1P8V6
GO:0005833	hemoglobin complex	C	4	8	9.30233	1.15774	0.000828422	0.444586	OVER	P60529, J9JHF7, P60524, F1PYZ1
GO:0022904	respiratory electron transport chain	P	2	2	4.65116	0.289436	0.00395792	1	OVER	C4MW55, P00011
GO:0022900	electron transport chain	P	2	2	4.65116	0.289436	0.00395792	1	OVER	C4MW55, P00011
GO:0009055	electron carrier activity	F	2	2	4.65116	0.289436	0.00395792	1	OVER	C4MW55, P00011
GO:0042775	mitochondrial ATP synthesis coupled electron transport	P	2	2	4.65116	0.289436	0.00395792	1	OVER	C4MW55, P00011
GO:0042773	ATP synthesis coupled electron transport	P	2	2	4.65116	0.289436	0.00395792	1	OVER	C4MW55, P00011
GO:0016459	myosin complex	C	3	6	6.97674	0.868307	0.00420076	1	OVER	J9NU17, J9P5Z0, J9P992
GO:0005506	iron ion binding	F	4	12	9.30233	1.73661	0.00484819	1	OVER	P60529, J9JHF7, P60524, F1PYZ1
GO:0044445	cytosolic part	C	4	13	9.30233	1.88133	0.00668017	1	OVER	P60529, J9JHF7, P60524, F1PYZ1
GO:0003774	motor activity	F	3	7	6.97674	1.01302	0.00702558	1	OVER	J9NU17, J9P5Z0, J9P992
GO:0006818	hydrogen transport	P	2	3	4.65116	0.434153	0.0113922	1	OVER	C4MW55, Q0QEN2
GO:0006119	oxidative phosphorylation	P	2	3	4.65116	0.434153	0.0113922	1	OVER	C4MW55, P00011
GO:0015992	proton transport	P	2	3	4.65116	0.434153	0.0113922	1	OVER	C4MW55, Q0QEN2
GO:0043234	protein complex	C	14	118	32.5581	17.0767	0.011689	1	OVER	C4MW55, P60529, J9NU17, J9JHF7, P60524, E2RL75, J9P4B4, F1Q0N9, F1PYZ1, J9P5Z0, E2R4H4, J9P992, E2QW34, Q0QEN2
GO:0015980	energy derivation by oxidation of organic compounds	P	3	9	6.97674	1.30246	0.0154047	1	OVER	C4MW55, F1PB77, P00011
GO:0032991	macromolecular complex	C	15	137	34.8837	19.8263	0.0185603	1	OVER	C4MW55, P60529, J9NU17, J9JHF7, P60524, E2RL75, J9P4B4, F1Q0N9, F1PYZ1, J9P5Z0, F1PJ74, E2R4H4, J9P992, E2QW34, Q0QEN2
GO:0015078	hydrogen ion transmembrane transporter activity	F	2	4	4.65116	0.578871	0.0218644	1	OVER	C4MW55, Q0QEN2
GO:1901363	heterocyclic compound binding	F	12	98	27.907	14.1823	0.0219424	1	OVER	P60529, J9NU17, J9JHF7, P60524, F1PYZ1, F1PB77, E2R5H4, F1P8V6, J9P992, P00011, F1PGC3, Q0QEN2
GO:0097159	organic cyclic compound binding	F	12	99	27.907	14.3271	0.0225564	1	OVER	P60529, J9NU17, J9JHF7, P60524, F1PYZ1, F1PB77, E2R5H4, F1P8V6, J9P992, P00011, F1PGC3, Q0QEN2
GO:0015077	monovalent inorganic cation transmembrane transporter activity	F	2	5	4.65116	0.723589	0.0349753	1	OVER	C4MW55, Q0QEN2
GO:0015672	monovalent inorganic cation transport	P	2	5	4.65116	0.723589	0.0349753	1	OVER	C4MW55, Q0QEN2
GO:0065007	biological regulation	P	12	297	27.907	42.9812	0.037957	1	UNDER	F6Y5M8, F1PDY8, J9NS29, F1P6H7, J9P8M2, J9P4B4, E2R5H4, E2RLF1, E2R7A3, F1PJ74, J9NVE9, E2R997
GO:0044763	single-organism cellular process	P	12	293	27.907	42.4023	0.0387175	1	UNDER	C4MW55, F1PDY8, F1P6H7, F1PB77, E2R5H4, E2RLF1, E2R7A3, F1PJ74, J9NVE9, E2R357, P00011, Q0QEN2
GO:0005515	protein binding	F	13	313	30.2326	45.2967	0.0388854	1	UNDER	F1P6H7, J9NU17, F1P8A6, J9P8M2, J9P4B4, E2R5H4, E2R7A3, F1PJ74, J9P9B9, J9P992, E2QYB2, F1PGC3, E2QUU8
GO:0015629	actin cytoskeleton	C	3	13	6.97674	1.88133	0.0438329	1	OVER	J9NU17, J9P5Z0, J9P992
GO:0050896	response to stimulus	P	8	221	18.6047	31.9826	0.0441819	1	UNDER	J9PB81, F1PDY8, J9P4B4, E2RLF1, E2R7A3, F1PJ74, J9NVE9, F1PGC3
GO:0006950	response to stress	P	1	83	2.32558	12.0116	0.0500722	1	UNDER	J9NVE9
GO:0045333	cellular respiration	P	2	6	4.65116	0.868307	0.0503625	1	OVER	C4MW55, P00011
GO:0044421	extracellular region part	C	6	186	13.9535	26.9175	0.0506237	1	UNDER	J9P8M2, J9P4B4, E2RLF1, F1PJ74, F1PIF2, J9PBN6
GO:0017111	nucleoside-triphosphatase activity	F	4	23	9.30233	3.32851	0.051773	1	OVER	J9NU17, J9P5Z0, J9P992, Q0QEN2
GO:0016818	hydrolase activity, acting on acid anhydrides, in phosphorus-containing anhydrides	F	4	24	9.30233	3.47323	0.0593035	1	OVER	J9NU17, J9P5Z0, J9P992, Q0QEN2
GO:0016817	hydrolase activity, acting on acid anhydrides	F	4	24	9.30233	3.47323	0.0593035	1	OVER	J9NU17, J9P5Z0, J9P992, Q0QEN2
GO:0016462	pyrophosphatase activity	F	4	24	9.30233	3.47323	0.0593035	1	OVER	J9NU17, J9P5Z0, J9P992, Q0QEN2
GO:0002161	aminoacyl-tRNA editing activity	F	1	1	2.32558	0.144718	0.0636095	1	OVER	F6Y5M8
GO:0006450	regulation of translational fidelity	P	1	1	2.32558	0.144718	0.0636095	1	OVER	F6Y5M8
GO:0006448	regulation of translational elongation	P	1	1	2.32558	0.144718	0.0636095	1	OVER	F6Y5M8
GO:0033138	positive regulation of peptidyl-serine phosphorylation	P	1	1	2.32558	0.144718	0.0636095	1	OVER	J9NVE9
GO:0033135	regulation of peptidyl-serine phosphorylation	P	1	1	2.32558	0.144718	0.0636095	1	OVER	J9NVE9
GO:0006414	translational elongation	P	1	1	2.32558	0.144718	0.0636095	1	OVER	F6Y5M8
GO:0032039	integrator complex	C	1	1	2.32558	0.144718	0.0636095	1	OVER	E2RL75
GO:0005903	brush border	C	1	1	2.32558	0.144718	0.0636095	1	OVER	J9NU17
GO:0005902	microvillus	C	1	1	2.32558	0.144718	0.0636095	1	OVER	J9NU17
GO:0016180	snRNA processing	P	1	1	2.32558	0.144718	0.0636095	1	OVER	E2RL75
GO:0015002	heme-copper terminal oxidase activity	F	1	1	2.32558	0.144718	0.0636095	1	OVER	C4MW55
GO:0004129	cytochrome-c oxidase activity	F	1	1	2.32558	0.144718	0.0636095	1	OVER	C4MW55
GO:0048232	male gamete generation	P	1	1	2.32558	0.144718	0.0636095	1	OVER	E2R357
GO:0016073	snRNA metabolic process	P	1	1	2.32558	0.144718	0.0636095	1	OVER	E2RL75
GO:0010739	positive regulation of protein kinase A signaling	P	1	1	2.32558	0.144718	0.0636095	1	OVER	J9NVE9
GO:0010738	regulation of protein kinase A signaling	P	1	1	2.32558	0.144718	0.0636095	1	OVER	J9NVE9
GO:0010737	protein kinase A signaling	P	1	1	2.32558	0.144718	0.0636095	1	OVER	J9NVE9
GO:0016676	oxidoreductase activity, acting on a heme group of donors, oxygen as acceptor	F	1	1	2.32558	0.144718	0.0636095	1	OVER	C4MW55
GO:0016675	oxidoreductase activity, acting on a heme group of donors	F	1	1	2.32558	0.144718	0.0636095	1	OVER	C4MW55
GO:0070069	cytochrome complex	C	1	1	2.32558	0.144718	0.0636095	1	OVER	C4MW55
GO:0007283	spermatogenesis	P	1	1	2.32558	0.144718	0.0636095	1	OVER	E2R357
GO:0030850	prostate gland development	P	1	1	2.32558	0.144718	0.0636095	1	OVER	E2RLF1
GO:0006123	mitochondrial electron transport, cytochrome c to oxygen	P	1	1	2.32558	0.144718	0.0636095	1	OVER	C4MW55
GO:0098803	respiratory chain complex	C	1	1	2.32558	0.144718	0.0636095	1	OVER	C4MW55
GO:0006665	sphingolipid metabolic process	P	1	1	2.32558	0.144718	0.0636095	1	OVER	E2RLF1
GO:0070469	respiratory chain	C	1	1	2.32558	0.144718	0.0636095	1	OVER	C4MW55
GO:0045277	respiratory chain complex IV	C	1	1	2.32558	0.144718	0.0636095	1	OVER	C4MW55
GO:0050807	regulation of synapse organization	P	1	1	2.32558	0.144718	0.0636095	1	OVER	F1PJ74
GO:0016323	basolateral plasma membrane	C	1	1	2.32558	0.144718	0.0636095	1	OVER	J9NU17
GO:0035457	cellular response to interferon-alpha	P	1	1	2.32558	0.144718	0.0636095	1	OVER	F1PGC3
GO:0035455	response to interferon-alpha	P	1	1	2.32558	0.144718	0.0636095	1	OVER	F1PGC3
GO:0044700	single organism signaling	P	2	96	4.65116	13.8929	0.0704185	1	UNDER	E2R7A3, J9NVE9
GO:0005615	extracellular space	C	2	96	4.65116	13.8929	0.0704185	1	UNDER	F1PJ74, J9PBN6
GO:0023052	signaling	P	2	98	4.65116	14.1823	0.0706782	1	UNDER	E2R7A3, J9NVE9
GO:0007154	cell communication	P	2	99	4.65116	14.3271	0.0711466	1	UNDER	E2R7A3, J9NVE9
GO:0050789	regulation of biological process	P	11	261	25.5814	37.7713	0.0761537	1	UNDER	F6Y5M8, F1PDY8, J9NS29, F1P6H7, J9P8M2, J9P4B4, E2R5H4, E2RLF1, E2R7A3, F1PJ74, J9NVE9
GO:0005829	cytosol	C	4	27	9.30233	3.90738	0.0852243	1	OVER	P60529, J9JHF7, P60524, F1PYZ1
GO:0044702	single organism reproductive process	P	2	8	4.65116	1.15774	0.0866818	1	OVER	E2RLF1, E2R357
GO:0005739	mitochondrion	C	2	8	4.65116	1.15774	0.0866818	1	OVER	P00011, Q0QEN2
GO:0019216	regulation of lipid metabolic process	P	2	8	4.65116	1.15774	0.0866818	1	OVER	F1PJ74, J9NVE9
GO:0022414	reproductive process	P	2	8	4.65116	1.15774	0.0866818	1	OVER	E2RLF1, E2R357
GO:0005488	binding	F	24	460	55.814	66.5702	0.0905157	1	UNDER	C4MW55, P60529, F1P6H7, J9NU17, J9JHF7, P60524, E2RL75, F1P8A6, J9P8M2, J9P4B4, J9NYN2, F1PYZ1, F1PB77, E2R5H4, F1P8V6, E2R7A3, F1PJ74, J9P9B9, J9P992, E2QYB2, P00011, F1PGC3, Q0QEN2, E2QUU8
GO:0009199	ribonucleoside triphosphate metabolic process	P	3	18	6.97674	2.60492	0.100182	1	OVER	C4MW55, P00011, Q0QEN2
GO:0009167	purine ribonucleoside monophosphate metabolic process	P	3	18	6.97674	2.60492	0.100182	1	OVER	C4MW55, P00011, Q0QEN2
GO:0009161	ribonucleoside monophosphate metabolic process	P	3	18	6.97674	2.60492	0.100182	1	OVER	C4MW55, P00011, Q0QEN2
GO:0009144	purine nucleoside triphosphate metabolic process	P	3	18	6.97674	2.60492	0.100182	1	OVER	C4MW55, P00011, Q0QEN2
GO:0009141	nucleoside triphosphate metabolic process	P	3	18	6.97674	2.60492	0.100182	1	OVER	C4MW55, P00011, Q0QEN2
GO:0009126	purine nucleoside monophosphate metabolic process	P	3	18	6.97674	2.60492	0.100182	1	OVER	C4MW55, P00011, Q0QEN2
GO:0009123	nucleoside monophosphate metabolic process	P	3	18	6.97674	2.60492	0.100182	1	OVER	C4MW55, P00011, Q0QEN2
GO:0009119	ribonucleoside metabolic process	P	3	18	6.97674	2.60492	0.100182	1	OVER	C4MW55, P00011, Q0QEN2
GO:0009116	nucleoside metabolic process	P	3	18	6.97674	2.60492	0.100182	1	OVER	C4MW55, P00011, Q0QEN2
GO:1901657	glycosyl compound metabolic process	P	3	18	6.97674	2.60492	0.100182	1	OVER	C4MW55, P00011, Q0QEN2
GO:0046128	purine ribonucleoside metabolic process	P	3	18	6.97674	2.60492	0.100182	1	OVER	C4MW55, P00011, Q0QEN2
GO:0046034	ATP metabolic process	P	3	18	6.97674	2.60492	0.100182	1	OVER	C4MW55, P00011, Q0QEN2
GO:0042278	purine nucleoside metabolic process	P	3	18	6.97674	2.60492	0.100182	1	OVER	C4MW55, P00011, Q0QEN2
GO:0009205	purine ribonucleoside triphosphate metabolic process	P	3	18	6.97674	2.60492	0.100182	1	OVER	C4MW55, P00011, Q0QEN2
GO:0007165	signal transduction	P	2	92	4.65116	13.314	0.104051	1	UNDER	E2R7A3, J9NVE9
GO:0005509	calcium ion binding	F	0	45	0	6.5123	0.104467	1	UNDER
GO:0009987	cellular process	P	20	400	46.5116	57.8871	0.107874	1	UNDER	C4MW55, F6Y5M8, F1PDY8, J9NS29, F1P6H7, E2RL75, J9P8M2, F1PB77, E2R5H4, E2RLF1, E2R7A3, F1PJ74, E2R4H4, J9NVE9, J9P992, E2R357, P00011, E2QW34, F1PGC3, Q0QEN2
GO:0006955	immune response	P	1	64	2.32558	9.26194	0.110868	1	UNDER	J9P4B4
GO:0046914	transition metal ion binding	F	6	48	13.9535	6.94645	0.113003	1	OVER	C4MW55, P60529, J9JHF7, P60524, J9NYN2, F1PYZ1
GO:0009150	purine ribonucleotide metabolic process	P	3	19	6.97674	2.74964	0.113844	1	OVER	C4MW55, P00011, Q0QEN2
GO:0006163	purine nucleotide metabolic process	P	3	19	6.97674	2.74964	0.113844	1	OVER	C4MW55, P00011, Q0QEN2
GO:0009259	ribonucleotide metabolic process	P	3	19	6.97674	2.74964	0.113844	1	OVER	C4MW55, P00011, Q0QEN2
GO:0044769	ATPase activity, coupled to transmembrane movement of ions, rotational mechanism	F	1	2	2.32558	0.289436	0.123261	1	OVER	Q0QEN2
GO:0046933	proton-transporting ATP synthase activity, rotational mechanism	F	1	2	2.32558	0.289436	0.123261	1	OVER	Q0QEN2
GO:0072522	purine-containing compound biosynthetic process	P	1	2	2.32558	0.289436	0.123261	1	OVER	Q0QEN2
GO:0009168	purine ribonucleoside monophosphate biosynthetic process	P	1	2	2.32558	0.289436	0.123261	1	OVER	Q0QEN2
GO:0009163	nucleoside biosynthetic process	P	1	2	2.32558	0.289436	0.123261	1	OVER	Q0QEN2
GO:0009156	ribonucleoside monophosphate biosynthetic process	P	1	2	2.32558	0.289436	0.123261	1	OVER	Q0QEN2
GO:0009152	purine ribonucleotide biosynthetic process	P	1	2	2.32558	0.289436	0.123261	1	OVER	Q0QEN2
GO:0009145	purine nucleoside triphosphate biosynthetic process	P	1	2	2.32558	0.289436	0.123261	1	OVER	Q0QEN2
GO:0009142	nucleoside triphosphate biosynthetic process	P	1	2	2.32558	0.289436	0.123261	1	OVER	Q0QEN2
GO:0070997	neuron death	P	1	2	2.32558	0.289436	0.123261	1	OVER	F1PJ74
GO:0001655	urogenital system development	P	1	2	2.32558	0.289436	0.123261	1	OVER	E2RLF1
GO:0009127	purine nucleoside monophosphate biosynthetic process	P	1	2	2.32558	0.289436	0.123261	1	OVER	Q0QEN2
GO:0009124	nucleoside monophosphate biosynthetic process	P	1	2	2.32558	0.289436	0.123261	1	OVER	Q0QEN2
GO:0033178	proton-transporting two-sector ATPase complex, catalytic domain	C	1	2	2.32558	0.289436	0.123261	1	OVER	Q0QEN2
GO:0034248	regulation of cellular amide metabolic process	P	1	2	2.32558	0.289436	0.123261	1	OVER	F6Y5M8
GO:0046890	regulation of lipid biosynthetic process	P	1	2	2.32558	0.289436	0.123261	1	OVER	F1PJ74
GO:0006417	regulation of translation	P	1	2	2.32558	0.289436	0.123261	1	OVER	F6Y5M8
GO:0042455	ribonucleoside biosynthetic process	P	1	2	2.32558	0.289436	0.123261	1	OVER	Q0QEN2
GO:0042451	purine nucleoside biosynthetic process	P	1	2	2.32558	0.289436	0.123261	1	OVER	Q0QEN2
GO:1901659	glycosyl compound biosynthetic process	P	1	2	2.32558	0.289436	0.123261	1	OVER	Q0QEN2
GO:0046129	purine ribonucleoside biosynthetic process	P	1	2	2.32558	0.289436	0.123261	1	OVER	Q0QEN2
GO:0009615	response to virus	P	1	2	2.32558	0.289436	0.123261	1	OVER	F1PGC3
GO:0061458	reproductive system development	P	1	2	2.32558	0.289436	0.123261	1	OVER	E2RLF1
GO:0051648	vesicle localization	P	1	2	2.32558	0.289436	0.123261	1	OVER	J9NU17
GO:0051640	organelle localization	P	1	2	2.32558	0.289436	0.123261	1	OVER	J9NU17
GO:0032504	multicellular organism reproduction	P	1	2	2.32558	0.289436	0.123261	1	OVER	E2R357
GO:1902600	hydrogen ion transmembrane transport	P	1	2	2.32558	0.289436	0.123261	1	OVER	Q0QEN2
GO:0018209	peptidyl-serine modification	P	1	2	2.32558	0.289436	0.123261	1	OVER	J9NVE9
GO:0004645	phosphorylase activity	F	1	2	2.32558	0.289436	0.123261	1	OVER	F1PB77
GO:0007276	gamete generation	P	1	2	2.32558	0.289436	0.123261	1	OVER	E2R357
GO:0018105	peptidyl-serine phosphorylation	P	1	2	2.32558	0.289436	0.123261	1	OVER	J9NVE9
GO:0031941	filamentous actin	C	1	2	2.32558	0.289436	0.123261	1	OVER	J9NU17
GO:0006164	purine nucleotide biosynthetic process	P	1	2	2.32558	0.289436	0.123261	1	OVER	Q0QEN2
GO:0016591	DNA-directed RNA polymerase II, holoenzyme	C	1	2	2.32558	0.289436	0.123261	1	OVER	E2RL75
GO:0006118	obsolete electron transport	P	1	2	2.32558	0.289436	0.123261	1	OVER	P00011
GO:0048732	gland development	P	1	2	2.32558	0.289436	0.123261	1	OVER	E2RLF1
GO:0006754	ATP biosynthetic process	P	1	2	2.32558	0.289436	0.123261	1	OVER	Q0QEN2
GO:0050996	positive regulation of lipid catabolic process	P	1	2	2.32558	0.289436	0.123261	1	OVER	J9NVE9
GO:0050994	regulation of lipid catabolic process	P	1	2	2.32558	0.289436	0.123261	1	OVER	J9NVE9
GO:0016469	proton-transporting two-sector ATPase complex	C	1	2	2.32558	0.289436	0.123261	1	OVER	Q0QEN2
GO:0048609	multicellular organismal reproductive process	P	1	2	2.32558	0.289436	0.123261	1	OVER	E2R357
GO:0048608	reproductive structure development	P	1	2	2.32558	0.289436	0.123261	1	OVER	E2RLF1
GO:0006643	membrane lipid metabolic process	P	1	2	2.32558	0.289436	0.123261	1	OVER	E2RLF1
GO:0015991	ATP hydrolysis coupled proton transport	P	1	2	2.32558	0.289436	0.123261	1	OVER	Q0QEN2
GO:0015988	energy coupled proton transmembrane transport, against electrochemical gradient	P	1	2	2.32558	0.289436	0.123261	1	OVER	Q0QEN2
GO:0015986	ATP synthesis coupled proton transport	P	1	2	2.32558	0.289436	0.123261	1	OVER	Q0QEN2
GO:0015985	energy coupled proton transport, down electrochemical gradient	P	1	2	2.32558	0.289436	0.123261	1	OVER	Q0QEN2
GO:0008184	glycogen phosphorylase activity	F	1	2	2.32558	0.289436	0.123261	1	OVER	F1PB77
GO:0009260	ribonucleotide biosynthetic process	P	1	2	2.32558	0.289436	0.123261	1	OVER	Q0QEN2
GO:1901214	regulation of neuron death	P	1	2	2.32558	0.289436	0.123261	1	OVER	F1PJ74
GO:0046390	ribose phosphate biosynthetic process	P	1	2	2.32558	0.289436	0.123261	1	OVER	Q0QEN2
GO:0009206	purine ribonucleoside triphosphate biosynthetic process	P	1	2	2.32558	0.289436	0.123261	1	OVER	Q0QEN2
GO:0009201	ribonucleoside triphosphate biosynthetic process	P	1	2	2.32558	0.289436	0.123261	1	OVER	Q0QEN2
GO:0050803	regulation of synapse structure or activity	P	1	2	2.32558	0.289436	0.123261	1	OVER	F1PJ74
GO:0045259	proton-transporting ATP synthase complex	C	1	2	2.32558	0.289436	0.123261	1	OVER	Q0QEN2
GO:0016328	lateral plasma membrane	C	1	2	2.32558	0.289436	0.123261	1	OVER	J9NU17
GO:0030554	adenyl nucleotide binding	F	4	31	9.30233	4.48625	0.127063	1	OVER	J9NU17, E2R5H4, J9P992, Q0QEN2
GO:0032559	adenyl ribonucleotide binding	F	4	31	9.30233	4.48625	0.127063	1	OVER	J9NU17, E2R5H4, J9P992, Q0QEN2
GO:0005524	ATP binding	F	4	31	9.30233	4.48625	0.127063	1	OVER	J9NU17, E2R5H4, J9P992, Q0QEN2
GO:0051704	multi-organism process	P	3	20	6.97674	2.89436	0.128185	1	OVER	J9PB81, E2R357, F1PGC3
GO:0005576	extracellular region	C	10	230	23.2558	33.2851	0.136814	1	UNDER	J9P8M2, J9P4B4, E2RLF1, F1PJ74, J9NVE9, F1PIF2, J9PBN6, F1PNY4, E2RKW4, E2QXH0
GO:0006629	lipid metabolic process	P	4	32	9.30233	4.63097	0.1387	1	OVER	E2RLF1, F1PJ74, J9NVE9, E2QXH0
GO:0016020	membrane	C	6	160	13.9535	23.1548	0.139955	1	UNDER	C4MW55, J9NU17, J9NZW6, F1P8A6, E2R7A3, Q0QEN2
GO:0044765	single-organism transport	P	8	80	18.6047	11.5774	0.148827	1	OVER	C4MW55, P60529, J9JHF7, P60524, F1PYZ1, F1P8V6, F1PJ74, Q0QEN2
GO:0022890	inorganic cation transmembrane transporter activity	F	2	11	4.65116	1.5919	0.150969	1	OVER	C4MW55, Q0QEN2
GO:0051707	response to other organism	P	2	11	4.65116	1.5919	0.150969	1	OVER	J9PB81, F1PGC3
GO:0009607	response to biotic stimulus	P	2	11	4.65116	1.5919	0.150969	1	OVER	J9PB81, F1PGC3
GO:0008324	cation transmembrane transporter activity	F	2	11	4.65116	1.5919	0.150969	1	OVER	C4MW55, Q0QEN2
GO:0043207	response to external biotic stimulus	P	2	11	4.65116	1.5919	0.150969	1	OVER	J9PB81, F1PGC3
GO:0044699	single-organism process	P	20	388	46.5116	56.1505	0.152591	1	UNDER	C4MW55, F1PDY8, P60529, F1P6H7, J9NU17, J9JHF7, P60524, J9P4B4, F1PYZ1, F1PB77, E2R5H4, E2RLF1, F1P8V6, E2R7A3, F1PJ74, J9NVE9, E2R357, P00011, Q0QEN2, E2QXH0
GO:0009653	anatomical structure morphogenesis	P	0	35	0	5.06512	0.15792	1	UNDER
GO:0019752	carboxylic acid metabolic process	P	0	35	0	5.06512	0.15792	1	UNDER
GO:0072521	purine-containing compound metabolic process	P	3	22	6.97674	3.18379	0.158673	1	OVER	C4MW55, P00011, Q0QEN2
GO:0016192	vesicle-mediated transport	P	0	37	0	5.35456	0.159765	1	UNDER
GO:0043436	oxoacid metabolic process	P	0	37	0	5.35456	0.159765	1	UNDER
GO:0006082	organic acid metabolic process	P	0	38	0	5.49928	0.161876	1	UNDER
GO:0044085	cellular component biogenesis	P	0	39	0	5.64399	0.164741	1	UNDER
GO:0070062	extracellular exosome	C	1	61	2.32558	8.82779	0.165015	1	UNDER	J9P4B4
GO:0065010	extracellular membrane-bounded organelle	C	1	61	2.32558	8.82779	0.165015	1	UNDER	J9P4B4
GO:0043230	extracellular organelle	C	1	61	2.32558	8.82779	0.165015	1	UNDER	J9P4B4
GO:0005634	nucleus	C	1	61	2.32558	8.82779	0.165015	1	UNDER	E2RL75
GO:1903561	extracellular vesicle	C	1	61	2.32558	8.82779	0.165015	1	UNDER	J9P4B4
GO:0052689	carboxylic ester hydrolase activity	F	2	12	4.65116	1.73661	0.174111	1	OVER	F6Y5M8, E2QXH0
GO:0006091	generation of precursor metabolites and energy	P	3	23	6.97674	3.32851	0.174708	1	OVER	C4MW55, F1PB77, P00011
GO:0044703	multi-organism reproductive process	P	1	3	2.32558	0.434153	0.179195	1	OVER	E2R357
GO:0009165	nucleotide biosynthetic process	P	1	3	2.32558	0.434153	0.179195	1	OVER	Q0QEN2
GO:0005977	glycogen metabolic process	P	1	3	2.32558	0.434153	0.179195	1	OVER	F1PB77
GO:0005938	cell cortex	C	1	3	2.32558	0.434153	0.179195	1	OVER	J9NU17
GO:0000428	DNA-directed RNA polymerase complex	C	1	3	2.32558	0.434153	0.179195	1	OVER	E2RL75
GO:0003006	developmental process involved in reproduction	P	1	3	2.32558	0.434153	0.179195	1	OVER	E2RLF1
GO:0005884	actin filament	C	1	3	2.32558	0.434153	0.179195	1	OVER	J9NU17
GO:0006953	acute-phase response	P	1	3	2.32558	0.434153	0.179195	1	OVER	J9NVE9
GO:0019953	sexual reproduction	P	1	3	2.32558	0.434153	0.179195	1	OVER	E2R357
GO:0044448	cell cortex part	C	1	3	2.32558	0.434153	0.179195	1	OVER	J9NU17
GO:0030880	RNA polymerase complex	C	1	3	2.32558	0.434153	0.179195	1	OVER	E2RL75
GO:0030864	cortical actin cytoskeleton	C	1	3	2.32558	0.434153	0.179195	1	OVER	J9NU17
GO:0030863	cortical cytoskeleton	C	1	3	2.32558	0.434153	0.179195	1	OVER	J9NU17
GO:0006112	energy reserve metabolic process	P	1	3	2.32558	0.434153	0.179195	1	OVER	F1PB77
GO:0008234	cysteine-type peptidase activity	F	1	3	2.32558	0.434153	0.179195	1	OVER	F1PIF2
GO:1901293	nucleoside phosphate biosynthetic process	P	1	3	2.32558	0.434153	0.179195	1	OVER	Q0QEN2
GO:0055029	nuclear DNA-directed RNA polymerase complex	C	1	3	2.32558	0.434153	0.179195	1	OVER	E2RL75
GO:0050808	synapse organization	P	1	3	2.32558	0.434153	0.179195	1	OVER	F1PJ74
GO:0044444	cytoplasmic part	C	9	96	20.9302	13.8929	0.181244	1	OVER	P60529, J9NU17, J9JHF7, P60524, F1PYZ1, E2RLF1, F1PIF2, P00011, Q0QEN2
GO:0019693	ribose phosphate metabolic process	P	3	24	6.97674	3.47323	0.191195	1	OVER	C4MW55, P00011, Q0QEN2
GO:0009892	negative regulation of metabolic process	P	3	24	6.97674	3.47323	0.191195	1	OVER	J9NS29, F1PJ74, J9NVE9
GO:0015075	ion transmembrane transporter activity	F	2	13	4.65116	1.88133	0.197798	1	OVER	C4MW55, Q0QEN2
GO:0009117	nucleotide metabolic process	P	3	25	6.97674	3.61795	0.208077	1	OVER	C4MW55, P00011, Q0QEN2
GO:0006753	nucleoside phosphate metabolic process	P	3	25	6.97674	3.61795	0.208077	1	OVER	C4MW55, P00011, Q0QEN2
GO:0032268	regulation of cellular protein metabolic process	P	3	25	6.97674	3.61795	0.208077	1	OVER	F6Y5M8, F1PJ74, J9NVE9
GO:0044707	single-multicellular organism process	P	4	117	9.30233	16.932	0.209732	1	UNDER	J9NU17, E2R5H4, E2RLF1, F1PJ74
GO:0065008	regulation of biological quality	P	2	80	4.65116	11.5774	0.217209	1	UNDER	F6Y5M8, F1PJ74
GO:0016787	hydrolase activity	F	11	124	25.5814	17.945	0.221226	1	OVER	F6Y5M8, J9PB81, J9NU17, J9P5Z0, E2R7A3, E2R4H4, J9P992, F1PIF2, E2QW34, Q0QEN2, E2QXH0
GO:0004298	threonine-type endopeptidase activity	F	2	14	4.65116	2.02605	0.221873	1	OVER	E2R4H4, E2QW34
GO:0022891	substrate-specific transmembrane transporter activity	F	2	14	4.65116	2.02605	0.221873	1	OVER	C4MW55, Q0QEN2
GO:0005839	proteasome core complex	C	2	14	4.65116	2.02605	0.221873	1	OVER	E2R4H4, E2QW34
GO:0070003	threonine-type peptidase activity	F	2	14	4.65116	2.02605	0.221873	1	OVER	E2R4H4, E2QW34
GO:1902578	single-organism localization	P	8	83	18.6047	12.0116	0.225036	1	OVER	C4MW55, P60529, J9JHF7, P60524, F1PYZ1, F1P8V6, F1PJ74, Q0QEN2
GO:0055086	nucleobase-containing small molecule metabolic process	P	3	26	6.97674	3.76266	0.225299	1	OVER	C4MW55, P00011, Q0QEN2
GO:0007605	sensory perception of sound	P	1	4	2.32558	0.578871	0.231639	1	OVER	J9NU17
GO:0070374	positive regulation of ERK1 and ERK2 cascade	P	1	4	2.32558	0.578871	0.231639	1	OVER	J9NVE9
GO:0070372	regulation of ERK1 and ERK2 cascade	P	1	4	2.32558	0.578871	0.231639	1	OVER	J9NVE9
GO:0044042	glucan metabolic process	P	1	4	2.32558	0.578871	0.231639	1	OVER	F1PB77
GO:0008610	lipid biosynthetic process	P	1	4	2.32558	0.578871	0.231639	1	OVER	F1PJ74
GO:0016820	hydrolase activity, acting on acid anhydrides, catalyzing transmembrane movement of substances	F	1	4	2.32558	0.578871	0.231639	1	OVER	Q0QEN2
GO:0005976	polysaccharide metabolic process	P	1	4	2.32558	0.578871	0.231639	1	OVER	F1PB77
GO:0090407	organophosphate biosynthetic process	P	1	4	2.32558	0.578871	0.231639	1	OVER	Q0QEN2
GO:0098590	plasma membrane region	C	1	4	2.32558	0.578871	0.231639	1	OVER	J9NU17
GO:0016125	sterol metabolic process	P	1	4	2.32558	0.578871	0.231639	1	OVER	F1PJ74
GO:0002526	acute inflammatory response	P	1	4	2.32558	0.578871	0.231639	1	OVER	J9NVE9
GO:1902652	secondary alcohol metabolic process	P	1	4	2.32558	0.578871	0.231639	1	OVER	F1PJ74
GO:0044429	mitochondrial part	C	1	4	2.32558	0.578871	0.231639	1	OVER	Q0QEN2
GO:0018193	peptidyl-amino acid modification	P	1	4	2.32558	0.578871	0.231639	1	OVER	J9NVE9
GO:0010608	posttranscriptional regulation of gene expression	P	1	4	2.32558	0.578871	0.231639	1	OVER	F6Y5M8
GO:0019829	cation-transporting ATPase activity	F	1	4	2.32558	0.578871	0.231639	1	OVER	Q0QEN2
GO:0015405	P-P-bond-hydrolysis-driven transmembrane transporter activity	F	1	4	2.32558	0.578871	0.231639	1	OVER	Q0QEN2
GO:0030170	pyridoxal phosphate binding	F	1	4	2.32558	0.578871	0.231639	1	OVER	F1PB77
GO:0006073	cellular glucan metabolic process	P	1	4	2.32558	0.578871	0.231639	1	OVER	F1PB77
GO:0050954	sensory perception of mechanical stimulus	P	1	4	2.32558	0.578871	0.231639	1	OVER	J9NU17
GO:0008203	cholesterol metabolic process	P	1	4	2.32558	0.578871	0.231639	1	OVER	F1PJ74
GO:0015399	primary active transmembrane transporter activity	F	1	4	2.32558	0.578871	0.231639	1	OVER	Q0QEN2
GO:0044264	cellular polysaccharide metabolic process	P	1	4	2.32558	0.578871	0.231639	1	OVER	F1PB77
GO:0000003	reproduction	P	1	4	2.32558	0.578871	0.231639	1	OVER	E2R357
GO:0042626	ATPase activity, coupled to transmembrane movement of substances	F	1	4	2.32558	0.578871	0.231639	1	OVER	Q0QEN2
GO:0042625	ATPase activity, coupled to transmembrane movement of ions	F	1	4	2.32558	0.578871	0.231639	1	OVER	Q0QEN2
GO:0048589	developmental growth	P	1	4	2.32558	0.578871	0.231639	1	OVER	E2RLF1
GO:0034369	plasma lipoprotein particle remodeling	P	1	4	2.32558	0.578871	0.231639	1	OVER	F1PJ74
GO:0034368	protein-lipid complex remodeling	P	1	4	2.32558	0.578871	0.231639	1	OVER	F1PJ74
GO:0034367	macromolecular complex remodeling	P	1	4	2.32558	0.578871	0.231639	1	OVER	F1PJ74
GO:0050794	regulation of cellular process	P	10	220	23.2558	31.8379	0.238516	1	UNDER	F6Y5M8, F1PDY8, J9NS29, F1P6H7, J9P8M2, E2R5H4, E2RLF1, E2R7A3, F1PJ74, J9NVE9
GO:0000502	proteasome complex	C	2	15	4.65116	2.17077	0.246193	1	OVER	E2R4H4, E2QW34
GO:1901566	organonitrogen compound biosynthetic process	P	2	15	4.65116	2.17077	0.246193	1	OVER	F6Y5M8, Q0QEN2
GO:0016301	kinase activity	F	2	15	4.65116	2.17077	0.246193	1	OVER	L7N0L9, E2R5H4
GO:0006897	endocytosis	P	0	28	0	4.0521	0.247631	1	UNDER
GO:0012505	endomembrane system	C	0	29	0	4.19682	0.247722	1	UNDER
GO:0022607	cellular component assembly	P	0	29	0	4.19682	0.247722	1	UNDER
GO:0009611	response to wounding	P	0	30	0	4.34153	0.248962	1	UNDER
GO:0022857	transmembrane transporter activity	F	2	16	4.65116	2.31548	0.270634	1	OVER	C4MW55, Q0QEN2
GO:0051603	proteolysis involved in cellular protein catabolic process	P	2	16	4.65116	2.31548	0.270634	1	OVER	E2R4H4, E2QW34
GO:0044257	cellular protein catabolic process	P	2	16	4.65116	2.31548	0.270634	1	OVER	E2R4H4, E2QW34
GO:0044430	cytoskeletal part	C	4	36	9.30233	5.20984	0.277144	1	OVER	J9NU17, F1Q0N9, J9P5Z0, J9P992
GO:0070371	ERK1 and ERK2 cascade	P	1	5	2.32558	0.723589	0.280805	1	OVER	J9NVE9
GO:0045834	positive regulation of lipid metabolic process	P	1	5	2.32558	0.723589	0.280805	1	OVER	J9NVE9
GO:0061695	transferase complex, transferring phosphorus-containing groups	C	1	5	2.32558	0.723589	0.280805	1	OVER	E2RL75
GO:0051129	negative regulation of cellular component organization	P	1	5	2.32558	0.723589	0.280805	1	OVER	F1PJ74
GO:0004869	cysteine-type endopeptidase inhibitor activity	F	1	5	2.32558	0.723589	0.280805	1	OVER	J9NS29
GO:0098589	membrane region	C	1	5	2.32558	0.723589	0.280805	1	OVER	J9NU17
GO:0043492	ATPase activity, coupled to movement of substances	F	1	5	2.32558	0.723589	0.280805	1	OVER	Q0QEN2
GO:0044451	nucleoplasm part	C	1	5	2.32558	0.723589	0.280805	1	OVER	E2RL75
GO:0008202	steroid metabolic process	P	1	5	2.32558	0.723589	0.280805	1	OVER	F1PJ74
GO:0034470	ncRNA processing	P	1	5	2.32558	0.723589	0.280805	1	OVER	E2RL75
GO:0005507	copper ion binding	F	1	5	2.32558	0.723589	0.280805	1	OVER	C4MW55
GO:0009896	positive regulation of catabolic process	P	1	5	2.32558	0.723589	0.280805	1	OVER	J9NVE9
GO:0016310	phosphorylation	P	4	37	9.30233	5.35456	0.284751	1	OVER	C4MW55, E2R5H4, J9NVE9, P00011
GO:0044265	cellular macromolecule catabolic process	P	2	17	4.65116	2.4602	0.295085	1	OVER	E2R4H4, E2QW34
GO:0031988	membrane-bounded vesicle	C	2	68	4.65116	9.84081	0.299322	1	UNDER	J9P4B4, E2QXH0
GO:0032555	purine ribonucleotide binding	F	4	39	9.30233	5.64399	0.301962	1	OVER	J9NU17, E2R5H4, J9P992, Q0QEN2
GO:0032550	purine ribonucleoside binding	F	4	39	9.30233	5.64399	0.301962	1	OVER	J9NU17, E2R5H4, J9P992, Q0QEN2
GO:0032549	ribonucleoside binding	F	4	39	9.30233	5.64399	0.301962	1	OVER	J9NU17, E2R5H4, J9P992, Q0QEN2
GO:0017076	purine nucleotide binding	F	4	39	9.30233	5.64399	0.301962	1	OVER	J9NU17, E2R5H4, J9P992, Q0QEN2
GO:0035639	purine ribonucleoside triphosphate binding	F	4	39	9.30233	5.64399	0.301962	1	OVER	J9NU17, E2R5H4, J9P992, Q0QEN2
GO:0001883	purine nucleoside binding	F	4	39	9.30233	5.64399	0.301962	1	OVER	J9NU17, E2R5H4, J9P992, Q0QEN2
GO:0001882	nucleoside binding	F	4	39	9.30233	5.64399	0.301962	1	OVER	J9NU17, E2R5H4, J9P992, Q0QEN2
GO:0031982	vesicle	C	2	73	4.65116	10.5644	0.304563	1	UNDER	J9P4B4, E2QXH0
GO:0032501	multicellular organismal process	P	5	126	11.6279	18.2344	0.310523	1	UNDER	J9NU17, E2R5H4, E2RLF1, F1PJ74, E2R357
GO:0051716	cellular response to stimulus	P	5	121	11.6279	17.5109	0.311362	1	UNDER	E2RLF1, E2R7A3, F1PJ74, J9NVE9, F1PGC3
GO:0002376	immune system process	P	5	121	11.6279	17.5109	0.311362	1	UNDER	J9PB81, J9P4B4, J9P9B9, E2QYB2, E2QUU8
GO:0032553	ribonucleotide binding	F	4	40	9.30233	5.78871	0.311461	1	OVER	J9NU17, E2R5H4, J9P992, Q0QEN2
GO:0016772	transferase activity, transferring phosphorus-containing groups	F	2	18	4.65116	2.60492	0.319448	1	OVER	L7N0L9, E2R5H4
GO:0006812	cation transport	P	2	18	4.65116	2.60492	0.319448	1	OVER	C4MW55, Q0QEN2
GO:0031324	negative regulation of cellular metabolic process	P	2	18	4.65116	2.60492	0.319448	1	OVER	J9NS29, J9NVE9
GO:0030163	protein catabolic process	P	2	18	4.65116	2.60492	0.319448	1	OVER	E2R4H4, E2QW34
GO:2000113	negative regulation of cellular macromolecule biosynthetic process	P	1	6	2.32558	0.868307	0.326894	1	OVER	J9NVE9
GO:0045892	negative regulation of transcription, DNA-templated	P	1	6	2.32558	0.868307	0.326894	1	OVER	J9NVE9
GO:0051253	negative regulation of RNA metabolic process	P	1	6	2.32558	0.868307	0.326894	1	OVER	J9NVE9
GO:0043604	amide biosynthetic process	P	1	6	2.32558	0.868307	0.326894	1	OVER	F6Y5M8
GO:0010975	regulation of neuron projection development	P	1	6	2.32558	0.868307	0.326894	1	OVER	F1PJ74
GO:0006412	translation	P	1	6	2.32558	0.868307	0.326894	1	OVER	F6Y5M8
GO:0051172	negative regulation of nitrogen compound metabolic process	P	1	6	2.32558	0.868307	0.326894	1	OVER	J9NVE9
GO:0022804	active transmembrane transporter activity	F	1	6	2.32558	0.868307	0.326894	1	OVER	Q0QEN2
GO:0045664	regulation of neuron differentiation	P	1	6	2.32558	0.868307	0.326894	1	OVER	F1PJ74
GO:0016758	transferase activity, transferring hexosyl groups	F	1	6	2.32558	0.868307	0.326894	1	OVER	F1PB77
GO:0016757	transferase activity, transferring glycosyl groups	F	1	6	2.32558	0.868307	0.326894	1	OVER	F1PB77
GO:0051015	actin filament binding	F	1	6	2.32558	0.868307	0.326894	1	OVER	J9P992
GO:0043410	positive regulation of MAPK cascade	P	1	6	2.32558	0.868307	0.326894	1	OVER	J9NVE9
GO:0043408	regulation of MAPK cascade	P	1	6	2.32558	0.868307	0.326894	1	OVER	J9NVE9
GO:1902679	negative regulation of RNA biosynthetic process	P	1	6	2.32558	0.868307	0.326894	1	OVER	J9NVE9
GO:0071827	plasma lipoprotein particle organization	P	1	6	2.32558	0.868307	0.326894	1	OVER	F1PJ74
GO:0071825	protein-lipid complex subunit organization	P	1	6	2.32558	0.868307	0.326894	1	OVER	F1PJ74
GO:1990234	transferase complex	C	1	6	2.32558	0.868307	0.326894	1	OVER	E2RL75
GO:1903507	negative regulation of nucleic acid-templated transcription	P	1	6	2.32558	0.868307	0.326894	1	OVER	J9NVE9
GO:0045934	negative regulation of nucleobase-containing compound metabolic process	P	1	6	2.32558	0.868307	0.326894	1	OVER	J9NVE9
GO:0055088	lipid homeostasis	P	1	6	2.32558	0.868307	0.326894	1	OVER	F1PJ74
GO:0009894	regulation of catabolic process	P	1	6	2.32558	0.868307	0.326894	1	OVER	J9NVE9
GO:0043043	peptide biosynthetic process	P	1	6	2.32558	0.868307	0.326894	1	OVER	F6Y5M8
GO:0005856	cytoskeleton	C	4	43	9.30233	6.22287	0.342947	1	OVER	J9NU17, F1Q0N9, J9P5Z0, J9P992
GO:0010605	negative regulation of macromolecule metabolic process	P	2	19	4.65116	2.74964	0.343636	1	OVER	J9NS29, J9NVE9
GO:0044255	cellular lipid metabolic process	P	2	19	4.65116	2.74964	0.343636	1	OVER	E2RLF1, J9NVE9
GO:0048583	regulation of response to stimulus	P	3	83	6.97674	12.0116	0.344029	1	UNDER	J9P4B4, F1PJ74, J9NVE9
GO:0002682	regulation of immune system process	P	1	48	2.32558	6.94645	0.352895	1	UNDER	J9P4B4
GO:0003676	nucleic acid binding	F	1	48	2.32558	6.94645	0.352895	1	UNDER	F1PGC3
GO:0005886	plasma membrane	C	1	50	2.32558	7.23589	0.358476	1	UNDER	J9NU17
GO:0006468	protein phosphorylation	P	2	20	4.65116	2.89436	0.367575	1	OVER	E2R5H4, J9NVE9
GO:0022892	substrate-specific transporter activity	F	2	20	4.65116	2.89436	0.367575	1	OVER	C4MW55, Q0QEN2
GO:0071345	cellular response to cytokine stimulus	P	1	7	2.32558	1.01302	0.370093	1	OVER	F1PGC3
GO:0000323	lytic vacuole	C	1	7	2.32558	1.01302	0.370093	1	OVER	E2RLF1
GO:0034097	response to cytokine	P	1	7	2.32558	1.01302	0.370093	1	OVER	F1PGC3
GO:0034660	ncRNA metabolic process	P	1	7	2.32558	1.01302	0.370093	1	OVER	E2RL75
GO:0005764	lysosome	C	1	7	2.32558	1.01302	0.370093	1	OVER	E2RLF1
GO:0031327	negative regulation of cellular biosynthetic process	P	1	7	2.32558	1.01302	0.370093	1	OVER	J9NVE9
GO:0032374	regulation of cholesterol transport	P	1	7	2.32558	1.01302	0.370093	1	OVER	F1PJ74
GO:0032371	regulation of sterol transport	P	1	7	2.32558	1.01302	0.370093	1	OVER	F1PJ74
GO:0010558	negative regulation of macromolecule biosynthetic process	P	1	7	2.32558	1.01302	0.370093	1	OVER	J9NVE9
GO:0044242	cellular lipid catabolic process	P	1	7	2.32558	1.01302	0.370093	1	OVER	J9NVE9
GO:0097006	regulation of plasma lipoprotein particle levels	P	1	7	2.32558	1.01302	0.370093	1	OVER	F1PJ74
GO:0009890	negative regulation of biosynthetic process	P	1	7	2.32558	1.01302	0.370093	1	OVER	J9NVE9
GO:0036094	small molecule binding	F	5	55	11.6279	7.95948	0.383067	1	OVER	J9NU17, F1PB77, E2R5H4, J9P992, Q0QEN2
GO:0006909	phagocytosis	P	0	22	0	3.18379	0.388683	1	UNDER
GO:0006732	coenzyme metabolic process	P	0	21	0	3.03907	0.389317	1	UNDER
GO:0044283	small molecule biosynthetic process	P	0	21	0	3.03907	0.389317	1	UNDER
GO:0008104	protein localization	P	0	21	0	3.03907	0.389317	1	UNDER
GO:0007596	blood coagulation	P	0	23	0	3.32851	0.389595	1	UNDER
GO:0051186	cofactor metabolic process	P	0	23	0	3.32851	0.389595	1	UNDER
GO:0040011	locomotion	P	0	23	0	3.32851	0.389595	1	UNDER
GO:0050817	coagulation	P	0	23	0	3.32851	0.389595	1	UNDER
GO:0007599	hemostasis	P	0	24	0	3.47323	0.391931	1	UNDER
GO:0006928	movement of cell or subcellular component	P	0	24	0	3.47323	0.391931	1	UNDER
GO:0005102	receptor binding	F	0	25	0	3.61795	0.395574	1	UNDER
GO:1902589	single-organism organelle organization	P	0	25	0	3.61795	0.395574	1	UNDER
GO:0042060	wound healing	P	0	25	0	3.61795	0.395574	1	UNDER
GO:0006796	phosphate-containing compound metabolic process	P	5	57	11.6279	8.24891	0.396503	1	OVER	C4MW55, E2R5H4, J9NVE9, P00011, Q0QEN2
GO:0043168	anion binding	F	5	57	11.6279	8.24891	0.396503	1	OVER	J9NU17, F1PB77, E2R5H4, J9P992, Q0QEN2
GO:0007166	cell surface receptor signaling pathway	P	0	26	0	3.76266	0.400412	1	UNDER
GO:0003824	catalytic activity	F	16	213	37.2093	30.8249	0.400971	1	OVER	C4MW55, F6Y5M8, J9PB81, J9NU17, L7N0L9, F1PB77, E2R5H4, J9P5Z0, E2R7A3, E2R4H4, J9P992, F1PIF2, E2R997, E2QW34, Q0QEN2, E2QXH0
GO:0070011	peptidase activity, acting on L-amino acid peptides	F	5	58	11.6279	8.39363	0.403869	1	OVER	J9PB81, E2R7A3, E2R4H4, F1PIF2, E2QW34
GO:0006793	phosphorus metabolic process	P	5	58	11.6279	8.39363	0.403869	1	OVER	C4MW55, E2R5H4, J9NVE9, P00011, Q0QEN2
GO:0050878	regulation of body fluid levels	P	0	27	0	3.90738	0.406337	1	UNDER
GO:0015850	organic hydroxy compound transport	P	1	8	2.32558	1.15774	0.41058	1	OVER	F1PJ74
GO:0050767	regulation of neurogenesis	P	1	8	2.32558	1.15774	0.41058	1	OVER	F1PJ74
GO:0098662	inorganic cation transmembrane transport	P	1	8	2.32558	1.15774	0.41058	1	OVER	Q0QEN2
GO:0098660	inorganic ion transmembrane transport	P	1	8	2.32558	1.15774	0.41058	1	OVER	Q0QEN2
GO:0098655	cation transmembrane transport	P	1	8	2.32558	1.15774	0.41058	1	OVER	Q0QEN2
GO:0006396	RNA processing	P	1	8	2.32558	1.15774	0.41058	1	OVER	E2RL75
GO:0030301	cholesterol transport	P	1	8	2.32558	1.15774	0.41058	1	OVER	F1PJ74
GO:1902533	positive regulation of intracellular signal transduction	P	1	8	2.32558	1.15774	0.41058	1	OVER	J9NVE9
GO:0001934	positive regulation of protein phosphorylation	P	1	8	2.32558	1.15774	0.41058	1	OVER	J9NVE9
GO:0023014	signal transduction by protein phosphorylation	P	1	8	2.32558	1.15774	0.41058	1	OVER	J9NVE9
GO:0000165	MAPK cascade	P	1	8	2.32558	1.15774	0.41058	1	OVER	J9NVE9
GO:0048037	cofactor binding	F	1	8	2.32558	1.15774	0.41058	1	OVER	F1PB77
GO:0015918	sterol transport	P	1	8	2.32558	1.15774	0.41058	1	OVER	F1PJ74
GO:0051960	regulation of nervous system development	P	1	8	2.32558	1.15774	0.41058	1	OVER	F1PJ74
GO:0051246	regulation of protein metabolic process	P	3	30	6.97674	4.34153	0.429637	1	OVER	F6Y5M8, F1PJ74, J9NVE9
GO:0005737	cytoplasm	C	11	137	25.5814	19.8263	0.431636	1	OVER	J9PB81, P60529, J9NU17, J9JHF7, P60524, F1PYZ1, E2RLF1, J9P5Z0, F1PIF2, P00011, Q0QEN2
GO:0007600	sensory perception	P	1	9	2.32558	1.30246	0.448522	1	OVER	J9NU17
GO:0034220	ion transmembrane transport	P	1	9	2.32558	1.30246	0.448522	1	OVER	Q0QEN2
GO:0003779	actin binding	F	1	9	2.32558	1.30246	0.448522	1	OVER	J9P992
GO:0042327	positive regulation of phosphorylation	P	1	9	2.32558	1.30246	0.448522	1	OVER	J9NVE9
GO:0005773	vacuole	C	1	9	2.32558	1.30246	0.448522	1	OVER	E2RLF1
GO:0004672	protein kinase activity	F	1	9	2.32558	1.30246	0.448522	1	OVER	E2R5H4
GO:0031344	regulation of cell projection organization	P	1	9	2.32558	1.30246	0.448522	1	OVER	F1PJ74
GO:0042157	lipoprotein metabolic process	P	1	9	2.32558	1.30246	0.448522	1	OVER	F1PJ74
GO:0032368	regulation of lipid transport	P	1	9	2.32558	1.30246	0.448522	1	OVER	F1PJ74
GO:0044262	cellular carbohydrate metabolic process	P	1	9	2.32558	1.30246	0.448522	1	OVER	F1PB77
GO:0042623	ATPase activity, coupled	F	1	9	2.32558	1.30246	0.448522	1	OVER	Q0QEN2
GO:0050877	neurological system process	P	1	9	2.32558	1.30246	0.448522	1	OVER	J9NU17
GO:0055114	oxidation-reduction process	P	3	32	6.97674	4.63097	0.448864	1	OVER	C4MW55, F1PB77, P00011
GO:0019637	organophosphate metabolic process	P	3	32	6.97674	4.63097	0.448864	1	OVER	C4MW55, P00011, Q0QEN2
GO:1901135	carbohydrate derivative metabolic process	P	3	35	6.97674	5.06512	0.48164	1	OVER	C4MW55, P00011, Q0QEN2
GO:0044248	cellular catabolic process	P	3	35	6.97674	5.06512	0.48164	1	OVER	E2R4H4, J9NVE9, E2QW34
GO:0006518	peptide metabolic process	P	1	10	2.32558	1.44718	0.484075	1	OVER	F6Y5M8
GO:1901137	carbohydrate derivative biosynthetic process	P	1	10	2.32558	1.44718	0.484075	1	OVER	Q0QEN2
GO:0060284	regulation of cell development	P	1	10	2.32558	1.44718	0.484075	1	OVER	F1PJ74
GO:0040007	growth	P	1	10	2.32558	1.44718	0.484075	1	OVER	E2RLF1
GO:0010629	negative regulation of gene expression	P	1	10	2.32558	1.44718	0.484075	1	OVER	J9NVE9
GO:0001932	regulation of protein phosphorylation	P	1	10	2.32558	1.44718	0.484075	1	OVER	J9NVE9
GO:0005044	scavenger receptor activity	F	1	10	2.32558	1.44718	0.484075	1	OVER	E2R7A3
GO:0010562	positive regulation of phosphorus metabolic process	P	1	10	2.32558	1.44718	0.484075	1	OVER	J9NVE9
GO:0045937	positive regulation of phosphate metabolic process	P	1	10	2.32558	1.44718	0.484075	1	OVER	J9NVE9
GO:0071840	cellular component organization or biogenesis	P	4	96	9.30233	13.8929	0.497006	1	UNDER	F1P6H7, F1PJ74, J9P992, E2R357
GO:0050776	regulation of immune response	P	1	37	2.32558	5.35456	0.503231	1	UNDER	J9P4B4
GO:0051239	regulation of multicellular organismal process	P	1	41	2.32558	5.93343	0.505822	1	UNDER	F1PJ74
GO:0006952	defense response	P	1	42	2.32558	6.07815	0.508339	1	UNDER	J9NVE9
GO:0006810	transport	P	8	102	18.6047	14.7612	0.508816	1	OVER	C4MW55, P60529, J9JHF7, P60524, F1PYZ1, F1P8V6, F1PJ74, Q0QEN2
GO:0002684	positive regulation of immune system process	P	1	43	2.32558	6.22287	0.511523	1	UNDER	J9P4B4
GO:0051234	establishment of localization	P	8	103	18.6047	14.9059	0.511868	1	OVER	C4MW55, P60529, J9JHF7, P60524, F1PYZ1, F1P8V6, F1PJ74, Q0QEN2
GO:0000166	nucleotide binding	F	4	44	9.30233	6.36758	0.515335	1	OVER	J9NU17, E2R5H4, J9P992, Q0QEN2
GO:1901265	nucleoside phosphate binding	F	4	44	9.30233	6.36758	0.515335	1	OVER	J9NU17, E2R5H4, J9P992, Q0QEN2
GO:0045111	intermediate filament cytoskeleton	C	1	11	2.32558	1.5919	0.517385	1	OVER	F1Q0N9
GO:0016887	ATPase activity	F	1	11	2.32558	1.5919	0.517385	1	OVER	Q0QEN2
GO:1901615	organic hydroxy compound metabolic process	P	1	11	2.32558	1.5919	0.517385	1	OVER	F1PJ74
GO:0005882	intermediate filament	C	1	11	2.32558	1.5919	0.517385	1	OVER	F1Q0N9
GO:0006956	complement activation	P	1	11	2.32558	1.5919	0.517385	1	OVER	J9P4B4
GO:0042325	regulation of phosphorylation	P	1	11	2.32558	1.5919	0.517385	1	OVER	J9NVE9
GO:0016042	lipid catabolic process	P	1	11	2.32558	1.5919	0.517385	1	OVER	J9NVE9
GO:0010647	positive regulation of cell communication	P	1	11	2.32558	1.5919	0.517385	1	OVER	J9NVE9
GO:0023056	positive regulation of signaling	P	1	11	2.32558	1.5919	0.517385	1	OVER	J9NVE9
GO:0032994	protein-lipid complex	C	1	11	2.32558	1.5919	0.517385	1	OVER	F1PJ74
GO:0006066	alcohol metabolic process	P	1	11	2.32558	1.5919	0.517385	1	OVER	F1PJ74
GO:0009967	positive regulation of signal transduction	P	1	11	2.32558	1.5919	0.517385	1	OVER	J9NVE9
GO:1990777	lipoprotein particle	C	1	11	2.32558	1.5919	0.517385	1	OVER	F1PJ74
GO:0034358	plasma lipoprotein particle	C	1	11	2.32558	1.5919	0.517385	1	OVER	F1PJ74
GO:0071704	organic substance metabolic process	P	19	265	44.186	38.3502	0.520462	1	OVER	C4MW55, F6Y5M8, J9PB81, J9NS29, F1P6H7, E2RL75, J9P4B4, F1PB77, E2R5H4, E2RLF1, E2R7A3, F1PJ74, E2R4H4, J9NVE9, F1PIF2, P00011, E2QW34, Q0QEN2, E2QXH0
GO:0004175	endopeptidase activity	F	4	49	9.30233	7.09117	0.5424	1	OVER	J9PB81, E2R7A3, E2R4H4, E2QW34
GO:0043603	cellular amide metabolic process	P	1	12	2.32558	1.73661	0.548592	1	OVER	F6Y5M8
GO:0038024	cargo receptor activity	F	1	12	2.32558	1.73661	0.548592	1	OVER	E2R7A3
GO:0006954	inflammatory response	P	1	12	2.32558	1.73661	0.548592	1	OVER	J9NVE9
GO:0042995	cell projection	C	1	12	2.32558	1.73661	0.548592	1	OVER	J9NU17
GO:0031401	positive regulation of protein modification process	P	1	12	2.32558	1.73661	0.548592	1	OVER	J9NVE9
GO:1902531	regulation of intracellular signal transduction	P	1	12	2.32558	1.73661	0.548592	1	OVER	J9NVE9
GO:0048666	neuron development	P	1	12	2.32558	1.73661	0.548592	1	OVER	F1PJ74
GO:0031175	neuron projection development	P	1	12	2.32558	1.73661	0.548592	1	OVER	F1PJ74
GO:0097367	carbohydrate derivative binding	F	4	51	9.30233	7.38061	0.556247	1	OVER	J9NU17, E2R5H4, J9P992, Q0QEN2
GO:1901575	organic substance catabolic process	P	4	52	9.30233	7.52533	0.563672	1	OVER	F1PJ74, E2R4H4, J9NVE9, E2QW34
GO:0010941	regulation of cell death	P	1	13	2.32558	1.88133	0.577824	1	OVER	F1PJ74
GO:0072376	protein activation cascade	P	1	13	2.32558	1.88133	0.577824	1	OVER	J9P4B4
GO:0019220	regulation of phosphate metabolic process	P	1	13	2.32558	1.88133	0.577824	1	OVER	J9NVE9
GO:0030182	neuron differentiation	P	1	13	2.32558	1.88133	0.577824	1	OVER	F1PJ74
GO:1902494	catalytic complex	C	1	13	2.32558	1.88133	0.577824	1	OVER	E2RL75
GO:0098805	whole membrane	C	1	13	2.32558	1.88133	0.577824	1	OVER	J9NU17
GO:0008233	peptidase activity	F	5	61	11.6279	8.82779	0.578108	1	OVER	J9PB81, E2R7A3, E2R4H4, F1PIF2, E2QW34
GO:1901564	organonitrogen compound metabolic process	P	5	65	11.6279	9.40666	0.594004	1	OVER	C4MW55, F6Y5M8, E2RLF1, P00011, Q0QEN2
GO:0048522	positive regulation of cellular process	P	5	66	11.6279	9.55137	0.598813	1	OVER	F1P6H7, J9P8M2, E2R5H4, F1PJ74, J9NVE9
GO:0043227	membrane-bounded organelle	C	10	190	23.2558	27.4964	0.599105	1	UNDER	J9PB81, E2RL75, J9P4B4, J9NYN2, E2RLF1, F1PJ74, F1PIF2, P00011, Q0QEN2, E2QXH0
GO:0043170	macromolecule metabolic process	P	14	193	32.5581	27.9305	0.60091	1	OVER	F6Y5M8, J9PB81, J9NS29, F1P6H7, E2RL75, J9P4B4, F1PB77, E2R5H4, E2R7A3, F1PJ74, E2R4H4, J9NVE9, F1PIF2, E2QW34
GO:0051241	negative regulation of multicellular organismal process	P	1	14	2.32558	2.02605	0.605205	1	OVER	F1PJ74
GO:0051174	regulation of phosphorus metabolic process	P	1	14	2.32558	2.02605	0.605205	1	OVER	J9NVE9
GO:0051130	positive regulation of cellular component organization	P	1	14	2.32558	2.02605	0.605205	1	OVER	F1PJ74
GO:0016773	phosphotransferase activity, alcohol group as acceptor	F	1	14	2.32558	2.02605	0.605205	1	OVER	E2R5H4
GO:0045595	regulation of cell differentiation	P	1	14	2.32558	2.02605	0.605205	1	OVER	F1PJ74
GO:0006869	lipid transport	P	1	14	2.32558	2.02605	0.605205	1	OVER	F1PJ74
GO:0031399	regulation of protein modification process	P	1	14	2.32558	2.02605	0.605205	1	OVER	J9NVE9
GO:0055085	transmembrane transport	P	1	14	2.32558	2.02605	0.605205	1	OVER	Q0QEN2
GO:0048519	negative regulation of biological process	P	3	70	6.97674	10.1302	0.608412	1	UNDER	J9NS29, F1PJ74, J9NVE9
GO:0005887	integral component of plasma membrane	C	0	15	0	2.17077	0.615344	1	UNDER
GO:0022603	regulation of anatomical structure morphogenesis	P	0	15	0	2.17077	0.615344	1	UNDER
GO:0032989	cellular component morphogenesis	P	0	15	0	2.17077	0.615344	1	UNDER
GO:0004871	signal transducer activity	F	0	16	0	2.31548	0.61577	1	UNDER
GO:0019318	hexose metabolic process	P	0	16	0	2.31548	0.61577	1	UNDER
GO:0065003	macromolecular complex assembly	P	0	16	0	2.31548	0.61577	1	UNDER
GO:0031226	intrinsic component of plasma membrane	C	0	16	0	2.31548	0.61577	1	UNDER
GO:0008283	cell proliferation	P	0	16	0	2.31548	0.61577	1	UNDER
GO:0006090	pyruvate metabolic process	P	0	16	0	2.31548	0.61577	1	UNDER
GO:0019725	cellular homeostasis	P	0	16	0	2.31548	0.61577	1	UNDER
GO:0007010	cytoskeleton organization	P	0	16	0	2.31548	0.61577	1	UNDER
GO:0046364	monosaccharide biosynthetic process	P	0	16	0	2.31548	0.61577	1	UNDER
GO:0044267	cellular protein metabolic process	P	6	77	13.9535	11.1433	0.617443	1	OVER	F6Y5M8, E2R5H4, F1PJ74, E2R4H4, J9NVE9, E2QW34
GO:0032101	regulation of response to external stimulus	P	0	17	0	2.4602	0.617735	1	UNDER
GO:0051649	establishment of localization in cell	P	0	17	0	2.4602	0.617735	1	UNDER
GO:1903034	regulation of response to wounding	P	0	17	0	2.4602	0.617735	1	UNDER
GO:0098797	plasma membrane protein complex	C	0	17	0	2.4602	0.617735	1	UNDER
GO:0051240	positive regulation of multicellular organismal process	P	0	18	0	2.60492	0.621045	1	UNDER
GO:0005996	monosaccharide metabolic process	P	0	18	0	2.60492	0.621045	1	UNDER
GO:1901605	alpha-amino acid metabolic process	P	0	18	0	2.60492	0.621045	1	UNDER
GO:0003677	DNA binding	F	0	18	0	2.60492	0.621045	1	UNDER
GO:0071822	protein complex subunit organization	P	0	18	0	2.60492	0.621045	1	UNDER
GO:0016051	carbohydrate biosynthetic process	P	0	18	0	2.60492	0.621045	1	UNDER
GO:0044424	intracellular part	C	17	242	39.5349	35.0217	0.623672	1	OVER	C4MW55, J9PB81, P60529, J9NU17, J9JHF7, P60524, E2RL75, F1Q0N9, F1PYZ1, E2RLF1, J9P5Z0, E2R4H4, J9P992, F1PIF2, P00011, E2QW34, Q0QEN2
GO:0044238	primary metabolic process	P	17	242	39.5349	35.0217	0.623672	1	OVER	C4MW55, F6Y5M8, J9PB81, E2RL75, J9P4B4, F1PB77, E2R5H4, E2RLF1, E2R7A3, F1PJ74, E2R4H4, J9NVE9, F1PIF2, P00011, E2QW34, Q0QEN2, E2QXH0
GO:0080134	regulation of response to stress	P	0	19	0	2.74964	0.625524	1	UNDER
GO:0051674	localization of cell	P	0	19	0	2.74964	0.625524	1	UNDER
GO:0048870	cell motility	P	0	19	0	2.74964	0.625524	1	UNDER
GO:0046496	nicotinamide nucleotide metabolic process	P	0	19	0	2.74964	0.625524	1	UNDER
GO:0016477	cell migration	P	0	19	0	2.74964	0.625524	1	UNDER
GO:0006520	cellular amino acid metabolic process	P	0	20	0	2.89436	0.631014	1	UNDER
GO:0072524	pyridine-containing compound metabolic process	P	0	20	0	2.89436	0.631014	1	UNDER
GO:0032787	monocarboxylic acid metabolic process	P	0	20	0	2.89436	0.631014	1	UNDER
GO:0019362	pyridine nucleotide metabolic process	P	0	20	0	2.89436	0.631014	1	UNDER
GO:0006733	oxidoreduction coenzyme metabolic process	P	0	20	0	2.89436	0.631014	1	UNDER
GO:0008152	metabolic process	P	20	286	46.5116	41.3893	0.633016	1	OVER	C4MW55, F6Y5M8, J9PB81, J9NS29, F1P6H7, E2RL75, J9P4B4, F1PB77, E2R5H4, E2RLF1, E2R7A3, F1PJ74, E2R4H4, J9NVE9, F1PIF2, E2R997, P00011, E2QW34, Q0QEN2, E2QXH0
GO:0009057	macromolecule catabolic process	P	2	21	4.65116	3.03907	0.63737	1	OVER	E2R4H4, E2QW34
GO:0098796	membrane protein complex	C	2	21	4.65116	3.03907	0.63737	1	OVER	C4MW55, Q0QEN2
GO:0032502	developmental process	P	4	86	9.30233	12.4457	0.63849	1	UNDER	F1P6H7, E2R5H4, E2RLF1, F1PJ74
GO:0044767	single-organism developmental process	P	4	85	9.30233	12.301	0.638585	1	UNDER	F1P6H7, E2R5H4, E2RLF1, F1PJ74
GO:0016043	cellular component organization	P	4	88	9.30233	12.7352	0.639213	1	UNDER	F1P6H7, F1PJ74, J9P992, E2R357
GO:0006811	ion transport	P	2	22	4.65116	3.18379	0.644462	1	OVER	C4MW55, Q0QEN2
GO:0004866	endopeptidase inhibitor activity	F	2	24	4.65116	3.47323	0.660393	1	OVER	J9NS29, J9PBN6
GO:0016788	hydrolase activity, acting on ester bonds	F	2	24	4.65116	3.47323	0.660393	1	OVER	F6Y5M8, E2QXH0
GO:0061135	endopeptidase regulator activity	F	2	24	4.65116	3.47323	0.660393	1	OVER	J9NS29, J9PBN6
GO:0030414	peptidase inhibitor activity	F	2	25	4.65116	3.61795	0.669031	1	OVER	J9NS29, J9PBN6
GO:0043231	intracellular membrane-bounded organelle	C	6	115	13.9535	16.6425	0.679579	1	UNDER	J9PB81, E2RL75, E2RLF1, F1PIF2, P00011, Q0QEN2
GO:0004857	enzyme inhibitor activity	F	2	27	4.65116	3.90738	0.687221	1	OVER	J9NS29, J9PBN6
GO:0005215	transporter activity	F	2	27	4.65116	3.90738	0.687221	1	OVER	C4MW55, Q0QEN2
GO:0061134	peptidase regulator activity	F	2	27	4.65116	3.90738	0.687221	1	OVER	J9NS29, J9PBN6
GO:0051179	localization	P	9	129	20.9302	18.6686	0.692405	1	OVER	C4MW55, P60529, J9NU17, J9JHF7, P60524, F1PYZ1, F1P8V6, F1PJ74, Q0QEN2
GO:0004252	serine-type endopeptidase activity	F	2	28	4.65116	4.0521	0.696628	1	OVER	J9PB81, E2R7A3
GO:0017171	serine hydrolase activity	F	2	28	4.65116	4.0521	0.696628	1	OVER	J9PB81, E2R7A3
GO:0031325	positive regulation of cellular metabolic process	P	2	28	4.65116	4.0521	0.696628	1	OVER	F1PJ74, J9NVE9
GO:0008236	serine-type peptidase activity	F	2	28	4.65116	4.0521	0.696628	1	OVER	J9PB81, E2R7A3
GO:0019538	protein metabolic process	P	10	141	23.2558	20.4052	0.698723	1	OVER	F6Y5M8, J9PB81, J9P4B4, E2R5H4, E2R7A3, F1PJ74, E2R4H4, J9NVE9, F1PIF2, E2QW34
GO:0006351	transcription, DNA-templated	P	1	31	2.32558	4.48625	0.713558	1	UNDER	J9NVE9
GO:0031981	nuclear lumen	C	1	31	2.32558	4.48625	0.713558	1	UNDER	E2RL75
GO:0071702	organic substance transport	P	1	31	2.32558	4.48625	0.713558	1	UNDER	F1PJ74
GO:0060089	molecular transducer activity	F	1	31	2.32558	4.48625	0.713558	1	UNDER	E2R7A3
GO:0097659	nucleic acid-templated transcription	P	1	31	2.32558	4.48625	0.713558	1	UNDER	J9NVE9
GO:0042592	homeostatic process	P	1	30	2.32558	4.34153	0.713879	1	UNDER	F1PJ74
GO:0051252	regulation of RNA metabolic process	P	1	30	2.32558	4.34153	0.713879	1	UNDER	J9NVE9
GO:0044459	plasma membrane part	C	1	30	2.32558	4.34153	0.713879	1	UNDER	J9NU17
GO:0022610	biological adhesion	P	1	30	2.32558	4.34153	0.713879	1	UNDER	F1P6H7
GO:0008270	zinc ion binding	F	1	30	2.32558	4.34153	0.713879	1	UNDER	J9NYN2
GO:0007155	cell adhesion	P	1	30	2.32558	4.34153	0.713879	1	UNDER	F1P6H7
GO:0032879	regulation of localization	P	1	30	2.32558	4.34153	0.713879	1	UNDER	F1PJ74
GO:0032774	RNA biosynthetic process	P	1	32	2.32558	4.63097	0.713884	1	UNDER	J9NVE9
GO:0019219	regulation of nucleobase-containing compound metabolic process	P	1	32	2.32558	4.63097	0.713884	1	UNDER	J9NVE9
GO:0044428	nuclear part	C	1	33	2.32558	4.77569	0.714815	1	UNDER	E2RL75
GO:0030154	cell differentiation	P	1	33	2.32558	4.77569	0.714815	1	UNDER	F1PJ74
GO:0005975	carbohydrate metabolic process	P	1	34	2.32558	4.92041	0.716312	1	UNDER	F1PB77
GO:0002253	activation of immune response	P	1	34	2.32558	4.92041	0.716312	1	UNDER	J9P4B4
GO:0044712	single-organism catabolic process	P	1	35	2.32558	5.06512	0.718334	1	UNDER	J9NVE9
GO:0050778	positive regulation of immune response	P	1	35	2.32558	5.06512	0.718334	1	UNDER	J9P4B4
GO:0033036	macromolecule localization	P	1	36	2.32558	5.20984	0.720842	1	UNDER	F1PJ74
GO:0048869	cellular developmental process	P	1	36	2.32558	5.20984	0.720842	1	UNDER	F1PJ74
GO:0070013	intracellular organelle lumen	C	1	36	2.32558	5.20984	0.720842	1	UNDER	E2RL75
GO:0031974	membrane-enclosed lumen	C	1	36	2.32558	5.20984	0.720842	1	UNDER	E2RL75
GO:0043233	organelle lumen	C	1	36	2.32558	5.20984	0.720842	1	UNDER	E2RL75
GO:0016740	transferase activity	F	3	39	6.97674	5.64399	0.73089	1	OVER	L7N0L9, F1PB77, E2R5H4
GO:0009889	regulation of biosynthetic process	P	3	39	6.97674	5.64399	0.73089	1	OVER	F6Y5M8, F1PJ74, J9NVE9
GO:0043226	organelle	C	14	242	32.5581	35.0217	0.743315	1	UNDER	J9PB81, J9NU17, E2RL75, J9P4B4, J9NYN2, F1Q0N9, E2RLF1, J9P5Z0, F1PJ74, J9P992, F1PIF2, P00011, Q0QEN2, E2QXH0
GO:0005622	intracellular	C	17	250	39.5349	36.1795	0.745474	1	OVER	C4MW55, J9PB81, P60529, J9NU17, J9JHF7, P60524, E2RL75, F1Q0N9, F1PYZ1, E2RLF1, J9P5Z0, E2R4H4, J9P992, F1PIF2, P00011, E2QW34, Q0QEN2
GO:0044271	cellular nitrogen compound biosynthetic process	P	3	43	6.97674	6.22287	0.748844	1	OVER	F6Y5M8, J9NVE9, Q0QEN2
GO:0043412	macromolecule modification	P	2	46	4.65116	6.65702	0.760078	1	UNDER	E2R5H4, J9NVE9
GO:0016021	integral component of membrane	C	2	49	4.65116	7.09117	0.760902	1	UNDER	C4MW55, J9NZW6
GO:0034645	cellular macromolecule biosynthetic process	P	2	49	4.65116	7.09117	0.760902	1	UNDER	F6Y5M8, J9NVE9
GO:0031224	intrinsic component of membrane	C	2	51	4.65116	7.38061	0.763151	1	UNDER	C4MW55, J9NZW6
GO:0009059	macromolecule biosynthetic process	P	2	52	4.65116	7.52533	0.764737	1	UNDER	F6Y5M8, J9NVE9
GO:0071944	cell periphery	C	2	52	4.65116	7.52533	0.764737	1	UNDER	J9NU17, F1Q0N9
GO:0048584	positive regulation of response to stimulus	P	2	52	4.65116	7.52533	0.764737	1	UNDER	J9P4B4, J9NVE9
GO:0009056	catabolic process	P	4	60	9.30233	8.68307	0.786242	1	OVER	F1PJ74, E2R4H4, J9NVE9, E2QW34
GO:0007275	multicellular organismal development	P	3	65	6.97674	9.40666	0.788827	1	UNDER	E2R5H4, E2RLF1, F1PJ74
GO:0044249	cellular biosynthetic process	P	3	66	6.97674	9.55137	0.789552	1	UNDER	F6Y5M8, J9NVE9, Q0QEN2
GO:0060255	regulation of macromolecule metabolic process	P	5	68	11.6279	9.84081	0.79166	1	OVER	F6Y5M8, J9NS29, F1P6H7, F1PJ74, J9NVE9
GO:0006139	nucleobase-containing compound metabolic process	P	5	69	11.6279	9.98553	0.793026	1	OVER	C4MW55, E2RL75, J9NVE9, P00011, Q0QEN2
GO:0006508	proteolysis	P	5	71	11.6279	10.275	0.796331	1	OVER	J9PB81, E2R7A3, E2R4H4, F1PIF2, E2QW34
GO:1901576	organic substance biosynthetic process	P	4	79	9.30233	11.4327	0.807216	1	UNDER	F6Y5M8, F1PJ74, J9NVE9, Q0QEN2
GO:0044425	membrane part	C	4	79	9.30233	11.4327	0.807216	1	UNDER	C4MW55, J9NU17, J9NZW6, Q0QEN2
GO:0046483	heterocycle metabolic process	P	5	76	11.6279	10.9986	0.807493	1	OVER	C4MW55, E2RL75, J9NVE9, P00011, Q0QEN2
GO:0034641	cellular nitrogen compound metabolic process	P	6	85	13.9535	12.301	0.811228	1	OVER	C4MW55, F6Y5M8, E2RL75, J9NVE9, P00011, Q0QEN2
GO:1901360	organic cyclic compound metabolic process	P	6	85	13.9535	12.301	0.811228	1	OVER	C4MW55, E2RL75, F1PJ74, J9NVE9, P00011, Q0QEN2
GO:0019222	regulation of metabolic process	P	6	88	13.9535	12.7352	0.815362	1	OVER	F6Y5M8, J9NS29, F1P6H7, E2RLF1, F1PJ74, J9NVE9
GO:0046872	metal ion binding	F	6	109	13.9535	15.7742	0.83181	1	UNDER	C4MW55, P60529, J9JHF7, P60524, J9NYN2, F1PYZ1
GO:0043169	cation binding	F	6	112	13.9535	16.2084	0.8321	1	UNDER	C4MW55, P60529, J9JHF7, P60524, J9NYN2, F1PYZ1
GO:0044260	cellular macromolecule metabolic process	P	8	121	18.6047	17.5109	0.839084	1	OVER	F6Y5M8, E2RL75, F1PB77, E2R5H4, F1PJ74, E2R4H4, J9NVE9, E2QW34
GO:0048518	positive regulation of biological process	P	7	123	16.2791	17.8003	0.840506	1	UNDER	F1PDY8, F1P6H7, J9P8M2, J9P4B4, E2R5H4, F1PJ74, J9NVE9
GO:0044710	single-organism metabolic process	P	9	136	20.9302	19.6816	0.845723	1	OVER	C4MW55, J9P4B4, F1PB77, E2RLF1, F1PJ74, J9NVE9, P00011, Q0QEN2, E2QXH0
GO:0043167	ion binding	F	11	162	25.5814	23.4443	0.853545	1	OVER	C4MW55, P60529, J9NU17, J9JHF7, P60524, J9NYN2, F1PYZ1, F1PB77, E2R5H4, J9P992, Q0QEN2
GO:0044237	cellular metabolic process	P	13	195	30.2326	28.22	0.862376	1	OVER	C4MW55, F6Y5M8, J9NS29, E2RL75, F1PB77, E2R5H4, E2RLF1, F1PJ74, E2R4H4, J9NVE9, P00011, E2QW34, Q0QEN2
GO:0043232	intracellular non-membrane-bounded organelle	C	4	62	9.30233	8.9725	1	1	OVER	J9NU17, F1Q0N9, J9P5Z0, J9P992
GO:0043228	non-membrane-bounded organelle	C	4	62	9.30233	8.9725	1	1	OVER	J9NU17, F1Q0N9, J9P5Z0, J9P992
GO:0009058	biosynthetic process	P	5	84	11.6279	12.1563	1	1	UNDER	F6Y5M8, F1PJ74, J9NVE9, E2R997, Q0QEN2
GO:0006807	nitrogen compound metabolic process	P	7	111	16.2791	16.0637	1	1	UNDER	C4MW55, F6Y5M8, E2RL75, E2RLF1, J9NVE9, P00011, Q0QEN2
GO:0044281	small molecule metabolic process	P	4	63	9.30233	9.11722	1	1	UNDER	C4MW55, F1PJ74, P00011, Q0QEN2
GO:0031323	regulation of cellular metabolic process	P	4	68	9.30233	9.84081	1	1	UNDER	F6Y5M8, J9NS29, F1PJ74, J9NVE9
GO:0051171	regulation of nitrogen compound metabolic process	P	2	37	4.65116	5.35456	1	1	UNDER	F6Y5M8, J9NVE9
GO:0019438	aromatic compound biosynthetic process	P	2	37	4.65116	5.35456	1	1	UNDER	J9NVE9, Q0QEN2
GO:0009605	response to external stimulus	P	2	37	4.65116	5.35456	1	1	UNDER	J9PB81, F1PGC3
GO:0006996	organelle organization	P	2	37	4.65116	5.35456	1	1	UNDER	J9P992, E2R357
GO:0031326	regulation of cellular biosynthetic process	P	2	37	4.65116	5.35456	1	1	UNDER	F6Y5M8, J9NVE9
GO:0018130	heterocycle biosynthetic process	P	2	37	4.65116	5.35456	1	1	UNDER	J9NVE9, Q0QEN2
GO:1901362	organic cyclic compound biosynthetic process	P	2	37	4.65116	5.35456	1	1	UNDER	J9NVE9, Q0QEN2
GO:0010468	regulation of gene expression	P	2	38	4.65116	5.49928	1	1	UNDER	F6Y5M8, J9NVE9
GO:0044723	single-organism carbohydrate metabolic process	P	1	26	2.32558	3.76266	1	1	UNDER	F1PB77
GO:0010604	positive regulation of macromolecule metabolic process	P	1	26	2.32558	3.76266	1	1	UNDER	J9NVE9
GO:0048513	organ development	P	1	26	2.32558	3.76266	1	1	UNDER	E2RLF1
GO:0010467	gene expression	P	3	53	6.97674	7.67004	1	1	UNDER	F6Y5M8, E2RL75, J9NVE9
GO:0048523	negative regulation of cellular process	P	3	53	6.97674	7.67004	1	1	UNDER	J9NS29, F1PJ74, J9NVE9
GO:0080090	regulation of primary metabolic process	P	4	71	9.30233	10.275	1	1	UNDER	F6Y5M8, E2RLF1, F1PJ74, J9NVE9
GO:0044422	organelle part	C	6	94	13.9535	13.6035	1	1	OVER	J9NU17, E2RL75, F1Q0N9, J9P5Z0, J9P992, Q0QEN2
GO:0034654	nucleobase-containing compound biosynthetic process	P	2	35	4.65116	5.06512	1	1	UNDER	J9NVE9, Q0QEN2
GO:0016070	RNA metabolic process	P	2	40	4.65116	5.78871	1	1	UNDER	E2RL75, J9NVE9
GO:0009893	positive regulation of metabolic process	P	2	32	4.65116	4.63097	1	1	UNDER	F1PJ74, J9NVE9
GO:0042221	response to chemical	P	3	49	6.97674	7.09117	1	1	UNDER	F1PDY8, J9NVE9, F1PGC3
GO:0051128	regulation of cellular component organization	P	1	27	2.32558	3.90738	1	1	UNDER	F1PJ74
GO:0010646	regulation of cell communication	P	1	27	2.32558	3.90738	1	1	UNDER	J9NVE9
GO:0023051	regulation of signaling	P	1	27	2.32558	3.90738	1	1	UNDER	J9NVE9
GO:0098772	molecular function regulator	F	2	41	4.65116	5.93343	1	1	UNDER	J9NS29, J9PBN6
GO:0048731	system development	P	3	56	6.97674	8.1042	1	1	UNDER	E2R5H4, E2RLF1, F1PJ74
GO:0031012	extracellular matrix	C	1	28	2.32558	4.0521	1	1	UNDER	F1P6H7
GO:0004872	receptor activity	F	1	28	2.32558	4.0521	1	1	UNDER	E2R7A3
GO:0006355	regulation of transcription, DNA-templated	P	1	28	2.32558	4.0521	1	1	UNDER	J9NVE9
GO:0010033	response to organic substance	P	1	28	2.32558	4.0521	1	1	UNDER	F1PGC3
GO:1903506	regulation of nucleic acid-templated transcription	P	1	28	2.32558	4.0521	1	1	UNDER	J9NVE9
GO:0090304	nucleic acid metabolic process	P	2	44	4.65116	6.36758	1	1	UNDER	E2RL75, J9NVE9
GO:0044711	single-organism biosynthetic process	P	2	34	4.65116	4.92041	1	1	UNDER	F1PJ74, Q0QEN2
GO:0010556	regulation of macromolecule biosynthetic process	P	2	34	4.65116	4.92041	1	1	UNDER	F6Y5M8, J9NVE9
GO:0048856	anatomical structure development	P	4	74	9.30233	10.7091	1	1	UNDER	F1P6H7, E2R5H4, E2RLF1, F1PJ74
GO:0030234	enzyme regulator activity	F	2	36	4.65116	5.20984	1	1	UNDER	J9NS29, J9PBN6
GO:0072593	reactive oxygen species metabolic process	P	0	7	0	1.01302	1	1	OVER
GO:0071495	cellular response to endogenous stimulus	P	0	7	0	1.01302	1	1	OVER
GO:0045861	negative regulation of proteolysis	P	0	7	0	1.01302	1	1	OVER
GO:0051258	protein polymerization	P	0	7	0	1.01302	1	1	OVER
GO:0032102	negative regulation of response to external stimulus	P	0	7	0	1.01302	1	1	OVER
GO:0043623	cellular protein complex assembly	P	0	7	0	1.01302	1	1	OVER
GO:0004930	G-protein coupled receptor activity	F	0	7	0	1.01302	1	1	OVER
GO:0006470	protein dephosphorylation	P	0	7	0	1.01302	1	1	OVER
GO:0016209	antioxidant activity	F	0	7	0	1.01302	1	1	OVER
GO:0046873	metal ion transmembrane transporter activity	F	0	7	0	1.01302	1	1	OVER
GO:0016829	lyase activity	F	0	7	0	1.01302	1	1	OVER
GO:0009072	aromatic amino acid family metabolic process	P	0	7	0	1.01302	1	1	OVER
GO:0009069	serine family amino acid metabolic process	P	0	7	0	1.01302	1	1	OVER
GO:0005912	adherens junction	C	0	7	0	1.01302	1	1	OVER
GO:0001558	regulation of cell growth	P	0	7	0	1.01302	1	1	OVER
GO:0051726	regulation of cell cycle	P	0	7	0	1.01302	1	1	OVER
GO:0009617	response to bacterium	P	0	7	0	1.01302	1	1	OVER
GO:0070161	anchoring junction	C	0	7	0	1.01302	1	1	OVER
GO:0005874	microtubule	C	0	7	0	1.01302	1	1	OVER
GO:0060326	cell chemotaxis	P	0	7	0	1.01302	1	1	OVER
GO:0016049	cell growth	P	0	7	0	1.01302	1	1	OVER
GO:0010720	positive regulation of cell development	P	0	7	0	1.01302	1	1	OVER
GO:0000904	cell morphogenesis involved in differentiation	P	0	7	0	1.01302	1	1	OVER
GO:0042254	ribosome biogenesis	P	0	7	0	1.01302	1	1	OVER
GO:1903047	mitotic cell cycle process	P	0	7	0	1.01302	1	1	OVER
GO:1903035	negative regulation of response to wounding	P	0	7	0	1.01302	1	1	OVER
GO:0005768	endosome	C	0	7	0	1.01302	1	1	OVER
GO:0034622	cellular macromolecular complex assembly	P	0	7	0	1.01302	1	1	OVER
GO:0005730	nucleolus	C	0	7	0	1.01302	1	1	OVER
GO:0040008	regulation of growth	P	0	7	0	1.01302	1	1	OVER
GO:0000278	mitotic cell cycle	P	0	7	0	1.01302	1	1	OVER
GO:0030246	carbohydrate binding	F	0	7	0	1.01302	1	1	OVER
GO:1902580	single-organism cellular localization	P	0	7	0	1.01302	1	1	OVER
GO:0030203	glycosaminoglycan metabolic process	P	0	7	0	1.01302	1	1	OVER
GO:0022613	ribonucleoprotein complex biogenesis	P	0	7	0	1.01302	1	1	OVER
GO:0007267	cell-cell signaling	P	0	7	0	1.01302	1	1	OVER
GO:0019899	enzyme binding	F	0	7	0	1.01302	1	1	OVER
GO:0045454	cell redox homeostasis	P	0	7	0	1.01302	1	1	OVER
GO:0006355	regulation of transcription, DNA-templated	P	0	7	0	1.01302	1	1	OVER
GO:0006022	aminoglycan metabolic process	P	0	7	0	1.01302	1	1	OVER
GO:0098802	plasma membrane receptor complex	C	0	7	0	1.01302	1	1	OVER
GO:0006644	phospholipid metabolic process	P	0	7	0	1.01302	1	1	OVER
GO:0045935	positive regulation of nucleobase-containing compound metabolic process	P	0	7	0	1.01302	1	1	OVER
GO:0050819	negative regulation of coagulation	P	0	7	0	1.01302	1	1	OVER
GO:0009887	organ morphogenesis	P	0	7	0	1.01302	1	1	OVER
GO:0043086	negative regulation of catalytic activity	P	0	7	0	1.01302	1	1	OVER
GO:0043085	positive regulation of catalytic activity	P	0	7	0	1.01302	1	1	OVER
GO:0048514	blood vessel morphogenesis	P	0	7	0	1.01302	1	1	OVER
GO:0016311	dephosphorylation	P	0	7	0	1.01302	1	1	OVER
GO:0044106	cellular amine metabolic process	P	0	7	0	1.01302	1	1	OVER
GO:0005623	cell	C	20	310	46.5116	44.8625	1	1	OVER	C4MW55, J9PB81, F1PDY8, P60529, J9NU17, J9JHF7, P60524, E2RL75, F1Q0N9, F1PYZ1, F1PB77, E2RLF1, J9P5Z0, F1PJ74, E2R4H4, J9P992, F1PIF2, P00011, E2QW34, Q0QEN2
GO:0006725	cellular aromatic compound metabolic process	P	5	77	11.6279	11.1433	1	1	OVER	C4MW55, E2RL75, J9NVE9, P00011, Q0QEN2
GO:2001141	regulation of RNA biosynthetic process	P	1	29	2.32558	4.19682	1	1	UNDER	J9NVE9
GO:0043933	macromolecular complex subunit organization	P	1	29	2.32558	4.19682	1	1	UNDER	F1PJ74
GO:0065009	regulation of molecular function	P	1	29	2.32558	4.19682	1	1	UNDER	F1PJ74
GO:0016491	oxidoreductase activity	F	1	29	2.32558	4.19682	1	1	UNDER	C4MW55
GO:0044446	intracellular organelle part	C	6	92	13.9535	13.314	1	1	OVER	J9NU17, E2RL75, F1Q0N9, J9P5Z0, J9P992, Q0QEN2
GO:2000112	regulation of cellular macromolecule biosynthetic process	P	2	31	4.65116	4.48625	1	1	OVER	F6Y5M8, J9NVE9
GO:0044464	cell part	C	20	308	46.5116	44.5731	1	1	OVER	C4MW55, J9PB81, F1PDY8, P60529, J9NU17, J9JHF7, P60524, E2RL75, F1Q0N9, F1PYZ1, F1PB77, E2RLF1, J9P5Z0, F1PJ74, E2R4H4, J9P992, F1PIF2, P00011, E2QW34, Q0QEN2
GO:0051641	cellular localization	P	1	23	2.32558	3.32851	1	1	UNDER	J9NU17
GO:0005198	structural molecule activity	F	1	23	2.32558	3.32851	1	1	UNDER	F1Q0N9
GO:0035556	intracellular signal transduction	P	1	23	2.32558	3.32851	1	1	UNDER	J9NVE9
GO:0006464	cellular protein modification process	P	2	45	4.65116	6.5123	1	1	UNDER	E2R5H4, J9NVE9
GO:0036211	protein modification process	P	2	45	4.65116	6.5123	1	1	UNDER	E2R5H4, J9NVE9
GO:0070887	cellular response to chemical stimulus	P	1	24	2.32558	3.47323	1	1	UNDER	F1PGC3
GO:0007399	nervous system development	P	1	24	2.32558	3.47323	1	1	UNDER	F1PJ74
GO:0009966	regulation of signal transduction	P	1	24	2.32558	3.47323	1	1	UNDER	J9NVE9
GO:0001071	nucleic acid binding transcription factor activity	F	0	10	0	1.44718	1	1	UNDER
GO:0051270	regulation of cellular component movement	P	0	10	0	1.44718	1	1	UNDER
GO:0072562	blood microparticle	C	0	10	0	1.44718	1	1	UNDER
GO:1900046	regulation of hemostasis	P	0	10	0	1.44718	1	1	UNDER
GO:0044092	negative regulation of molecular function	P	0	10	0	1.44718	1	1	UNDER
GO:0098588	bounding membrane of organelle	C	0	10	0	1.44718	1	1	UNDER
GO:0003700	transcription factor activity, sequence-specific DNA binding	F	0	10	0	1.44718	1	1	UNDER
GO:0033043	regulation of organelle organization	P	0	10	0	1.44718	1	1	UNDER
GO:0031410	cytoplasmic vesicle	C	0	10	0	1.44718	1	1	UNDER
GO:0040012	regulation of locomotion	P	0	10	0	1.44718	1	1	UNDER
GO:1902582	single-organism intracellular transport	P	0	10	0	1.44718	1	1	UNDER
GO:0001944	vasculature development	P	0	10	0	1.44718	1	1	UNDER
GO:0043235	receptor complex	C	0	10	0	1.44718	1	1	UNDER
GO:0030193	regulation of blood coagulation	P	0	10	0	1.44718	1	1	UNDER
GO:0009986	cell surface	C	0	10	0	1.44718	1	1	UNDER
GO:0005578	proteinaceous extracellular matrix	C	0	10	0	1.44718	1	1	UNDER
GO:0032269	negative regulation of cellular protein metabolic process	P	0	10	0	1.44718	1	1	UNDER
GO:0030036	actin cytoskeleton organization	P	0	10	0	1.44718	1	1	UNDER
GO:0055080	cation homeostasis	P	0	10	0	1.44718	1	1	UNDER
GO:0019682	glyceraldehyde-3-phosphate metabolic process	P	0	10	0	1.44718	1	1	UNDER
GO:0098771	inorganic ion homeostasis	P	0	10	0	1.44718	1	1	UNDER
GO:0007017	microtubule-based process	P	0	10	0	1.44718	1	1	UNDER
GO:0043229	intracellular organelle	C	10	167	23.2558	24.1679	1	1	UNDER	J9PB81, J9NU17, E2RL75, F1Q0N9, E2RLF1, J9P5Z0, J9P992, F1PIF2, P00011, Q0QEN2
GO:0050790	regulation of catalytic activity	P	1	22	2.32558	3.18379	1	1	UNDER	F1PJ74
GO:0046983	protein dimerization activity	F	0	6	0	0.868307	1	1	OVER
GO:0045893	positive regulation of transcription, DNA-templated	P	0	6	0	0.868307	1	1	OVER
GO:0061045	negative regulation of wound healing	P	0	6	0	0.868307	1	1	OVER
GO:0006511	ubiquitin-dependent protein catabolic process	P	0	6	0	0.868307	1	1	OVER
GO:0051254	positive regulation of RNA metabolic process	P	0	6	0	0.868307	1	1	OVER
GO:0051248	negative regulation of protein metabolic process	P	0	11	0	1.5919	1	1	UNDER
GO:0042578	phosphoric ester hydrolase activity	F	0	11	0	1.5919	1	1	UNDER
GO:0046916	cellular transition metal ion homeostasis	P	0	6	0	0.868307	1	1	OVER
GO:0043632	modification-dependent macromolecule catabolic process	P	0	6	0	0.868307	1	1	OVER
GO:0072511	divalent inorganic cation transport	P	0	6	0	0.868307	1	1	OVER
GO:1900047	negative regulation of hemostasis	P	0	6	0	0.868307	1	1	OVER
GO:0060548	negative regulation of cell death	P	0	6	0	0.868307	1	1	OVER
GO:0008047	enzyme activator activity	F	0	6	0	0.868307	1	1	OVER
GO:0044093	positive regulation of molecular function	P	0	11	0	1.5919	1	1	UNDER
GO:0044089	positive regulation of cellular component biogenesis	P	0	6	0	0.868307	1	1	OVER
GO:0009790	embryo development	P	0	6	0	0.868307	1	1	OVER
GO:0098636	protein complex involved in cell adhesion	C	0	6	0	0.868307	1	1	OVER
GO:0004222	metalloendopeptidase activity	F	0	6	0	0.868307	1	1	OVER
GO:0004867	serine-type endopeptidase inhibitor activity	F	0	11	0	1.5919	1	1	UNDER
GO:0045095	keratin filament	C	0	6	0	0.868307	1	1	OVER
GO:0001525	angiogenesis	P	0	6	0	0.868307	1	1	OVER
GO:1901681	sulfur compound binding	F	0	6	0	0.868307	1	1	OVER
GO:0001503	ossification	P	0	6	0	0.868307	1	1	OVER
GO:0070838	divalent metal ion transport	P	0	6	0	0.868307	1	1	OVER
GO:0006366	transcription from RNA polymerase II promoter	P	0	11	0	1.5919	1	1	UNDER
GO:0006357	regulation of transcription from RNA polymerase II promoter	P	0	11	0	1.5919	1	1	UNDER
GO:0051093	negative regulation of developmental process	P	0	6	0	0.868307	1	1	OVER
GO:0016798	hydrolase activity, acting on glycosyl bonds	F	0	6	0	0.868307	1	1	OVER
GO:0051050	positive regulation of transport	P	0	6	0	0.868307	1	1	OVER
GO:0015631	tubulin binding	F	0	6	0	0.868307	1	1	OVER
GO:0042330	taxis	P	0	11	0	1.5919	1	1	UNDER
GO:0006935	chemotaxis	P	0	11	0	1.5919	1	1	UNDER
GO:0005815	microtubule organizing center	C	0	6	0	0.868307	1	1	OVER
GO:0004721	phosphoprotein phosphatase activity	F	0	6	0	0.868307	1	1	OVER
GO:0042981	regulation of apoptotic process	P	0	11	0	1.5919	1	1	UNDER
GO:1902680	positive regulation of RNA biosynthetic process	P	0	6	0	0.868307	1	1	OVER
GO:0070727	cellular macromolecule localization	P	0	11	0	1.5919	1	1	UNDER
GO:0016053	organic acid biosynthetic process	P	0	6	0	0.868307	1	1	OVER
GO:0006259	DNA metabolic process	P	0	6	0	0.868307	1	1	OVER
GO:0048858	cell projection morphogenesis	P	0	11	0	1.5919	1	1	UNDER
GO:0016684	oxidoreductase activity, acting on peroxide as acceptor	F	0	6	0	0.868307	1	1	OVER
GO:0019941	modification-dependent protein catabolic process	P	0	6	0	0.868307	1	1	OVER
GO:0006886	intracellular protein transport	P	0	6	0	0.868307	1	1	OVER
GO:0005794	Golgi apparatus	C	0	11	0	1.5919	1	1	UNDER
GO:0044432	endoplasmic reticulum part	C	0	6	0	0.868307	1	1	OVER
GO:0006879	cellular iron ion homeostasis	P	0	6	0	0.868307	1	1	OVER
GO:0005783	endoplasmic reticulum	C	0	11	0	1.5919	1	1	UNDER
GO:0044427	chromosomal part	C	0	6	0	0.868307	1	1	OVER
GO:0032446	protein modification by small protein conjugation	P	0	6	0	0.868307	1	1	OVER
GO:0006816	calcium ion transport	P	0	6	0	0.868307	1	1	OVER
GO:0034613	cellular protein localization	P	0	11	0	1.5919	1	1	UNDER
GO:0031347	regulation of defense response	P	0	6	0	0.868307	1	1	OVER
GO:0070647	protein modification by small protein conjugation or removal	P	0	6	0	0.868307	1	1	OVER
GO:0071705	nitrogen compound transport	P	0	6	0	0.868307	1	1	OVER
GO:0010638	positive regulation of organelle organization	P	0	6	0	0.868307	1	1	OVER
GO:0008305	integrin complex	C	0	6	0	0.868307	1	1	OVER
GO:0019838	growth factor binding	F	0	6	0	0.868307	1	1	OVER
GO:0016567	protein ubiquitination	P	0	6	0	0.868307	1	1	OVER
GO:0006790	sulfur compound metabolic process	P	0	11	0	1.5919	1	1	UNDER
GO:0005694	chromosome	C	0	6	0	0.868307	1	1	OVER
GO:0030195	negative regulation of blood coagulation	P	0	6	0	0.868307	1	1	OVER
GO:0051493	regulation of cytoskeleton organization	P	0	6	0	0.868307	1	1	OVER
GO:0030168	platelet activation	P	0	6	0	0.868307	1	1	OVER
GO:0030162	regulation of proteolysis	P	0	11	0	1.5919	1	1	UNDER
GO:0032990	cell part morphogenesis	P	0	11	0	1.5919	1	1	UNDER
GO:0009395	phospholipid catabolic process	P	0	6	0	0.868307	1	1	OVER
GO:0032970	regulation of actin filament-based process	P	0	6	0	0.868307	1	1	OVER
GO:0007186	G-protein coupled receptor signaling pathway	P	0	11	0	1.5919	1	1	UNDER
GO:1903508	positive regulation of nucleic acid-templated transcription	P	0	6	0	0.868307	1	1	OVER
GO:0007169	transmembrane receptor protein tyrosine kinase signaling pathway	P	0	11	0	1.5919	1	1	UNDER
GO:0007160	cell-matrix adhesion	P	0	6	0	0.868307	1	1	OVER
GO:0048646	anatomical structure formation involved in morphogenesis	P	0	11	0	1.5919	1	1	UNDER
GO:0016482	cytoplasmic transport	P	0	6	0	0.868307	1	1	OVER
GO:0050900	leukocyte migration	P	0	6	0	0.868307	1	1	OVER
GO:0090066	regulation of anatomical structure size	P	0	6	0	0.868307	1	1	OVER
GO:0005539	glycosaminoglycan binding	F	0	6	0	0.868307	1	1	OVER
GO:0015976	carbon utilization	P	0	6	0	0.868307	1	1	OVER
GO:0030029	actin filament-based process	P	0	11	0	1.5919	1	1	UNDER
GO:0001775	cell activation	P	0	11	0	1.5919	1	1	UNDER
GO:0055076	transition metal ion homeostasis	P	0	6	0	0.868307	1	1	OVER
GO:0055072	iron ion homeostasis	P	0	6	0	0.868307	1	1	OVER
GO:0046394	carboxylic acid biosynthetic process	P	0	6	0	0.868307	1	1	OVER
GO:0045298	tubulin complex	C	0	6	0	0.868307	1	1	OVER
GO:0007015	actin filament organization	P	0	6	0	0.868307	1	1	OVER
GO:0050818	regulation of coagulation	P	0	11	0	1.5919	1	1	UNDER
GO:0043067	regulation of programmed cell death	P	0	11	0	1.5919	1	1	UNDER
GO:0006576	cellular biogenic amine metabolic process	P	0	6	0	0.868307	1	1	OVER
GO:0006570	tyrosine metabolic process	P	0	6	0	0.868307	1	1	OVER
GO:0031090	organelle membrane	C	0	11	0	1.5919	1	1	UNDER
GO:0046939	nucleotide phosphorylation	P	0	14	0	2.02605	1	1	UNDER
GO:0044724	single-organism carbohydrate catabolic process	P	0	14	0	2.02605	1	1	UNDER
GO:0009185	ribonucleoside diphosphate metabolic process	P	0	14	0	2.02605	1	1	UNDER
GO:0009179	purine ribonucleoside diphosphate metabolic process	P	0	14	0	2.02605	1	1	UNDER
GO:0009135	purine nucleoside diphosphate metabolic process	P	0	14	0	2.02605	1	1	UNDER
GO:0012501	programmed cell death	P	0	14	0	2.02605	1	1	UNDER
GO:0009132	nucleoside diphosphate metabolic process	P	0	14	0	2.02605	1	1	UNDER
GO:0006461	protein complex assembly	P	0	14	0	2.02605	1	1	UNDER
GO:0070271	protein complex biogenesis	P	0	14	0	2.02605	1	1	UNDER
GO:0015630	microtubule cytoskeleton	C	0	14	0	2.02605	1	1	UNDER
GO:0006915	apoptotic process	P	0	14	0	2.02605	1	1	UNDER
GO:0046031	ADP metabolic process	P	0	14	0	2.02605	1	1	UNDER
GO:0016052	carbohydrate catabolic process	P	0	14	0	2.02605	1	1	UNDER
GO:0019319	hexose biosynthetic process	P	0	14	0	2.02605	1	1	UNDER
GO:0006165	nucleoside diphosphate phosphorylation	P	0	14	0	2.02605	1	1	UNDER
GO:0006757	ATP generation from ADP	P	0	14	0	2.02605	1	1	UNDER
GO:0006096	glycolytic process	P	0	14	0	2.02605	1	1	UNDER
GO:0006094	gluconeogenesis	P	0	14	0	2.02605	1	1	UNDER
GO:0006006	glucose metabolic process	P	0	14	0	2.02605	1	1	UNDER
GO:0030054	cell junction	C	0	14	0	2.02605	1	1	UNDER
GO:0009888	tissue development	P	0	14	0	2.02605	1	1	UNDER
GO:0050793	regulation of developmental process	P	1	25	2.32558	3.61795	1	1	UNDER	F1PJ74
GO:0006534	cysteine metabolic process	P	0	3	0	0.434153	1	1	OVER
GO:0044798	nuclear transcription factor complex	C	0	3	0	0.434153	1	1	OVER
GO:0007608	sensory perception of smell	P	0	3	0	0.434153	1	1	OVER
GO:0007606	sensory perception of chemical stimulus	P	0	3	0	0.434153	1	1	OVER
GO:0051271	negative regulation of cellular component movement	P	0	3	0	0.434153	1	1	OVER
GO:0044782	cilium organization	P	0	3	0	0.434153	1	1	OVER
GO:0045862	positive regulation of proteolysis	P	0	3	0	0.434153	1	1	OVER
GO:0051261	protein depolymerization	P	0	3	0	0.434153	1	1	OVER
GO:0044772	mitotic cell cycle phase transition	P	0	3	0	0.434153	1	1	OVER
GO:0044770	cell cycle phase transition	P	0	3	0	0.434153	1	1	OVER
GO:0051259	protein oligomerization	P	0	3	0	0.434153	1	1	OVER
GO:0051249	regulation of lymphocyte activation	P	0	3	0	0.434153	1	1	OVER
GO:0032103	positive regulation of response to external stimulus	P	0	3	0	0.434153	1	1	OVER
GO:0016942	insulin-like growth factor binding protein complex	C	0	3	0	0.434153	1	1	OVER
GO:0051223	regulation of protein transport	P	0	3	0	0.434153	1	1	OVER
GO:0004984	olfactory receptor activity	F	0	3	0	0.434153	1	1	OVER
GO:0043624	cellular protein complex disassembly	P	0	3	0	0.434153	1	1	OVER
GO:0008081	phosphoric diester hydrolase activity	F	0	3	0	0.434153	1	1	OVER
GO:1903318	negative regulation of protein maturation	P	0	3	0	0.434153	1	1	OVER
GO:1903317	regulation of protein maturation	P	0	3	0	0.434153	1	1	OVER
GO:0060560	developmental growth involved in morphogenesis	P	0	3	0	0.434153	1	1	OVER
GO:1901136	carbohydrate derivative catabolic process	P	0	3	0	0.434153	1	1	OVER
GO:1900048	positive regulation of hemostasis	P	0	3	0	0.434153	1	1	OVER
GO:0008064	regulation of actin polymerization or depolymerization	P	0	3	0	0.434153	1	1	OVER
GO:0050792	regulation of viral process	P	0	3	0	0.434153	1	1	OVER
GO:0001667	ameboidal-type cell migration	P	0	3	0	0.434153	1	1	OVER
GO:0001649	osteoblast differentiation	P	0	3	0	0.434153	1	1	OVER
GO:0009112	nucleobase metabolic process	P	0	3	0	0.434153	1	1	OVER
GO:0045185	maintenance of protein location	P	0	3	0	0.434153	1	1	OVER
GO:0010976	positive regulation of neuron projection development	P	0	3	0	0.434153	1	1	OVER
GO:0010955	negative regulation of protein processing	P	0	3	0	0.434153	1	1	OVER
GO:0036454	growth factor complex	C	0	3	0	0.434153	1	1	OVER
GO:0010927	cellular component assembly involved in morphogenesis	P	0	3	0	0.434153	1	1	OVER
GO:0006457	protein folding	P	0	3	0	0.434153	1	1	OVER
GO:0045785	positive regulation of cell adhesion	P	0	3	0	0.434153	1	1	OVER
GO:0071396	cellular response to lipid	P	0	3	0	0.434153	1	1	OVER
GO:0016866	intramolecular transferase activity	F	0	3	0	0.434153	1	1	OVER
GO:0016861	intramolecular oxidoreductase activity, interconverting aldoses and ketoses	F	0	3	0	0.434153	1	1	OVER
GO:0016860	intramolecular oxidoreductase activity	F	0	3	0	0.434153	1	1	OVER
GO:0043567	regulation of insulin-like growth factor receptor signaling pathway	P	0	3	0	0.434153	1	1	OVER
GO:0043566	structure-specific DNA binding	F	0	3	0	0.434153	1	1	OVER
GO:0045732	positive regulation of protein catabolic process	P	0	3	0	0.434153	1	1	OVER
GO:0060491	regulation of cell projection assembly	P	0	3	0	0.434153	1	1	OVER
GO:0042439	ethanolamine-containing compound metabolic process	P	0	3	0	0.434153	1	1	OVER
GO:0042430	indole-containing compound metabolic process	P	0	3	0	0.434153	1	1	OVER
GO:0015711	organic anion transport	P	0	3	0	0.434153	1	1	OVER
GO:0002683	negative regulation of immune system process	P	0	3	0	0.434153	1	1	OVER
GO:0009064	glutamine family amino acid metabolic process	P	0	3	0	0.434153	1	1	OVER
GO:0009063	cellular amino acid catabolic process	P	0	3	0	0.434153	1	1	OVER
GO:1902115	regulation of organelle assembly	P	0	3	0	0.434153	1	1	OVER
GO:0070201	regulation of establishment of protein localization	P	0	3	0	0.434153	1	1	OVER
GO:0010243	response to organonitrogen compound	P	0	3	0	0.434153	1	1	OVER
GO:0005929	cilium	C	0	3	0	0.434153	1	1	OVER
GO:1901698	response to nitrogen compound	P	0	3	0	0.434153	1	1	OVER
GO:0001523	retinoid metabolic process	P	0	3	0	0.434153	1	1	OVER
GO:0016197	endosomal transport	P	0	3	0	0.434153	1	1	OVER
GO:0001501	skeletal system development	P	0	3	0	0.434153	1	1	OVER
GO:0019439	aromatic compound catabolic process	P	0	3	0	0.434153	1	1	OVER
GO:1903827	regulation of cellular protein localization	P	0	3	0	0.434153	1	1	OVER
GO:0008543	fibroblast growth factor receptor signaling pathway	P	0	3	0	0.434153	1	1	OVER
GO:0010817	regulation of hormone levels	P	0	3	0	0.434153	1	1	OVER
GO:0010812	negative regulation of cell-substrate adhesion	P	0	3	0	0.434153	1	1	OVER
GO:0016101	diterpenoid metabolic process	P	0	3	0	0.434153	1	1	OVER
GO:0007420	brain development	P	0	3	0	0.434153	1	1	OVER
GO:0051098	regulation of binding	P	0	3	0	0.434153	1	1	OVER
GO:0034110	regulation of homotypic cell-cell adhesion	P	0	3	0	0.434153	1	1	OVER
GO:0045666	positive regulation of neuron differentiation	P	0	3	0	0.434153	1	1	OVER
GO:0051051	negative regulation of transport	P	0	3	0	0.434153	1	1	OVER
GO:0016747	transferase activity, transferring acyl groups other than amino-acyl groups	F	0	3	0	0.434153	1	1	OVER
GO:0016705	oxidoreductase activity, acting on paired donors, with incorporation or reduction of molecular oxygen	F	0	3	0	0.434153	1	1	OVER
GO:0006914	autophagy	P	0	3	0	0.434153	1	1	OVER
GO:0005819	spindle	C	0	3	0	0.434153	1	1	OVER
GO:0060322	head development	P	0	3	0	0.434153	1	1	OVER
GO:0051651	maintenance of location in cell	P	0	3	0	0.434153	1	1	OVER
GO:0004714	transmembrane receptor protein tyrosine kinase activity	F	0	3	0	0.434153	1	1	OVER
GO:0004713	protein tyrosine kinase activity	F	0	3	0	0.434153	1	1	OVER
GO:0030336	negative regulation of cell migration	P	0	3	0	0.434153	1	1	OVER
GO:0032507	maintenance of protein location in cell	P	0	3	0	0.434153	1	1	OVER
GO:0002520	immune system development	P	0	3	0	0.434153	1	1	OVER
GO:0031406	carboxylic acid binding	F	0	3	0	0.434153	1	1	OVER
GO:0042967	acyl-carrier-protein biosynthetic process	P	0	3	0	0.434153	1	1	OVER
GO:0031400	negative regulation of protein modification process	P	0	3	0	0.434153	1	1	OVER
GO:0030307	positive regulation of cell growth	P	0	3	0	0.434153	1	1	OVER
GO:0010770	positive regulation of cell morphogenesis involved in differentiation	P	0	3	0	0.434153	1	1	OVER
GO:0016055	Wnt signaling pathway	P	0	3	0	0.434153	1	1	OVER
GO:0000981	RNA polymerase II transcription factor activity, sequence-specific DNA binding	F	0	3	0	0.434153	1	1	OVER
GO:0005178	integrin binding	F	0	3	0	0.434153	1	1	OVER
GO:0007346	regulation of mitotic cell cycle	P	0	3	0	0.434153	1	1	OVER
GO:0048871	multicellular organismal homeostasis	P	0	3	0	0.434153	1	1	OVER
GO:0004064	arylesterase activity	F	0	3	0	0.434153	1	1	OVER
GO:0043394	proteoglycan binding	F	0	3	0	0.434153	1	1	OVER
GO:0046649	lymphocyte activation	P	0	3	0	0.434153	1	1	OVER
GO:0016667	oxidoreductase activity, acting on a sulfur group of donors	F	0	3	0	0.434153	1	1	OVER
GO:0044454	nuclear chromosome part	C	0	3	0	0.434153	1	1	OVER
GO:0005788	endoplasmic reticulum lumen	C	0	3	0	0.434153	1	1	OVER
GO:1903037	regulation of leukocyte cell-cell adhesion	P	0	3	0	0.434153	1	1	OVER
GO:0004674	protein serine/threonine kinase activity	F	0	3	0	0.434153	1	1	OVER
GO:0060271	cilium morphogenesis	P	0	3	0	0.434153	1	1	OVER
GO:0010038	response to metal ion	P	0	3	0	0.434153	1	1	OVER
GO:0006801	superoxide metabolic process	P	0	3	0	0.434153	1	1	OVER
GO:0031333	negative regulation of protein complex assembly	P	0	3	0	0.434153	1	1	OVER
GO:0002443	leukocyte mediated immunity	P	0	3	0	0.434153	1	1	OVER
GO:1990351	transporter complex	C	0	3	0	0.434153	1	1	OVER
GO:0071774	response to fibroblast growth factor	P	0	3	0	0.434153	1	1	OVER
GO:0002429	immune response-activating cell surface receptor signaling pathway	P	0	3	0	0.434153	1	1	OVER
GO:0097285	cell-type specific apoptotic process	P	0	3	0	0.434153	1	1	OVER
GO:0000228	nuclear chromosome	C	0	3	0	0.434153	1	1	OVER
GO:1903649	regulation of cytoplasmic transport	P	0	3	0	0.434153	1	1	OVER
GO:0070613	regulation of protein processing	P	0	3	0	0.434153	1	1	OVER
GO:0010639	negative regulation of organelle organization	P	0	3	0	0.434153	1	1	OVER
GO:0007265	Ras protein signal transduction	P	0	3	0	0.434153	1	1	OVER
GO:0005085	guanyl-nucleotide exchange factor activity	F	0	3	0	0.434153	1	1	OVER
GO:0060828	regulation of canonical Wnt signaling pathway	P	0	3	0	0.434153	1	1	OVER
GO:0030837	negative regulation of actin filament polymerization	P	0	3	0	0.434153	1	1	OVER
GO:0001948	glycoprotein binding	F	0	3	0	0.434153	1	1	OVER
GO:0030833	regulation of actin filament polymerization	P	0	3	0	0.434153	1	1	OVER
GO:0030832	regulation of actin filament length	P	0	3	0	0.434153	1	1	OVER
GO:0006144	purine nucleobase metabolic process	P	0	3	0	0.434153	1	1	OVER
GO:0016570	histone modification	P	0	3	0	0.434153	1	1	OVER
GO:0048729	tissue morphogenesis	P	0	3	0	0.434153	1	1	OVER
GO:0016569	covalent chromatin modification	P	0	3	0	0.434153	1	1	OVER
GO:0016568	chromatin modification	P	0	3	0	0.434153	1	1	OVER
GO:0019814	immunoglobulin complex	C	0	3	0	0.434153	1	1	OVER
GO:0042176	regulation of protein catabolic process	P	0	3	0	0.434153	1	1	OVER
GO:0044344	cellular response to fibroblast growth factor stimulus	P	0	3	0	0.434153	1	1	OVER
GO:0043254	regulation of protein complex assembly	P	0	3	0	0.434153	1	1	OVER
GO:0043241	protein complex disassembly	P	0	3	0	0.434153	1	1	OVER
GO:0016525	negative regulation of angiogenesis	P	0	3	0	0.434153	1	1	OVER
GO:0043236	laminin binding	F	0	3	0	0.434153	1	1	OVER
GO:1904035	regulation of epithelial cell apoptotic process	P	0	3	0	0.434153	1	1	OVER
GO:0006767	water-soluble vitamin metabolic process	P	0	3	0	0.434153	1	1	OVER
GO:0006766	vitamin metabolic process	P	0	3	0	0.434153	1	1	OVER
GO:1904019	epithelial cell apoptotic process	P	0	3	0	0.434153	1	1	OVER
GO:0006749	glutathione metabolic process	P	0	3	0	0.434153	1	1	OVER
GO:0030194	positive regulation of blood coagulation	P	0	3	0	0.434153	1	1	OVER
GO:0042110	T cell activation	P	0	3	0	0.434153	1	1	OVER
GO:0051495	positive regulation of cytoskeleton organization	P	0	3	0	0.434153	1	1	OVER
GO:0051494	negative regulation of cytoskeleton organization	P	0	3	0	0.434153	1	1	OVER
GO:0006721	terpenoid metabolic process	P	0	3	0	0.434153	1	1	OVER
GO:0006720	isoprenoid metabolic process	P	0	3	0	0.434153	1	1	OVER
GO:0031252	cell leading edge	C	0	3	0	0.434153	1	1	OVER
GO:0052548	regulation of endopeptidase activity	P	0	3	0	0.434153	1	1	OVER
GO:0004518	nuclease activity	F	0	3	0	0.434153	1	1	OVER
GO:0019199	transmembrane receptor protein kinase activity	F	0	3	0	0.434153	1	1	OVER
GO:1902495	transmembrane transporter complex	C	0	3	0	0.434153	1	1	OVER
GO:0031214	biomineral tissue development	P	0	3	0	0.434153	1	1	OVER
GO:0030111	regulation of Wnt signaling pathway	P	0	3	0	0.434153	1	1	OVER
GO:0097164	ammonium ion metabolic process	P	0	3	0	0.434153	1	1	OVER
GO:0000122	negative regulation of transcription from RNA polymerase II promoter	P	0	3	0	0.434153	1	1	OVER
GO:0032984	macromolecular complex disassembly	P	0	3	0	0.434153	1	1	OVER
GO:1901343	negative regulation of vasculature development	P	0	3	0	0.434153	1	1	OVER
GO:0008285	negative regulation of cell proliferation	P	0	3	0	0.434153	1	1	OVER
GO:0001894	tissue homeostasis	P	0	3	0	0.434153	1	1	OVER
GO:0048009	insulin-like growth factor receptor signaling pathway	P	0	3	0	0.434153	1	1	OVER
GO:0007187	G-protein coupled receptor signaling pathway, coupled to cyclic nucleotide second messenger	P	0	3	0	0.434153	1	1	OVER
GO:0007178	transmembrane receptor protein serine/threonine kinase signaling pathway	P	0	3	0	0.434153	1	1	OVER
GO:0000785	chromatin	C	0	3	0	0.434153	1	1	OVER
GO:0007162	negative regulation of cell adhesion	P	0	3	0	0.434153	1	1	OVER
GO:0007159	leukocyte cell-cell adhesion	P	0	3	0	0.434153	1	1	OVER
GO:0008235	metalloexopeptidase activity	F	0	3	0	0.434153	1	1	OVER
GO:0050953	sensory perception of light stimulus	P	0	3	0	0.434153	1	1	OVER
GO:0006024	glycosaminoglycan biosynthetic process	P	0	3	0	0.434153	1	1	OVER
GO:0006023	aminoglycan biosynthetic process	P	0	3	0	0.434153	1	1	OVER
GO:0046470	phosphatidylcholine metabolic process	P	0	3	0	0.434153	1	1	OVER
GO:0019751	polyol metabolic process	P	0	3	0	0.434153	1	1	OVER
GO:0006012	galactose metabolic process	P	0	3	0	0.434153	1	1	OVER
GO:0048639	positive regulation of developmental growth	P	0	3	0	0.434153	1	1	OVER
GO:0048638	regulation of developmental growth	P	0	3	0	0.434153	1	1	OVER
GO:0044272	sulfur compound biosynthetic process	P	0	3	0	0.434153	1	1	OVER
GO:0043177	organic acid binding	F	0	3	0	0.434153	1	1	OVER
GO:0060090	binding, bridging	F	0	3	0	0.434153	1	1	OVER
GO:0006650	glycerophospholipid metabolic process	P	0	3	0	0.434153	1	1	OVER
GO:0032272	negative regulation of protein polymerization	P	0	3	0	0.434153	1	1	OVER
GO:0032271	regulation of protein polymerization	P	0	3	0	0.434153	1	1	OVER
GO:0060070	canonical Wnt signaling pathway	P	0	3	0	0.434153	1	1	OVER
GO:0030097	hemopoiesis	P	0	3	0	0.434153	1	1	OVER
GO:0004459	L-lactate dehydrogenase activity	F	0	3	0	0.434153	1	1	OVER
GO:0004457	lactate dehydrogenase activity	F	0	3	0	0.434153	1	1	OVER
GO:0071593	lymphocyte aggregation	P	0	3	0	0.434153	1	1	OVER
GO:0002250	adaptive immune response	P	0	3	0	0.434153	1	1	OVER
GO:0030042	actin filament depolymerization	P	0	3	0	0.434153	1	1	OVER
GO:0002237	response to molecule of bacterial origin	P	0	3	0	0.434153	1	1	OVER
GO:0070489	T cell aggregation	P	0	3	0	0.434153	1	1	OVER
GO:0070486	leukocyte aggregation	P	0	3	0	0.434153	1	1	OVER
GO:0051347	positive regulation of transferase activity	P	0	3	0	0.434153	1	1	OVER
GO:0051345	positive regulation of hydrolase activity	P	0	3	0	0.434153	1	1	OVER
GO:1990138	neuron projection extension	P	0	3	0	0.434153	1	1	OVER
GO:0045927	positive regulation of growth	P	0	3	0	0.434153	1	1	OVER
GO:0019058	viral life cycle	P	0	3	0	0.434153	1	1	OVER
GO:0051301	cell division	P	0	3	0	0.434153	1	1	OVER
GO:0008199	ferric iron binding	F	0	3	0	0.434153	1	1	OVER
GO:0008194	UDP-glycosyltransferase activity	F	0	3	0	0.434153	1	1	OVER
GO:0030674	protein binding, bridging	F	0	3	0	0.434153	1	1	OVER
GO:0048588	developmental cell growth	P	0	3	0	0.434153	1	1	OVER
GO:0050863	regulation of T cell activation	P	0	3	0	0.434153	1	1	OVER
GO:0007018	microtubule-based movement	P	0	3	0	0.434153	1	1	OVER
GO:0051918	negative regulation of fibrinolysis	P	0	3	0	0.434153	1	1	OVER
GO:0050820	positive regulation of coagulation	P	0	3	0	0.434153	1	1	OVER
GO:0009897	external side of plasma membrane	C	0	3	0	0.434153	1	1	OVER
GO:0048534	hematopoietic or lymphoid organ development	P	0	3	0	0.434153	1	1	OVER
GO:2000181	negative regulation of blood vessel morphogenesis	P	0	3	0	0.434153	1	1	OVER
GO:0006586	indolalkylamine metabolic process	P	0	3	0	0.434153	1	1	OVER
GO:2000146	negative regulation of cell motility	P	0	3	0	0.434153	1	1	OVER
GO:0006568	tryptophan metabolic process	P	0	3	0	0.434153	1	1	OVER
GO:0061061	muscle structure development	P	0	3	0	0.434153	1	1	OVER
GO:0044087	regulation of cellular component biogenesis	P	0	9	0	1.30246	1	1	UNDER
GO:0098602	single organism cell adhesion	P	0	9	0	1.30246	1	1	UNDER
GO:0009725	response to hormone	P	0	9	0	1.30246	1	1	UNDER
GO:0051173	positive regulation of nitrogen compound metabolic process	P	0	9	0	1.30246	1	1	UNDER
GO:0051156	glucose 6-phosphate metabolic process	P	0	9	0	1.30246	1	1	UNDER
GO:0016853	isomerase activity	F	0	9	0	1.30246	1	1	UNDER
GO:0045087	innate immune response	P	0	9	0	1.30246	1	1	UNDER
GO:0030334	regulation of cell migration	P	0	9	0	1.30246	1	1	UNDER
GO:0016023	cytoplasmic membrane-bounded vesicle	C	0	9	0	1.30246	1	1	UNDER
GO:0045597	positive regulation of cell differentiation	P	0	9	0	1.30246	1	1	UNDER
GO:0006875	cellular metal ion homeostasis	P	0	9	0	1.30246	1	1	UNDER
GO:0006873	cellular ion homeostasis	P	0	9	0	1.30246	1	1	UNDER
GO:0010628	positive regulation of gene expression	P	0	9	0	1.30246	1	1	UNDER
GO:0030198	extracellular matrix organization	P	0	9	0	1.30246	1	1	UNDER
GO:0006739	NADP metabolic process	P	0	9	0	1.30246	1	1	UNDER
GO:0006098	pentose-phosphate shunt	P	0	9	0	1.30246	1	1	UNDER
GO:0030003	cellular cation homeostasis	P	0	9	0	1.30246	1	1	UNDER
GO:0055082	cellular chemical homeostasis	P	0	9	0	1.30246	1	1	UNDER
GO:0055065	metal ion homeostasis	P	0	9	0	1.30246	1	1	UNDER
GO:0009891	positive regulation of biosynthetic process	P	0	9	0	1.30246	1	1	UNDER
GO:0043062	extracellular structure organization	P	0	9	0	1.30246	1	1	UNDER
GO:2000145	regulation of cell motility	P	0	9	0	1.30246	1	1	UNDER
